# Supplementary material for: De novo transcriptome sequencing and SSR markers development for Cedrela balansae C.DC., a native tree species of northwest Argentina
Source: PLoS One. 2018 Dec 7;13(12):e0203768. doi: 10.1371/journal.pone.0203768 (PMC6285271; doi:10.1371/journal.pone.0203768)
Supplement: S1 Table — This table provides information on the annotation of isotigs and singletons, GO information and the enzymes putatively encoded by the RNA sequences, based on homology prediction and their associated pathways. This includes KEGG maps, enzyme names, and sequences ID. (XLSX) [file pone.0203768.s001.xlsx]

## Sheet: All Unigenes
Seq. Name	Seq. Description	Seq. Length	#Hits	min. eValue	mean Similarity	#GOs	GOs	Enzyme Codes
isotig00978	calmodulin	746	10	6.71486e-66	99.8%	14	C:cytosol; P:oxidation-reduction process; F:calcium ion binding; F:O-methyltransferase activity; P:regulation of photomorphogenesis; P:acetyl-CoA metabolic process; P:detection of calcium ion; F:protein binding; F:2-alkenal reductase [NAD(P)] activity; P:pollen germination; C:vacuole; P:calcium-mediated signaling; C:plasma membrane; P:response to mechanical stimulus	EC:1.3.1.74
isotig00979	bromodomain-containing protein	747	10	1.78768e-26	61.3%	4	F:transferase activity; P:histone acetylation; F:histone acetyltransferase activity; F:transferase activity, transferring acyl groups
isotig00980	---NA---	748	0			0	-
isotig00981	zinc finger a20 and an1 domain-containing stress-associated protein 5-like	748	10	8.34908e-32	67.2%	5	P:response to water deprivation; F:metal ion binding; P:protein autoubiquitination; F:ubiquitin-protein ligase activity; C:nucleus	EC:6.3.2.19
isotig00982	protein plastid transcriptionally active 16	741	10	2.77089e-29	83.8%	17	P:stomatal complex morphogenesis; P:photosynthesis, light reaction; P:pentose-phosphate shunt; P:response to far red light; C:chloroplast envelope; P:carotenoid biosynthetic process; F:nucleotide binding; P:response to red light; P:chloroplast relocation; C:plastid chromosome; P:chlorophyll biosynthetic process; P:response to blue light; P:glucosinolate biosynthetic process; C:chloroplast thylako…	-
isotig00983	uncharacterized protein loc100245206	742	10	1.41664e-53	76.2%	0	-
isotig00984	histone h1	742	10	0.0397925	89.6%	4	C:nucleolus; C:nucleosome; F:DNA binding; P:nucleosome assembly	-
isotig00985	aspartic proteinase nepenthesin-1	742	10	6.84712e-87	86.8%	5	C:plant-type cell wall; C:apoplast; P:proteolysis; F:aspartic-type endopeptidase activity; C:chloroplast	EC:3.4.23.0
isotig00986	probable protein phosphatase 2c 13-like	726	10	1.57019e-90	88.6%	4	P:protein dephosphorylation; F:metal ion binding; F:protein serine/threonine phosphatase activity; C:protein serine/threonine phosphatase complex	-
isotig00987	gras family transcription factor	741	10	1.7754e-111	91.8%	1	P:regulation of transcription, DNA-dependent	-
isotig00988	brefeldin a-inhibited guanine nucleotide-exchange protein 1-like	740	10	3.48102e-91	84.4%	5	F:ARF guanyl-nucleotide exchange factor activity; P:regulation of ARF protein signal transduction; P:megagametogenesis; C:nucleus; C:cytosol	-
isotig00989	apoptosis inhibitory protein 5	737	10	8.46717e-106	90.7%	2	C:plasmodesma; C:cytosol	-
isotig00990	protein set	732	10	6.63314e-87	90.4%	2	P:nucleosome assembly; C:nucleus	-
isotig00991	cyclophilin	739	10	7.80904e-67	94.3%	5	P:protein folding; C:plasma membrane; C:chloroplast; P:protein peptidyl-prolyl isomerization; F:peptidyl-prolyl cis-trans isomerase activity	EC:5.2.1.8
isotig00992	dna-binding storekeeper transcriptional regulator	731	10	1.10867e-41	62.2%	1	C:nucleolus	-
isotig00993	zinc ion binding	729	10	1.46471e-46	88.2%	2	F:zinc ion binding; C:plasma membrane	-
isotig00994	---NA---	727	0			0	-
isotig00995	u-box domain-containing protein	732	10	9.47757e-82	92.5%	5	C:integral to membrane; C:photosystem I; P:photosynthesis; C:plasma membrane; F:ligase activity	-
isotig00996	al-induced protein	735	10	1.04227e-79	95.3%	1	C:plasma membrane	-
isotig00997	small gtpase	735	10	1.25812e-93	97.2%	6	C:vacuole; F:GTP binding; C:plasma membrane; F:hydrolase activity; P:small GTPase mediated signal transduction; P:protein transport	-
isotig00998	probable lrr receptor-like serine threonine-protein kinase mrh1-like	734	10	7.73973e-43	74.8%	4	C:plasma membrane; F:protein kinase activity; P:protein phosphorylation; F:ATP binding	-
isotig00999	nucleic acid binding	704	10	5.68944e-54	91.1%	6	C:cytoplasm; F:sequence-specific DNA binding transcription factor activity; F:nucleic acid binding; P:protein glycosylation; F:zinc ion binding; P:regulation of transcription, DNA-dependent	-
isotig01000	eukaryotic initiation factor iso-4f subunit p82-34	717	10	4.57755e-57	80.5%	8	C:cytoplasm; P:translational initiation; F:DNA binding; P:spread of virus in host, cell to cell; F:translation initiation factor activity; P:RNA metabolic process; C:nucleus; P:response to virus	-
isotig01001	actin depolymerizing	730	10	7.09527e-57	96.7%	10	P:response to oxidative stress; P:actin filament organization; C:mitochondrion; P:defense response to bacterium; P:defense response signaling pathway, resistance gene-dependent; F:actin binding; C:chloroplast; P:response to cadmium ion; C:nucleus; C:plasma membrane	-
isotig01002	histone h3	731	10	7.15296e-57	100.0%	6	P:glucose catabolic process; C:nucleosome; F:DNA binding; P:protein targeting; P:nucleosome assembly; C:nucleus	-
isotig01003	clathrin interactor epsin 1-like isoform 1	711	10	2.83602e-51	85.6%	4	P:protein targeting to vacuole; C:Golgi apparatus; C:actin filament; C:thylakoid	-
isotig01004	plastocyanin chloroplast	730	10	4.08058e-37	84.4%	4	F:copper ion binding; F:electron carrier activity; C:chloroplast thylakoid membrane; P:electron transport chain	-
isotig01005	l-ascorbate peroxidase chloroplastic-like isoform 2	728	10	5.26999e-103	88.4%	7	P:response to oxidative stress; F:heme binding; F:peroxidase activity; C:chloroplast; C:membrane; C:mitochondrion; P:oxidation-reduction process	EC:1.11.1.7
isotig01006	tyrosine-rich hydroxyproline-rich partial	727	7	5.42611e-33	7.35714e+13	1	C:cytoplasmic membrane-bounded vesicle	-
isotig01007	arginine decarboxylase	729	10	2.45844e-57	76.9%	12	P:response to jasmonic acid stimulus; P:response to wounding; P:response to cold; P:response to oxidative stress; P:arginine catabolic process; F:arginine decarboxylase activity; P:spermidine biosynthetic process; P:response to abscisic acid stimulus; P:putrescine biosynthetic process; P:response to salt stress; P:seed development; P:response to karrikin	EC:4.1.1.19
isotig01008	2-oxoglutarate malate translocator	728	10	6.35815e-90	96.4%	18	P:transmembrane transport; P:sodium ion transport; P:malate transport; P:cell growth; P:response to fructose stimulus; C:mitochondrion; P:response to salt stress; P:cellulose metabolic process; C:integral to membrane; F:oxaloacetate transmembrane transporter activity; F:alpha-ketoglutarate transmembrane transporter activity; C:chloroplast inner membrane; P:water transport; C:chloroplast thylakoid…	-
isotig01009	atfro7 fro7	726	10	1.00451e-95	88.7%	10	F:flavin adenine dinucleotide binding; F:NAD(P)H oxidase activity; F:ferric-chelate reductase activity; C:plasma membrane; F:electron carrier activity; F:iron ion binding; P:photosynthetic electron transport chain; C:integral to membrane; C:chloroplast; P:response to light stimulus	EC:1.6.3.1; EC:1.16.1.7
isotig01010	abc transporter b family member 1-like	727	10	2.08968e-101	94.8%	17	F:ferric-transporting ATPase activity; P:positive gravitropism; P:response to nematode; C:integral to membrane; P:anthocyanin accumulation in tissues in response to UV light; F:auxin efflux transmembrane transporter activity; P:photomorphogenesis; P:regulation of cell size; P:response to blue light; P:auxin efflux; F:xenobiotic-transporting ATPase activity; P:auxin polar transport; P:transmembran…	EC:3.6.3.30; EC:3.6.3.44
isotig01011	auxin-induced protein 5ng4-like	707	10	1.10041e-67	90.3%	6	P:secondary cell wall biogenesis; P:positive regulation of tryptophan metabolic process; C:plant-type vacuole membrane; P:unidimensional cell growth; P:positive regulation of auxin metabolic process; C:plasma membrane	-
isotig01012	cyclin-dependent protein kinase p34cdc2	715	10	7.2664e-91	98.2%	6	F:RNA polymerase II carboxy-terminal domain kinase activity; P:mitosis; P:protein phosphorylation; F:ATP binding; F:cyclin-dependent protein serine/threonine kinase activity; P:cell division	EC:2.7.11.23; EC:2.7.11.22
isotig01013	achain mature and translocatable forms of glyoxysomal malate dehydrogenase have different activities and stabilities but similar crystal structures	723	10	8.27478e-74	96.6%	11	P:glyoxylate cycle; F:L-malate dehydrogenase activity; C:chloroplast envelope; P:malate metabolic process; P:regulation of fatty acid beta-oxidation; P:tricarboxylic acid cycle; P:regulation of photorespiration; F:nucleotide binding; C:vacuole; C:glyoxysome; C:apoplast	EC:1.1.1.37
isotig01014	transducin wd40 domain-containing protein	706	10	8.82996e-88	92.1%	12	C:cytosol; P:response to starvation; P:protein import into peroxisome matrix; P:cellular macromolecule catabolic process; P:fatty acid beta-oxidation; C:organelle membrane; P:leaf senescence; P:autophagic cell death; F:phosphatidylinositol-3,5-bisphosphate binding; P:defense response to fungus; P:autophagy; C:nucleus	-
isotig01015	glycine-rich rna-binding protein	720	10	1.4636e-06	96.2%	39	P:gluconeogenesis; P:DNA duplex unwinding; P:carotenoid biosynthetic process; P:regulation of stomatal movement; P:water transport; P:etioplast organization; P:mRNA export from nucleus; P:response to chitin; P:response to salt stress; F:electron carrier activity; P:lignin biosynthetic process; P:defense response to fungus; C:chloroplast; F:single-stranded DNA binding; P:hyperosmotic response; C:p…	EC:1.2.1.44; EC:2.7.11.0
isotig01016	water dikinase	715	10	7.94798e-98	88.4%	10	P:protein autophosphorylation; P:starch catabolic process; P:carbohydrate phosphorylation; F:carbohydrate kinase activity; F:ATP binding; P:starch biosynthetic process; C:chloroplast stroma; P:plant-type cell wall organization; F:phosphoglucan, water dikinase activity; F:starch binding	EC:2.7.9.5
isotig01017	l-ascorbate oxidase homolog	718	10	1.96511e-112	94.0%	10	C:plant-type cell wall; F:copper ion binding; C:plasmodesma; P:plant-type cell wall cellulose metabolic process; F:L-ascorbate oxidase activity; P:cell wall pectin metabolic process; C:cytosol; C:apoplast; P:sterol biosynthetic process; P:oxidation-reduction process	EC:1.10.3.3
isotig01018	methionine sulfoxide reductase type	721	10	6.48769e-79	87.9%	3	P:oxidation-reduction process; P:protein metabolic process; F:peptide-methionine (S)-S-oxide reductase activity	EC:1.8.4.11
isotig01019	prolyl oligopeptidase-like protein	719	10	9.20499e-110	92.8%	3	P:proteolysis; F:serine-type endopeptidase activity; C:chloroplast stroma	EC:3.4.21.0
isotig01020	steroid binding	716	10	2.36479e-49	78.6%	9	C:plasma membrane; P:negative regulation of cell growth; F:heme binding; F:2-alkenal reductase [NAD(P)] activity; F:steroid binding; C:nucleus; C:endoplasmic reticulum; C:chloroplast thylakoid membrane; P:oxidation-reduction process	EC:1.3.1.74
isotig01021	60s ribosomal protein l10-like	715	10	1.82383e-110	98.2%	4	C:ribosome; F:structural constituent of ribosome; C:vacuolar membrane; P:translation	-
isotig01022	60s ribosomal protein l21	706	10	5.65155e-64	96.0%	6	C:nucleolus; F:structural constituent of ribosome; C:cytosolic large ribosomal subunit; C:chloroplast; P:translation; C:mitochondrion	-
isotig01023	rna-binding protein	695	10	1.9596e-54	77.4%	2	F:nucleic acid binding; F:nucleotide binding	-
isotig01024	cytochrome b6 f complex subunit v	720	10	3.49729e-06	94.5%	11	F:electron transporter, transferring electrons within cytochrome b6/f complex of photosystem II activity; P:electron transport chain; P:cytochrome complex assembly; C:photosystem I; C:mitochondrion; C:integral to membrane; F:metal ion binding; C:cytochrome b6f complex; C:cytoplasmic membrane-bounded vesicle; C:chloroplast thylakoid membrane; P:photosynthesis	-
isotig01025	kinase family protein	718	10	7.37862e-67	65.9%	3	P:phosphorylation; F:protein kinase activity; P:protein glycosylation	-
isotig01026	germin-like protein	718	10	2.23327e-47	88.4%	9	F:nutrient reservoir activity; F:receptor activity; C:plant-type cell wall; F:manganese ion binding; P:response to cold; C:extracellular matrix; P:auxin mediated signaling pathway; C:nucleus; C:apoplast	-
isotig01027	eukaryotic translation initiation factor 3	712	10	8.75356e-81	82.3%	9	F:translation initiation factor activity; P:translational initiation; P:mRNA modification; P:phosphatidylglycerol biosynthetic process; P:RNA-dependent DNA replication; P:stomatal complex morphogenesis; P:isopentenyl diphosphate biosynthetic process, methylerythritol 4-phosphate pathway; F:RNA-directed DNA polymerase activity; P:response to abscisic acid stimulus	EC:2.7.7.49
isotig01028	dnaj heat shock n-terminal domain-containing protein	709	10	1.08048e-73	90.6%	5	P:protein folding; C:cytosol; F:unfolded protein binding; P:response to stress; F:heat shock protein binding	-
isotig01029	cytochrome c biogenesis c	714	10	9.45422e-75	97.7%	6	P:respiratory chain complex IV assembly; P:cytochrome complex assembly; P:heme transport; F:heme transporter activity; C:membrane; C:mitochondrion	-
isotig01030	ethylene-responsive transcription	714	10	2.79578e-18	60.9%	6	C:plastid; P:regulation of transcription, DNA-dependent; P:transcription, DNA-dependent; C:nucleus; F:sequence-specific DNA binding transcription factor activity; F:DNA binding
isotig01031	apoptotic chromatin condensation inducer in the nucleus	705	10	3.45515e-50	87.2%	2	F:nucleic acid binding; C:mitochondrion	-
isotig01032	peptidase m1 family protein	706	10	8.99761e-86	91.2%	12	C:cytosol; F:zinc ion binding; P:methylglyoxal catabolic process to D-lactate; C:chloroplast envelope; F:aminopeptidase activity; P:proteolysis; F:metallopeptidase activity; C:chloroplast stroma; C:vacuole; P:response to cadmium ion; C:plasma membrane; C:apoplast	EC:3.4.11.0
isotig01033	gras family transcription factor	716	10	4.29967e-59	70.7%	2	P:transcription, DNA-dependent; C:intracellular part	-
isotig01034	rna recognition motif-containing protein	713	10	9.76092e-80	80.8%	8	C:nucleolus; P:leaf senescence; P:ethylene biosynthetic process; P:defense response; F:RNA binding; P:cell death; C:cytosol; F:nucleotide binding	-
isotig01035	early-responsive to dehydration stress-related protein	713	10	2.73803e-90	91.6%	6	C:plasma membrane; P:plant-type cell wall organization; P:starch biosynthetic process; P:plant-type cell wall biogenesis; P:positive regulation of catalytic activity; P:maltose metabolic process	-
isotig01036	mannitol transporter	688	10	5.31667e-75	85.3%	21	P:myo-inositol transport; F:glucose transmembrane transporter activity; P:mannitol transport; F:D-xylose transmembrane transporter activity; C:plasma membrane; P:D-xylose transport; P:sorbitol transport; P:galactose transport; F:mannitol transmembrane transporter activity; F:galactose transmembrane transporter activity; P:transmembrane transport; F:glycerol transmembrane transporter activity; P:D…	EC:1.3.1.74
isotig01037	root phototropism protein	702	10	7.53378e-93	87.6%	3	F:signal transducer activity; P:signal transduction; P:phototropism	-
isotig01038	actin depolymerizing factor 7	709	10	2.17113e-55	96.1%	10	P:response to oxidative stress; P:actin filament organization; C:mitochondrion; P:defense response to bacterium; P:defense response signaling pathway, resistance gene-dependent; F:actin binding; C:chloroplast; P:response to cadmium ion; C:nucleus; C:plasma membrane	-
isotig01039	elongation factor 1-alpha	713	10	2.64585e-93	96.9%	7	F:nucleotidyltransferase activity; F:translation elongation factor activity; P:translational elongation; P:GTP catabolic process; F:GTPase activity; C:cytoplasm; F:GTP binding	EC:2.7.7.0
isotig01040	---NA---	709	0			0	-
isotig01041	cinnamyl alcohol dehydrogenase-like protein	708	10	2.46116e-83	94.0%	7	F:mannitol dehydrogenase activity; P:lignin biosynthetic process; C:apoplast; F:cinnamyl-alcohol dehydrogenase activity; P:oxidation-reduction process; F:nucleotide binding; F:zinc ion binding	EC:1.1.1.255; EC:1.1.1.195
isotig01042	nadh dehydrogenase subunit 9	710	10	8.71305e-97	98.5%	5	C:mitochondrial inner membrane; C:respiratory chain; F:NADH dehydrogenase (ubiquinone) activity; C:thylakoid; P:electron transport chain	EC:1.6.5.3
isotig01043	protein	710	10	7.65073e-85	98.2%	5	C:nucleolus; F:structural constituent of ribosome; C:plasma membrane; C:cytosolic large ribosomal subunit; P:translation	-
isotig01044	ca2+-transporting atpase	707	10	9.29397e-75	91.0%	12	F:calcium-transporting ATPase activity; P:cellular manganese ion homeostasis; C:integral to endoplasmic reticulum membrane; P:manganese ion transport; F:metal ion binding; C:vacuolar membrane; P:ATP biosynthetic process; F:ATP binding; P:calcium ion transport; P:response to cadmium ion; P:response to manganese ion; C:plasma membrane	EC:3.6.3.8
isotig01045	fructose-6-phosphate 2-kinase fructose- -bisphosphatase	694	10	1.75278e-82	83.7%	9	P:fructose metabolic process; F:fructose-2,6-bisphosphate 2-phosphatase activity; F:6-phosphofructo-2-kinase activity; C:plasma membrane; P:phosphorylation; P:fructose 2,6-bisphosphate metabolic process; F:ATP binding; F:starch binding; C:cytosol	EC:3.1.3.46; EC:2.7.1.105
isotig01046	probable ccr4-associated factor 1 homolog 9-like	705	10	1.93249e-96	88.6%	15	P:RNA modification; P:ethylene biosynthetic process; F:nucleic acid binding; P:nuclear-transcribed mRNA poly(A) tail shortening; P:defense response to bacterium; P:response to wounding; P:respiratory burst involved in defense response; P:vegetative to reproductive phase transition of meristem; F:poly(A)-specific ribonuclease activity; P:response to chitin; P:abscisic acid mediated signaling pathw…	EC:3.1.13.4
isotig01047	beta-amyrin synthase	707	10	3.87769e-97	87.8%	12	F:arabidiol synthase activity; F:baruol synthase activity; P:tetracyclic triterpenoid biosynthetic process; F:marneral synthase activity; P:pentacyclic triterpenoid biosynthetic process; F:beta-amyrin synthase activity; P:tricyclic triterpenoid biosynthetic process; P:thalianol metabolic process; P:root development; F:lupeol synthase activity; F:thalianol synthase activity; F:cycloartenol synthas…	EC:5.4.99.8
isotig01048	protein	697	10	5.24442e-46	67.7%	7	C:Golgi apparatus; C:plasmodesma; C:plasma membrane; P:phosphorylation; F:protein kinase activity; C:cytosol; F:nucleotide binding	-
isotig01049	udp-galactose transporter 3	703	10	8.34375e-116	94.8%	14	P:UDP-glucose transport; C:integral to endoplasmic reticulum membrane; P:protein folding; F:UDP-glucose transmembrane transporter activity; F:UDP-galactose transmembrane transporter activity; C:integral to Golgi membrane; P:embryo sac development; P:response to heat; P:systemic acquired resistance; P:pollen development; P:endoplasmic reticulum unfolded protein response; P:UDP-galactose transmembr…	-
isotig01050	zinc finger	705	10	1.30592e-52	77.1%	4	C:cytoplasm; P:protein ubiquitination; F:zinc ion binding; F:protein binding	-
isotig01051	anthocyanidin reductase	702	10	2.49074e-96	90.3%	5	F:anthocyanidin reductase activity; P:negative regulation of flavonoid biosynthetic process; F:coenzyme binding; F:nucleotide binding; P:oxidation-reduction process	EC:1.3.1.77
isotig01052	ferredoxin-dependent glutamate synthase chloroplastic	701	10	2.18185e-108	96.1%	12	P:oxidation-reduction process; C:mitochondrion; F:glutamate synthase (ferredoxin) activity; P:response to light stimulus; C:chloroplast envelope; P:glutamate biosynthetic process; P:nitrogen compound metabolic process; C:chloroplast stroma; P:photorespiration; P:positive regulation of glycine hydroxymethyltransferase activity; C:membrane; C:apoplast	EC:1.4.7.1
isotig01053	elongation factor 1-	704	10	7.95576e-52	97.0%	12	F:translation elongation factor activity; F:sulfate adenylyltransferase (ATP) activity; C:mitochondrion; C:nucleolus; P:translational elongation; P:GTP catabolic process; F:GTPase activity; C:chloroplast; C:vacuole; P:response to cadmium ion; F:GTP binding; C:plasma membrane	EC:2.7.7.4
isotig01054	short-chain dehydrogenase tic chloroplastic-like	703	10	3.6299e-79	88.0%	6	F:protochlorophyllide reductase activity; C:chloroplast inner membrane; F:calmodulin binding; P:oxidation-reduction process; F:nucleotide binding; P:protein transport	EC:1.3.1.33
isotig01055	nadp-dependent alkenal double bond reductase p2	698	10	1.66587e-68	87.3%	9	P:response to oxidative stress; P:response to cadmium ion; C:plasma membrane; F:2-alkenal reductase [NAD(P)] activity; C:nucleus; F:zinc ion binding; C:cytosol; F:nucleotide binding; P:oxidation-reduction process	EC:1.3.1.74
isotig01056	phi class glutathione s-transferase protein	703	10	3.32705e-64	81.1%	9	P:defense response; P:response to other organism; P:response to metal ion; P:response to abiotic stimulus; F:transition metal ion binding; F:glutathione transferase activity; C:cell periphery; C:chloroplast; C:membrane	EC:2.5.1.18
isotig01057	ferredoxin-dependent glutamate synthase	699	10	2.64394e-106	95.9%	12	P:oxidation-reduction process; C:mitochondrion; F:glutamate synthase (ferredoxin) activity; P:response to light stimulus; C:chloroplast envelope; P:glutamate biosynthetic process; P:nitrogen compound metabolic process; C:chloroplast stroma; P:photorespiration; P:positive regulation of glycine hydroxymethyltransferase activity; C:membrane; C:apoplast	EC:1.4.7.1
isotig01058	crt dre binding factor	688	10	7.10889e-56	81.9%	4	F:sequence-specific DNA binding transcription factor activity; F:DNA binding; C:nucleus; P:regulation of transcription, DNA-dependent	-
isotig01059	fructose- -bisphosphatase	695	10	2.15073e-71	96.3%	8	P:sucrose biosynthetic process; P:response to fructose stimulus; F:fructose 1,6-bisphosphate 1-phosphatase activity; P:starch catabolic process; P:response to abscisic acid stimulus; P:photosynthesis; C:nucleus; P:fructose 1,6-bisphosphate metabolic process	EC:3.1.3.11
isotig01060	prenylated rab acceptor	699	10	1.6265e-55	89.1%	4	C:cytosol; C:endoplasmic reticulum; C:Golgi apparatus; P:vesicle-mediated transport	-
isotig01061	probable nucleoredoxin 2	689	10	2.07751e-83	83.5%	3	F:metal ion binding; C:intracellular; P:intracellular signal transduction	-
isotig01062	peroxisomal targeting signal 1 receptor	691	10	2.58034e-98	95.6%	2	F:receptor activity; P:response to auxin stimulus	-
isotig01063	yabby protein	673	10	9.11625e-75	90.3%	0	-
isotig01064	cytochrome p450	696	10	5.20805e-70	88.6%	4	F:heme binding; F:flavonoid 3',5'-hydroxylase activity; F:electron carrier activity; P:oxidation-reduction process	EC:1.14.13.88
isotig01065	atp-dependent zinc metalloprotease ftsh chloroplastic mitochondrial-like	677	10	1.37439e-72	82.8%	13	C:mitochondrion; P:regulation of protein localization; C:chloroplast envelope; P:PSII associated light-harvesting complex II catabolic process; F:ATP-dependent peptidase activity; P:response to heat; F:metalloendopeptidase activity; P:proteolysis; F:ATP binding; F:microtubule-severing ATPase activity; P:glucosinolate biosynthetic process; P:response to high light intensity; C:membrane	EC:3.4.24.0; EC:3.6.4.3
isotig01066	hsp40 domain-containing protein	673	10	8.44186e-36	69.8%	3	P:protein folding; F:protein binding; C:plasma membrane	-
isotig01067	translocase of chloroplast chloroplastic-like	688	10	1.11884e-66	86.2%	7	C:cytosol; F:transmembrane signaling receptor activity; F:protein binding; F:GTPase activity; P:protein targeting to chloroplast; C:chloroplast outer membrane; F:GTP binding	-
isotig01068	chloroplast ribose-5-phosphate isomerase	689	10	2.95567e-85	88.5%	6	F:ribose-5-phosphate isomerase activity; P:defense response to bacterium; C:chloroplast envelope; P:pentose-phosphate shunt, non-oxidative branch; C:chloroplast thylakoid membrane; C:chloroplast stroma	EC:5.3.1.6
isotig01069	nadh dehydrogenase subunit 6	696	10	1.72252e-57	99.8%	4	C:integral to membrane; C:mitochondrion; P:oxidation-reduction process; F:NADH dehydrogenase (ubiquinone) activity	EC:1.6.5.3
isotig01070	porin voltage-dependent anion-selective channel protein	668	10	2.01828e-63	90.8%	15	P:transmembrane transport; P:regulation of anion transport; P:regulation of seed germination; C:cell wall; F:porin activity; C:nucleolus; P:defense response to bacterium; P:response to cold; C:chloroplast envelope; C:mitochondrial outer membrane; C:vacuolar membrane; P:aerobic respiration; F:voltage-gated anion channel activity; C:pore complex; C:plasma membrane	-
isotig01071	cc-nbs-lrr resistance protein	689	10	2.34188e-08	55.2%	2	P:defense response; F:ADP binding
isotig01072	cc-nbs-lrr resistance protein	680	10	2.00883e-50	69.8%	2	P:defense response; F:ADP binding
isotig01073	psi reaction center subunit ii	695	10	6.09812e-71	88.0%	5	C:plastoglobule; C:chloroplast envelope; C:photosystem I reaction center; P:photosynthesis; C:chloroplast thylakoid membrane	-
isotig01074	pyruvate cytosolic isozyme-like	688	10	8.00264e-109	96.7%	7	F:pyruvate kinase activity; P:response to cadmium ion; C:plasma membrane; P:phosphorylation; F:potassium ion binding; F:magnesium ion binding; P:glycolysis	EC:2.7.1.40
isotig01075	rna polymerase ii transcription mediator	692	10	2.44821e-80	84.1%	9	P:regulation of transcription from RNA polymerase II promoter; C:plasmodesma; F:protein binding; F:RNA polymerase II transcription cofactor activity; P:protein glycosylation; P:gravitropism; P:positive regulation of cell proliferation; C:mediator complex; P:positive regulation of transcription, DNA-dependent	-
isotig01076	auxin-responsive protein	692	10	7.89391e-71	85.1%	5	C:integral to membrane; C:plasmodesma; P:multicellular organismal development; F:monooxygenase activity; C:plasma membrane	-
isotig01077	---NA---	669	0			0	-
isotig00078	nadh dehydrogenase subunit 7	3098	10	0.0	98.8%	5	F:NAD binding; C:mitochondrion; F:oxidoreductase activity, acting on NAD(P)H; P:oxidation-reduction process; F:quinone binding	-
isotig00079	nadh dehydrogenase subunit 5	4962	10	1.58321e-59	97.4%	4	F:NADH dehydrogenase (ubiquinone) activity; C:mitochondrial respiratory chain complex I; C:integral to membrane; P:ATP synthesis coupled electron transport	EC:1.6.5.3
isotig00080	nadh dehydrogenase subunit 5	3904	10	3.31559e-89	97.1%	5	C:mitochondrial inner membrane; C:respiratory chain; F:NADH dehydrogenase (ubiquinone) activity; C:integral to membrane; P:ATP synthesis coupled electron transport	EC:1.6.5.3
isotig00081	nadh dehydrogenase subunit 5	2007	10	3.07949e-66	98.7%	4	F:NADH dehydrogenase (ubiquinone) activity; C:mitochondrial respiratory chain complex I; C:integral to membrane; P:ATP synthesis coupled electron transport	EC:1.6.5.3
isotig00082	nadh dehydrogenase subunit 5	949	10	5.62325e-86	98.2%	5	C:mitochondrial inner membrane; C:respiratory chain; F:NADH dehydrogenase (ubiquinone) activity; C:integral to membrane; P:ATP synthesis coupled electron transport	EC:1.6.5.3
isotig00083	zinc finger ccch domain-containing protein	2328	10	0.0	75.2%	5	P:defense response to fungus; F:nucleic acid binding; P:response to chitin; F:zinc ion binding; P:response to cold	-
isotig00084	zinc finger ccch domain-containing protein	2288	10	0.0	75.1%	5	P:defense response to fungus; F:nucleic acid binding; P:response to chitin; F:zinc ion binding; P:response to cold	-
isotig00085	zinc finger ccch domain-containing protein	2053	10	0.0	73.8%	2	P:response to stress; F:binding	-
isotig00086	zinc finger ccch domain-containing protein	2013	10	0.0	72.9%	2	F:zinc ion binding; F:nucleic acid binding	-
isotig00087	tcp-1 cpn60 chaperonin family protein	1979	10	0.0	88.1%	6	F:ATP binding; C:chloroplast stroma; P:protein refolding; C:membrane; C:cytosol; C:mitochondrion	-
isotig01078	---NA---	668	0			0	-
isotig01079	---NA---	687	0			0	-
isotig01080	short chain alcohol	688	10	4.39219e-74	76.2%	3	P:oxidation-reduction process; F:androstan-3-alpha,17-beta-diol dehydrogenase activity; F:nucleotide binding	EC:1.1.1.53
isotig01081	26s proteasome non-atpase regulatory subunit	669	10	4.45732e-60	94.2%	1	C:proteasome complex	-
isotig01082	psi reaction center subunit ii	687	10	1.76241e-70	98.1%	5	C:plastoglobule; C:chloroplast envelope; C:photosystem I reaction center; P:photosynthesis; C:chloroplast thylakoid membrane	-
isotig01083	microtubule associated protein type 2	687	10	8.53222e-86	98.1%	5	F:microtubule binding; C:cortical microtubule, transverse to long axis; C:plasma membrane; P:xylem and phloem pattern formation; P:plant-type cell wall biogenesis	-
isotig01084	uncharacterized protein mitochondrial-like	670	10	3.62104e-86	94.6%	6	C:plasma membrane; C:vacuolar membrane; C:mitochondrial respiratory chain complex I; F:transferase activity; C:chloroplast; P:response to salt stress	-
isotig01085	pyrophosphate-dependent phosphofructokinase beta subunit	687	10	1.07933e-80	92.2%	11	C:cell wall; C:6-phosphofructokinase complex; F:6-phosphofructokinase activity; F:diphosphate-fructose-6-phosphate 1-phosphotransferase activity; F:ATP binding; P:glycolysis; P:phosphorylation; P:photosynthesis; P:response to cadmium ion; C:membrane; P:embryo development ending in seed dormancy	EC:2.7.1.11; EC:2.7.1.90
isotig01086	protein dek	677	10	1.1689e-55	85.6%	2	F:DNA binding; C:intracellular	-
isotig01087	actin 1	684	10	5.38156e-64	99.0%	3	C:cytoskeleton; C:cytoplasm; F:ATP binding	-
isotig01088	protein	684	10	3.00706e-83	91.1%	2	C:plant-type cell wall; P:response to brassinosteroid stimulus	-
isotig01089	dna-binding protein	665	10	2.52418e-32	86.2%	1	F:DNA binding	-
isotig01090	rna polymerase-associated protein ctr9 homolog	686	10	2.15969e-105	89.9%	23	P:G2 phase of mitotic cell cycle; P:gravitropism; P:methylation-dependent chromatin silencing; P:chromatin silencing by small RNA; P:reciprocal meiotic recombination; C:membrane; P:histone H3-K9 methylation; P:protein deubiquitination; P:negative regulation of flower development; P:positive regulation of organelle organization; P:regulation of chromosome organization; P:production of siRNA involv…	-
isotig01091	ring u-box domain-containing protein	683	10	2.23008e-78	81.7%	2	P:wax biosynthetic process; F:zinc ion binding	-
isotig01092	rna binding protein	673	10	2.73221e-97	95.7%	65	P:sugar mediated signaling pathway; P:embryo development ending in seed dormancy; P:gibberellin biosynthetic process; P:salicylic acid biosynthetic process; P:leaf morphogenesis; P:carotenoid biosynthetic process; C:peroxisome; P:photorespiration; P:response to red light; P:regulation of plant-type hypersensitive response; P:response to chitin; P:positive regulation of translation; P:response to …	-
isotig01093	zinc finger a20 and an1 domain-containing stress-associated protein 4	679	10	6.44377e-38	70.8%	8	P:regulation of plant-type hypersensitive response; P:intracellular signal transduction; C:intracellular; F:metal ion binding; P:respiratory burst involved in defense response; P:positive regulation of flavonoid biosynthetic process; P:response to chitin; P:protein targeting to membrane	-
isotig01094	cysteine protease	684	10	4.24494e-45	89.0%	8	C:vacuole; F:2-alkenal reductase [NAD(P)] activity; C:chloroplast; P:proteolysis; C:apoplast; P:response to salt stress; F:cysteine-type peptidase activity; P:oxidation-reduction process	EC:1.3.1.74
isotig01095	flavonol synthase	668	10	7.8599e-76	83.0%	8	C:cytoplasm; F:naringenin 3-dioxygenase activity; F:flavonol synthase activity; F:L-ascorbic acid binding; F:iron ion binding; F:oxidoreductase activity, acting on single donors with incorporation of molecular oxygen, incorporation of two atoms of oxygen; P:flavonol biosynthetic process; P:oxidation-reduction process	EC:1.14.11.9; EC:1.14.11.23; EC:1.13.11.0
isotig01096	20s proteasome beta subunit 5	672	10	3.36437e-86	95.1%	5	C:cytoplasm; C:proteasome core complex; C:nucleus; F:threonine-type endopeptidase activity; P:proteolysis involved in cellular protein catabolic process	EC:3.4.25.0
isotig01097	nucleic acid binding	678	10	3.85528e-83	83.8%	4	P:protein import into nucleus; F:RNA binding; F:ubiquitin thiolesterase activity; C:cytosol	EC:3.1.2.15
isotig01098	dead-box atp-dependent rna helicase 7-like	679	10	6.21241e-49	87.1%	7	C:nucleolus; F:ATP-dependent helicase activity; F:RNA binding; P:RNA methylation; F:ATP binding; P:protein maturation; F:DEAD/H-box RNA helicase binding	-
isotig01099	u4 u6 small nuclear ribonucleoprotein prp31-like	667	10	8.06343e-79	91.5%	2	F:nucleic acid binding; C:ribonucleoprotein complex	-
isotig01100	pectate lyase	678	10	3.21911e-104	96.8%	13	P:multidimensional cell growth; P:root hair elongation; P:polysaccharide biosynthetic process; P:cell tip growth; P:regulation of meristem growth; P:auxin polar transport; P:regulation of cell size; P:anthocyanin accumulation in tissues in response to UV light; F:pectate lyase activity; P:plant-type cell wall organization; P:plant-type cell wall biogenesis; C:membrane; P:pattern specification pro…	EC:4.2.2.2
isotig01101	global transcription factor group	676	10	8.12337e-30	82.4%	2	F:histone acetyltransferase activity; P:histone acetylation	EC:2.3.1.48
isotig01102	hypothetical protein VITISV_031913 [Vitis vinifera]	672	10	1.23121e-41	66.3%	2	P:DNA metabolic process; F:nucleic acid binding	-
isotig01103	proteasome subunit alpha type-3	664	10	1.5592e-81	86.4%	9	C:vacuole; P:response to cold; C:proteasome core complex, alpha-subunit complex; P:response to cadmium ion; C:plasma membrane; P:ubiquitin-dependent protein catabolic process; C:nucleus; C:apoplast; F:threonine-type endopeptidase activity	EC:3.4.25.0
isotig01104	phospholipid-transporting atpase 9-like	666	10	2.04111e-73	90.2%	9	C:integral to membrane; C:chloroplast envelope; F:ATPase activity, coupled to transmembrane movement of ions, phosphorylative mechanism; F:ATP binding; P:phospholipid transport; F:magnesium ion binding; F:phospholipid-translocating ATPase activity; P:cation transport; C:plasma membrane	EC:3.6.3.1
isotig01105	60s ribosomal protein	674	10	1.50536e-71	98.8%	4	F:structural constituent of ribosome; C:cytosolic large ribosomal subunit; P:translation; F:rRNA binding	-
isotig01106	60s ribosomal protein	668	10	4.04112e-60	92.9%	6	C:nucleolus; F:structural constituent of ribosome; C:plasma membrane; C:cell wall; C:cytosolic large ribosomal subunit; P:translation	-
isotig01107	protein	663	10	7.08577e-44	70.8%	0	-
isotig01108	aspartic proteinase	670	10	1.58948e-81	86.5%	6	P:lipid metabolic process; C:vacuole; P:response to cadmium ion; F:aspartic-type endopeptidase activity; P:proteolysis; P:response to salt stress	EC:3.4.23.0
isotig01109	wd repeat-containing	656	10	1.37896e-106	94.1%	0	-
isotig01110	anthranilate n-benzoyltransferase	676	10	5.85524e-23	54.3%	1	F:transferase activity	-
isotig01111	adenosine kinase 1	674	10	1.2841e-92	92.7%	33	P:response to fructose stimulus; C:vacuolar membrane; P:response to misfolded protein; P:photorespiration; P:gluconeogenesis; P:response to glucose stimulus; C:apoplast; P:response to sucrose stimulus; P:nucleotide phosphorylation; F:protein serine/threonine/tyrosine kinase activity; P:response to salt stress; P:proteasome core complex assembly; C:chloroplast; C:Golgi apparatus; C:cytosol; P:ubiq…	EC:2.7.112.1; EC:2.7.11.0; EC:2.7.1.20; EC:2.7.4.3
isotig01112	arginine serine-rich-splicing	672	10	3.96987e-32	88.3%	3	F:nucleic acid binding; F:nucleotide binding; C:plastid	-
isotig01113	60s ribosomal protein	671	10	4.32856e-79	96.6%	9	C:nucleolus; C:Golgi apparatus; F:structural constituent of ribosome; C:plasma membrane; C:cell wall; C:vacuolar membrane; C:cytosolic large ribosomal subunit; C:chloroplast; P:translation	-
isotig01114	jasmonate zim domain protein e	672	10	3.15882e-35	65.3%	0	-
isotig01115	allene oxide cyclase chloroplast	672	10	6.33929e-62	90.6%	10	C:chloroplast envelope; P:response to desiccation; P:response to cold; F:allene-oxide cyclase activity; C:plasma membrane; C:stromule; C:chloroplast stroma; C:chloroplast thylakoid membrane; P:response to salt stress; P:response to fungus	EC:5.3.99.6
isotig01116	par-1a protein	670	10	2.65052e-44	82.6%	0	-
isotig01117	methionyl-trna synthetase	663	10	5.58229e-59	89.8%	6	P:response to cadmium ion; P:methionyl-tRNA aminoacylation; F:ATP binding; F:methionine-tRNA ligase activity; C:cytosol; F:tRNA binding	EC:6.1.1.10
isotig01118	nascent polypeptide-associated complex subunit beta	642	10	1.77482e-25	72.3%	3	C:cytoplasmic membrane-bounded vesicle; P:defense response; F:ADP binding	-
isotig01119	---NA---	664	0			0	-
isotig01120	tonoplast intrinsic	667	10	2.59501e-84	94.4%	4	P:transmembrane transport; C:integral to membrane; P:water transport; F:transporter activity	-
isotig01121	rieske iron-sulphur protein precursor	667	10	1.25702e-76	89.2%	14	F:electron transporter, transferring electrons within cytochrome b6/f complex of photosystem II activity; P:electron transport chain; F:ubiquinol-cytochrome-c reductase activity; F:2 iron, 2 sulfur cluster binding; C:integral to membrane; P:defense response to bacterium; F:metal ion binding; P:nonphotochemical quenching; C:chloroplast envelope; C:thylakoid membrane; F:plastoquinol--plastocyanin r…	EC:1.10.2.2; EC:1.10.99.1
isotig01122	callose synthase	665	10	2.4055e-82	82.7%	15	P:microtubule cytoskeleton organization; P:methylation-dependent chromatin silencing; P:chromatin silencing by small RNA; P:cell-cell signaling; P:cytokinesis by cell plate formation; P:histone H3-K9 methylation; P:membrane fusion; P:microsporogenesis; P:(1->3)-beta-D-glucan biosynthetic process; P:production of miRNAs involved in gene silencing by miRNA; P:production of ta-siRNAs involved in RNA…	EC:2.4.1.34
isotig01123	ubiquitin carrier protein	660	10	2.53099e-59	98.4%	3	F:ATP binding; F:ubiquitin-protein ligase activity; P:protein ubiquitination	EC:6.3.2.19
isotig01124	miraculin-like protein 2	666	10	7.81035e-49	81.1%	2	F:endopeptidase inhibitor activity; P:negative regulation of endopeptidase activity	-
isotig01125	uncharacterized protein loc100248068	660	10	7.8254e-24	57.6%	0	-
isotig01126	coatomer subunit beta -2-like	660	10	1.39655e-82	95.1%	5	F:myosin heavy chain kinase activity; C:membrane coat; P:vesicle-mediated transport; P:intracellular protein transport; F:structural molecule activity	EC:2.7.11.7
isotig01127	thioredoxin chloroplastic-like	658	10	2.3863e-42	91.9%	13	P:response to oxidative stress; P:glycerol ether metabolic process; C:cell wall; F:enzyme activator activity; P:cell redox homeostasis; C:chloroplast envelope; F:electron carrier activity; F:enzyme inhibitor activity; P:negative regulation of catalytic activity; C:chloroplast thylakoid membrane; P:positive regulation of catalytic activity; F:protein disulfide oxidoreductase activity; P:regulation…	-
isotig01128	thi4_citsi ame: full=thiamine thiazole chloroplastic ame: full=thiazole biosynthetic enzyme flags: precursor	653	10	4.12336e-89	93.4%	11	P:oxazole or thiazole biosynthetic process; F:zinc ion binding; C:mitochondrion; P:response to cold; C:chloroplast envelope; C:thylakoid; P:thiamine biosynthetic process; C:chloroplast stroma; F:protein homodimerization activity; C:stromule; P:response to DNA damage stimulus	-
isotig01129	e3 ubiquitin-protein ligase atl6-like	656	10	1.08538e-41	70.5%	1	F:metal ion binding	-
isotig01130	alternative oxidase	663	10	5.09265e-109	97.2%	10	F:metal ion binding; P:cellular respiration; P:response to cold; P:respiratory gaseous exchange; C:respiratory chain; C:mitochondrial envelope; F:alternative oxidase activity; C:integral to membrane; P:mitochondria-nucleus signaling pathway; P:electron transport chain	-
isotig01131	cwc15-like protein	662	10	2.10143e-54	92.9%	2	C:spliceosomal complex; P:mRNA splicing, via spliceosome	-
isotig01132	predicted protein [Populus trichocarpa]	626	2	2.03483e-16	62.5%	3	F:nucleic acid binding; F:zinc ion binding; C:intracellular
isotig01133	sensory transduction histidine	661	10	6.99558e-50	62.3%	1	P:regulation of cellular process	-
isotig01134	serine threonine-protein kinase	661	10	4.85584e-43	85.2%	4	F:RNA polymerase II carboxy-terminal domain kinase activity; C:plasma membrane; P:protein phosphorylation; F:ATP binding	EC:2.7.11.23
isotig01135	ap2 erf domain-containing transcription factor	651	10	6.16662e-51	66.5%	1	P:transcription, DNA-dependent	-
isotig01136	calmodulin	656	10	1.82199e-66	97.8%	14	C:cytosol; P:oxidation-reduction process; F:calcium ion binding; F:O-methyltransferase activity; P:regulation of photomorphogenesis; P:acetyl-CoA metabolic process; P:detection of calcium ion; F:protein binding; F:2-alkenal reductase [NAD(P)] activity; P:pollen germination; C:vacuole; P:calcium-mediated signaling; C:plasma membrane; P:response to mechanical stimulus	EC:1.3.1.74
isotig01137	beta-amylase chloroplastic-like	658	10	4.7749e-67	78.9%	6	P:response to water deprivation; F:cation binding; F:beta-amylase activity; P:starch catabolic process; C:nucleus; C:cytosol	EC:3.2.1.2
isotig01138	nadh dehydrogenase subunit	661	4	2.9734e-08	85.5%	4	F:kinase activity; P:ATP synthesis coupled electron transport; F:phosphotransferase activity, alcohol group as acceptor; F:NADH dehydrogenase (ubiquinone) activity	EC:2.7.1.0; EC:1.6.5.3
isotig01139	ap2 erf domain-containing transcription factor	657	10	1.40223e-34	65.2%	1	P:transcription, DNA-dependent	-
isotig01140	high chlorophyll fluorescence phenotype 173 protein	650	10	2.43737e-53	70.6%	5	C:chloroplast envelope; P:translational initiation; P:protein autophosphorylation; P:regulation of proton transport; C:chloroplast stroma	-
isotig01141	anthranilate n-benzoyltransferase	658	10	7.07272e-47	73.7%	1	F:transferase activity, transferring acyl groups other than amino-acyl groups	EC:2.3.1.0
isotig01142	uncharacterized protein loc100244902 isoform 1	657	10	7.74416e-25	61.0%	0	-
isotig01143	salt tolerance-like protein	654	10	1.01724e-85	86.4%	5	P:response to karrikin; P:response to salt stress; C:nucleus; P:photomorphogenesis; F:zinc ion binding	-
isotig01144	isoflavone reductase homolog	658	10	3.58172e-73	88.0%	1	F:nucleotide binding	-
isotig01145	cc-nbs-lrr resistance protein	647	10	1.37249e-14	62.5%	1	F:nucleotide binding	-
isotig01146	protein	654	10	1.98527e-81	96.7%	7	C:nucleolus; F:structural constituent of ribosome; C:plasma membrane; C:cell wall; C:cytosolic small ribosomal subunit; C:chloroplast; P:translation	-
isotig01147	t-complex protein 1 subunit theta	648	10	3.10106e-47	69.3%	4	P:protein folding; C:cytoplasm; F:unfolded protein binding; F:ATP binding	-
isotig01148	60s ribosomal protein	653	10	5.45679e-47	98.4%	4	C:nucleolus; F:structural constituent of ribosome; C:cytosolic large ribosomal subunit; P:translation	-
isotig01149	tetratricopeptide-like helical domain-containing protein	654	10	1.75946e-39	70.5%	0	-
isotig01150	24-sterol c-methyltransferase	643	10	3.22836e-105	96.9%	13	P:multidimensional cell growth; P:brassinosteroid biosynthetic process; P:glucose catabolic process; C:cytosol; P:isopentenyl diphosphate biosynthetic process, methylerythritol 4-phosphate pathway; P:acetyl-CoA metabolic process; P:methylation; P:xylem and phloem pattern formation; P:negative regulation of DNA endoreduplication; F:24-methylenesterol C-methyltransferase activity; C:endoplasmic ret…	EC:2.1.1.143
isotig01151	clathrin heavy chain 1-like	644	10	5.17455e-10	96.4%	7	P:vesicle-mediated transport; C:clathrin coat of coated pit; C:clathrin coat of trans-Golgi network vesicle; C:vacuolar membrane; P:intracellular protein transport; F:structural molecule activity; C:chloroplast	-
isotig01152	e3 ubiquitin-protein ligase upl2-like	644	10	5.60296e-82	87.4%	3	C:intracellular; P:cellular protein modification process; F:acid-amino acid ligase activity	EC:6.3.2.0
isotig01153	proliferation-associated protein 2g4-like	644	10	4.15524e-76	94.7%	6	C:nucleolus; F:metalloexopeptidase activity; C:plasma membrane; F:aminopeptidase activity; P:cellular process; P:proteolysis	EC:3.4.11.0
isotig01154	atpase beta subunit	638	10	2.32904e-31	90.7%	19	F:proton-transporting ATPase activity, rotational mechanism; C:chloroplast envelope; F:zinc ion binding; F:hydrogen-exporting ATPase activity, phosphorylative mechanism; F:proton-transporting ATP synthase activity, rotational mechanism; P:ATP hydrolysis coupled proton transport; C:nucleolus; F:cobalt ion binding; C:mitochondrial respiratory chain complex I; C:mitochondrial proton-transporting ATP…	EC:3.6.3.6
isotig01155	dehydroascorbate reductase	652	10	4.42271e-81	87.5%	3	F:transferase activity; P:oxidation-reduction process; F:glutathione dehydrogenase (ascorbate) activity	EC:1.8.5.1
isotig01156	calmodulin binding	644	10	4.80965e-32	73.6%	2	P:zinc ion transport; P:cellular process	-
isotig01157	duf246 domain-containing protein at1g04910-like	626	10	7.66094e-48	68.6%	3	F:hydrogen ion transmembrane transporter activity; P:ATP synthesis coupled proton transport; C:proton-transporting ATP synthase complex, coupling factor F(o)
isotig01158	protein	639	10	2.49491e-73	93.3%	4	P:response to cadmium ion; F:nucleotide binding; F:RNA binding; P:response to salt stress	-
isotig01159	protein	645	10	9.62393e-57	69.4%	2	C:membrane; C:intracellular	-
isotig01160	ethylene-responsive element binding protein 1	646	1	1744.39	61.0%	5	P:regulation of transcription, DNA-dependent; P:transcription, DNA-dependent; C:nucleus; F:sequence-specific DNA binding transcription factor activity; F:DNA binding
isotig01161	pre-mrna-splicing factor atp-dependent rna helicase prp16	646	10	1.49513e-33	60.4%	2	F:binding; F:helicase activity	-
isotig01162	---NA---	641	0			0	-
isotig01163	phosphoenolpyruvate carboxylase	642	10	1.19099e-91	93.1%	3	P:tricarboxylic acid cycle; F:phosphoenolpyruvate carboxylase activity; P:carbon fixation	EC:4.1.1.31
isotig01164	germin-like protein	644	10	6.35582e-51	81.5%	18	F:nutrient reservoir activity; P:oxidation-reduction process; P:L-fucose biosynthetic process; P:stomatal complex morphogenesis; F:manganese ion binding; F:oxalate oxidase activity; P:response to cold; F:superoxide dismutase activity; F:receptor activity; F:GDP-L-fucose synthase activity; C:plant-type cell wall; P:cellular cation homeostasis; P:L-ascorbic acid biosynthetic process; C:extracellula…	EC:1.2.3.4; EC:1.15.1.1; EC:1.1.1.271
isotig01165	---NA---	642	0			0	-
isotig01166	glutathione s-transferase	642	10	2.71895e-39	83.3%	9	P:de-etiolation; P:lateral root development; P:response to cadmium ion; P:glutathione metabolic process; P:response to growth hormone stimulus; F:transferase activity; C:chloroplast; F:lactoylglutathione lyase activity; P:response to karrikin	EC:4.4.1.5
isotig01167	protein	641	10	1.39464e-07	87.5%	1	F:copper ion binding	-
isotig01168	constans-like zinc finger protein	640	10	2.51233e-49	72.3%	4	C:intracellular; P:cellular response to water deprivation; F:zinc ion binding; P:regulation of transcription, DNA-dependent	-
isotig01169	protein thylakoid chloroplastic-like	642	10	1.76205e-42	91.5%	13	C:plastid outer membrane; C:chloroplast envelope; P:protein import into chloroplast thylakoid membrane; P:thylakoid membrane organization; C:chloroplast thylakoid membrane; C:photosystem II; C:chloroplast stroma; P:photosynthesis; P:G-protein coupled receptor signaling pathway; P:protein import into chloroplast stroma; P:sugar mediated signaling pathway; C:plastid inner membrane; C:stromule	-
isotig01170	malate dehydrogenase	636	10	6.48868e-42	95.7%	5	P:cellular carbohydrate metabolic process; F:L-malate dehydrogenase activity; P:malate metabolic process; P:tricarboxylic acid cycle; F:nucleotide binding	EC:1.1.1.37
isotig01171	---NA---	641	0			0	-
isotig01172	cyclin t1	627	10	4.48086e-56	89.3%	3	F:protein kinase binding; P:regulation of cyclin-dependent protein serine/threonine kinase activity; P:regulation of transcription, DNA-dependent	-
isotig01173	nad dependent epimerase	641	10	2.92671e-98	92.0%	9	C:plastoglobule; C:chloroplast envelope; F:poly(U) RNA binding; P:rRNA processing; F:coenzyme binding; C:thylakoid; C:apoplast; F:catalytic activity; F:nucleotide binding	-
isotig01174	regulatory particle triple-a atpase 6a	633	10	2.34976e-92	99.0%	7	C:proteasome regulatory particle, base subcomplex; F:ATPase activity; C:plasma membrane; P:ubiquitin-dependent protein catabolic process; F:ATP binding; C:nucleus; C:cytosol	EC:3.6.1.3
isotig01175	dolichyl-diphosphooligosaccharide-protein glycosyltransferase subunit stt3a	637	10	1.17858e-91	95.7%	4	C:plasma membrane; P:protein glycosylation; F:dolichyl-diphosphooligosaccharide-protein glycotransferase activity; C:endoplasmic reticulum	EC:2.4.1.119
isotig01176	methyltransferase pmt8	632	10	1.66991e-83	94.5%	12	P:multidimensional cell growth; P:root hair elongation; F:zinc ion binding; P:polysaccharide biosynthetic process; P:cell tip growth; P:cell wall organization; P:methylation; C:vacuolar membrane; P:anthocyanin accumulation in tissues in response to UV light; P:regulation of hormone levels; F:methyltransferase activity; C:Golgi apparatus	EC:2.1.1.0
isotig01177	beta-galactosidase like protein	637	10	4.53084e-52	88.7%	4	F:carbohydrate binding; F:beta-galactosidase activity; P:carbohydrate metabolic process; F:cation binding	EC:3.2.1.23
isotig00088	tcp-1 cpn60 chaperonin family protein	1961	10	0.0	88.1%	6	F:ATP binding; C:chloroplast stroma; P:protein refolding; C:membrane; C:cytosol; C:mitochondrion	-
isotig00089	isco large subunit-binding protein subunit beta	1393	10	0.0	91.3%	19	P:protein refolding; P:cell death; C:mitochondrion; C:nucleolus; P:chaperone mediated protein folding requiring cofactor; P:response to cold; C:chloroplast envelope; P:carotenoid biosynthetic process; P:systemic acquired resistance; P:chloroplast organization; P:ovule development; F:ATP binding; F:protein binding; C:chloroplast stroma; C:cytosolic ribosome; C:Golgi apparatus; C:plasma membrane; C…	-
isotig00090	tcp-1 cpn60 chaperonin family protein	1375	10	0.0	91.3%	17	P:protein refolding; P:cell death; C:mitochondrion; C:nucleolus; P:chaperone mediated protein folding requiring cofactor; P:response to cold; C:chloroplast envelope; P:systemic acquired resistance; P:chloroplast organization; P:ovule development; F:ATP binding; C:chloroplast stroma; C:cytosolic ribosome; C:Golgi apparatus; C:plasma membrane; C:stromule; C:apoplast	-
isotig00091	serine threonine-protein kinase	1273	10	6.65844e-32	56.6%	2	F:kinase activity; P:metabolic process	-
isotig00092	leucine-rich repeat receptor protein kinase exs-like	1172	10	4.69681e-34	65.7%	6	F:oxidoreductase activity; P:phosphorylation; F:protein kinase activity; C:chloroplast; C:membrane; F:nucleotide binding	-
isotig00093	probable lrr receptor-like serine threonine-protein kinase at4g36180-like	949	10	1.94393e-40	59.1%	2	F:kinase activity; P:metabolic process	-
isotig00094	probable lrr receptor-like serine threonine-protein kinase at4g36180-like	848	10	2.4989e-40	66.3%	5	F:oxidoreductase activity; P:phosphorylation; F:protein kinase activity; C:membrane; F:nucleotide binding	-
isotig00095	dtdp-glucose 4-6-	984	10	2.75887e-141	94.4%	6	P:cellular metabolic process; F:UDP-glucuronate decarboxylase activity; F:coenzyme binding; F:nucleotide binding; C:plasma membrane; P:D-xylose metabolic process	EC:4.1.1.35
isotig00096	dtdp-glucose 4-6-	958	10	1.19997e-155	95.6%	6	P:cellular metabolic process; F:UDP-glucuronate decarboxylase activity; F:coenzyme binding; F:nucleotide binding; C:plasma membrane; P:D-xylose metabolic process	EC:4.1.1.35
isotig00097	dtdp-glucose 4-6-	453	10	5.93916e-45	93.2%	4	P:cellular metabolic process; F:UDP-glucuronate decarboxylase activity; F:nucleotide binding; F:coenzyme binding	EC:4.1.1.35
isotig01178	alpha- -glucan-protein synthase	636	10	2.38269e-44	92.5%	5	C:cell junction; C:cell wall; P:cellulose biosynthetic process; F:glycogenin glucosyltransferase activity; P:cell wall organization	EC:2.4.1.186
isotig01179	peptidyl-prolyl cis-trans isomerase	635	10	6.25773e-60	88.1%	15	C:cytosol; F:peptide binding; P:root development; P:protein peptidyl-prolyl isomerization; C:multivesicular body; P:protein folding; C:plasmodesma; C:Golgi stack; C:membrane fraction; F:peptidyl-prolyl cis-trans isomerase activity; P:signal transduction; C:chloroplast; F:hydrolase activity; C:endoplasmic reticulum; C:plasma membrane	EC:5.2.1.8
isotig01180	60s ribosomal protein l24	619	10	1.97631e-40	95.3%	6	C:nucleolus; C:plasma membrane; C:cytosolic large ribosomal subunit; P:auxin mediated signaling pathway; C:chloroplast; P:gynoecium development	-
isotig01181	udp-glucuronic acid decarboxylase	630	10	2.31046e-77	96.7%	10	C:Golgi membrane; P:dTDP-rhamnose biosynthetic process; C:vacuole; F:UDP-glucuronate decarboxylase activity; P:D-xylose metabolic process; C:plasma membrane; F:coenzyme binding; C:cytosol; F:nucleotide binding; F:dTDP-glucose 4,6-dehydratase activity	EC:4.1.1.35; EC:4.2.1.46
isotig01182	rna polymerase beta subunit	627	10	6.94512e-41	91.5%	4	F:DNA-directed RNA polymerase activity; P:transcription, DNA-dependent; F:DNA binding; C:chloroplast	EC:2.7.7.6
isotig01183	atp binding	628	10	1.64907e-38	82.0%	0	-
isotig01184	ribosomal protein s4	631	10	9.65989e-14	97.2%	5	C:mitochondrial small ribosomal subunit; F:structural constituent of ribosome; C:chloroplast; P:translation; F:rRNA binding	-
isotig01185	f-box protein skip19	621	10	1.52024e-24	62.8%	2	P:ubiquitin-dependent protein catabolic process; F:ligase activity	-
isotig01186	elongation factor 1-alpha	629	10	5.66453e-91	100.0%	11	F:translation elongation factor activity; C:mitochondrion; C:nucleolus; P:translational elongation; P:GTP catabolic process; F:GTPase activity; C:chloroplast; C:vacuole; P:response to cadmium ion; F:GTP binding; C:plasma membrane	-
isotig01187	protein iq-domain 32-like	623	10	9.62918e-27	63.3%	0	-
isotig01188	gyf domain-containing protein	612	10	6.79833e-61	85.7%	1	P:response to abscisic acid stimulus	-
isotig01189	homeobox-leucine zipper protein athb-6	627	10	1.19213e-56	84.7%	4	F:sequence-specific DNA binding transcription factor activity; F:transcription regulatory region sequence-specific DNA binding; C:nucleus; P:regulation of transcription, DNA-dependent	-
isotig01190	uncharacterized protein at5g39570-like	627	10	3.56691e-38	57.4%	2	C:nucleus; C:cytosol	-
isotig01191	heat shock	628	10	5.51784e-76	97.9%	11	P:protein folding; P:response to high light intensity; C:plasma membrane; C:cell wall; P:response to arsenic-containing substance; F:ATP binding; P:response to hydrogen peroxide; F:unfolded protein binding; C:cytosol; P:response to heat; P:defense response to bacterium, incompatible interaction	-
isotig01192	rieske domain containing expressed	624	10	3.51954e-45	80.7%	5	C:chloroplast envelope; F:oxidoreductase activity; F:2 iron, 2 sulfur cluster binding; C:chloroplast thylakoid membrane; P:oxidation-reduction process	-
isotig01193	aspartic proteinase	626	10	8.46892e-81	89.9%	6	P:lipid metabolic process; C:vacuole; P:response to cadmium ion; F:aspartic-type endopeptidase activity; P:proteolysis; P:response to salt stress	EC:3.4.23.0
isotig01194	thioredoxin h-type 5	627	10	3.47714e-84	89.8%	10	P:response to water deprivation; C:chloroplast envelope; P:response to oxidative stress; F:electron carrier activity; P:cell redox homeostasis; F:protein binding; P:glycerol ether metabolic process; C:chloroplast stroma; C:chloroplast thylakoid; F:protein disulfide oxidoreductase activity	-
isotig01195	ribosomal protein s4	624	10	2.59777e-90	94.9%	5	C:mitochondrial small ribosomal subunit; F:structural constituent of ribosome; C:chloroplast; P:translation; F:rRNA binding	-
isotig01196	acetyl- carboxylase 1-like	624	10	6.21981e-92	95.4%	5	P:fatty acid biosynthetic process; F:metal ion binding; F:ATP binding; F:biotin carboxylase activity; F:acetyl-CoA carboxylase activity	EC:6.3.4.14; EC:6.4.1.2
isotig01197	chromatin remodeling complex subunit	619	10	8.85781e-79	97.6%	9	F:helicase activity; P:chromatin assembly or disassembly; F:DNA binding; C:plasmodesma; F:chromatin binding; F:ATP binding; F:transferase activity; C:nucleus; F:zinc ion binding	-
isotig01198	malate cytoplasmic	622	10	2.7196e-90	96.1%	13	F:L-malate dehydrogenase activity; P:response to salt stress; P:malate metabolic process; P:tricarboxylic acid cycle; P:cellular carbohydrate metabolic process; F:nucleotide binding; C:chloroplast stroma; P:response to zinc ion; C:vacuole; P:response to cadmium ion; C:nucleus; C:plasma membrane; C:apoplast	EC:1.1.1.37
isotig01199	hypothetical chloroplast rf19	622	10	1.79922e-57	69.5%	2	C:membrane; C:chloroplast	-
isotig01200	snf7 family protein	619	10	7.69983e-69	96.8%	9	P:protein targeting to vacuole; P:membrane fusion; P:endosome transport via multivesicular body sorting pathway; P:Golgi vesicle transport; P:embryonic axis specification; C:intracellular; P:embryo development ending in seed dormancy; P:heat acclimation; P:growth	-
isotig01201	nuclear receptor corepressor	621	10	2.61356e-51	78.5%	4	F:sequence-specific DNA binding transcription factor activity; C:nucleus; F:DNA binding; P:RNA splicing	-
isotig01202	multidrug resistance protein abc transporter family	619	10	9.60028e-93	97.0%	0	-
isotig01203	xyloglucan endotransglucosylase hydrolase	624	10	2.56811e-96	92.3%	6	P:response to water deprivation; F:xyloglucan:xyloglucosyl transferase activity; C:cell wall; P:cellular glucan metabolic process; F:xyloglucan-specific endo-beta-1,4-glucanase activity; C:apoplast	EC:2.4.1.207; EC:3.2.1.151
isotig01204	inositol or phosphatidylinositol	620	10	8.9125e-25	88.7%	3	F:protein histidine kinase binding; F:1-phosphatidylinositol 4-kinase activity; P:phosphatidylinositol phosphorylation	EC:2.7.1.67
isotig01205	at4g15470 dl3775w	622	10	3.70132e-63	84.9%	6	P:protein targeting to vacuole; P:membrane fusion; P:Golgi vesicle transport; P:endosomal transport; C:intracellular; C:integral to membrane	-
isotig01206	phosphate triose-phosphate translocator precursor	619	10	1.49576e-80	87.0%	4	C:integral to membrane; C:chloroplast envelope; P:transport; F:transporter activity	-
isotig01207	polyadenylate-binding protein 2	622	10	1.57619e-53	87.4%	4	P:response to cadmium ion; F:nucleotide binding; F:RNA binding; P:response to salt stress	-
isotig01208	protein	622	10	3.5498e-38	78.6%	5	P:pyrimidine ribonucleotide biosynthetic process; C:nucleus; C:cytosol; F:nucleotide binding; F:poly(A) RNA binding	-
isotig01209	actin 5	617	10	2.27114e-97	98.9%	7	C:cytoplasm; C:cytoskeleton; P:root hair elongation; C:plasma membrane; C:cell wall; F:ATP binding; C:nucleus	-
isotig01210	thylakoid membrane phosphoprotein	613	10	5.62646e-45	86.5%	11	P:pentose-phosphate shunt; C:chloroplast envelope; P:regulation of protein dephosphorylation; P:photosystem II assembly; C:chloroplast photosystem I; C:plastid chromosome; P:photosynthetic electron transport in photosystem I; F:DNA binding; P:response to abscisic acid stimulus; P:rRNA processing; P:thylakoid membrane organization	-
isotig01211	glycerate dehydrogenase	618	10	9.5641e-88	97.9%	7	F:NAD binding; C:peroxisome; F:poly(U) RNA binding; C:chloroplast; C:apoplast; F:glycerate dehydrogenase activity; P:oxidation-reduction process	EC:1.1.1.29
isotig01212	21 kda protein	621	10	5.36954e-46	83.4%	8	F:pectinesterase activity; F:heme binding; P:negative regulation of catalytic activity; F:oxidoreductase activity, acting on paired donors, with incorporation or reduction of molecular oxygen; F:monooxygenase activity; F:electron carrier activity; P:oxidation-reduction process; F:enzyme inhibitor activity	EC:3.1.1.11
isotig01213	uncharacterized hydrolase yugf-like	614	10	4.40703e-60	94.6%	9	C:chloroplast envelope; F:methyl indole-3-acetate esterase activity; F:carboxylesterase activity; P:starch biosynthetic process; P:positive regulation of catalytic activity; F:retinyl-palmitate esterase activity; P:maltose metabolic process; F:methyl salicylate esterase activity; F:methyl jasmonate esterase activity	EC:3.1.1.1; EC:3.1.1.21
isotig01214	sec61 transport protein	619	10	1.37785e-95	98.6%	4	F:P-P-bond-hydrolysis-driven protein transmembrane transporter activity; C:plasma membrane; C:mitochondrion; P:protein transport	-
isotig01215	phosphatidylinositol:ceramide inositolphosphotransferase	614	10	2.78319e-47	88.6%	2	P:sphingolipid biosynthetic process; F:inositol phosphoceramide synthase activity	-
isotig01216	e3 ubiquitin-protein ligase ubr4	609	10	9.11155e-75	92.1%	13	C:cytosol; F:zinc ion binding; P:response to fungus; C:plasmodesma; P:auxin polar transport; P:photomorphogenesis; P:lateral root formation; P:response to auxin stimulus; F:ubiquitin-protein ligase activity; P:protein ubiquitination; P:indeterminate inflorescence morphogenesis; P:unidimensional cell growth; C:membrane	EC:6.3.2.19
isotig01217	lambda class glutathione transferase gstl2	619	10	1.87088e-76	84.6%	4	P:response to cadmium ion; C:cytoplasm; P:protein glutathionylation; F:glutathione transferase activity	EC:2.5.1.18
isotig01218	protein	614	10	4.78941e-56	78.1%	2	C:nucleus; F:zinc ion binding	-
isotig01219	40s ribosomal protein	614	10	4.54522e-83	98.1%	4	F:structural constituent of ribosome; C:small ribosomal subunit; P:translation; F:rRNA binding	-
isotig01220	elongation factor 1-gamma-like	610	10	1.52943e-69	80.7%	11	C:vacuole; F:translation elongation factor activity; C:eukaryotic translation elongation factor 1 complex; F:copper ion binding; P:response to cadmium ion; C:plasma membrane; P:response to zinc ion; C:cell wall; F:transferase activity; C:mitochondrion; P:translational elongation	-
isotig01221	mitochondrial-processing peptidase subunit alpha	609	10	4.37249e-63	89.5%	7	C:mitochondrial inner membrane; F:ubiquinol-cytochrome-c reductase activity; F:metalloendopeptidase activity; C:respiratory chain; P:proteolysis; F:zinc ion binding; P:electron transport chain	EC:1.10.2.2; EC:3.4.24.0
isotig01222	elongation factor 1-alpha 1	612	10	1.67205e-92	98.0%	6	F:translation elongation factor activity; P:translational elongation; P:GTP catabolic process; F:GTPase activity; C:cytoplasm; F:GTP binding	-
isotig01223	glucose-6-phosphate dehydrogenase	615	10	7.98594e-96	96.7%	4	F:NADP binding; F:glucose-6-phosphate dehydrogenase activity; C:chloroplast; P:pentose-phosphate shunt, oxidative branch	EC:1.1.1.49
isotig01224	tubby-like f-box protein 8-like	600	10	7.18225e-81	90.8%	2	F:hydrolase activity; C:plasma membrane	-
isotig01225	uncharacterized protein	609	10	3.9984e-38	74.8%	4	F:protein binding; P:chromoplast organization; P:carotene biosynthetic process; C:plastid	-
isotig01226	splicing factor 3a subunit 2-like	598	10	1.03636e-84	95.3%	3	F:nucleic acid binding; C:nucleus; F:zinc ion binding	-
isotig01227	monodehydroascorbate reductase	614	10	1.81947e-64	88.0%	5	P:cell redox homeostasis; F:flavin adenine dinucleotide binding; C:cytoplasm; P:oxidation-reduction process; F:monodehydroascorbate reductase (NADH) activity	EC:1.6.5.4
isotig01228	heat shock	610	10	2.30634e-94	96.8%	17	C:cytosol; P:response to water deprivation; C:mitochondrion; P:protein folding; P:response to salt stress; P:response to chlorate; C:chloroplast envelope; P:response to heat; C:vacuolar membrane; P:chloroplast organization; P:ovule development; F:ATP binding; C:chloroplast stroma; F:unfolded protein binding; P:de-etiolation; C:plasma membrane; P:embryo development ending in seed dormancy	-
isotig01229	e3 ubiquitin-protein ligase upl3-like	601	10	1.78492e-91	97.0%	9	P:protein desumoylation; C:intracellular; P:vegetative to reproductive phase transition of meristem; F:ubiquitin-protein ligase activity; P:protein ubiquitination involved in ubiquitin-dependent protein catabolic process; P:trichome branching; P:DNA endoreduplication; P:hydrogen peroxide biosynthetic process; C:plasma membrane	EC:6.3.2.19
isotig01230	photosystem ii 10 kda polypeptide	612	10	2.62182e-38	91.5%	3	P:photosynthesis; C:chloroplast thylakoid membrane; C:oxygen evolving complex	-
isotig01231	acidic leucine-rich nuclear phosphoprotein 32-related protein	608	10	1.84873e-51	91.6%	2	P:biological_process; C:cellular_component
isotig01232	gpi-anchored protein lorelei	601	10	5.62634e-45	78.3%	6	P:pollen tube reception; P:pollen tube guidance; C:plasma membrane; P:synergid death; C:pollen tube; P:double fertilization forming a zygote and endosperm	-
isotig01233	chloroplast cu zn superoxide dismutase	608	10	8.18035e-65	88.7%	4	F:metal ion binding; P:superoxide metabolic process; F:superoxide dismutase activity; P:oxidation-reduction process	EC:1.15.1.1
isotig01234	uncharacterized protein loc100245914	610	10	1.87457e-43	88.3%	2	P:trichome morphogenesis; C:apoplast	-
isotig01235	uncharacterized protein chloroplastic-like	607	10	3.79046e-38	82.6%	3	C:plastoglobule; C:chloroplast envelope; C:chloroplast thylakoid membrane	-
isotig01236	---NA---	604	0			0	-
isotig01237	60s ribosomal protein	604	10	1.64324e-59	100.0%	4	F:structural constituent of ribosome; C:cytosolic large ribosomal subunit; P:translation; F:rRNA binding	-
isotig01238	uncharacterized protein loc100262861	607	8	1.81153e-06	63.5%	0	-
isotig01239	udp-glycosyltransferase 83a1	598	9	102.735	7.41111e+13	1	F:transferase activity, transferring hexosyl groups	EC:2.4.1.0
isotig01240	rcd one 5-like protein	592	10	2.21831e-58	77.7%	5	P:response to salt stress; P:response to chitin; C:mitochondrion; F:NAD+ ADP-ribosyltransferase activity; P:reactive oxygen species metabolic process	EC:2.4.2.30
isotig01241	aconitate hydratase 1-like	602	10	4.01345e-59	95.0%	13	P:citrate metabolic process; C:vacuole; F:copper ion binding; C:plasma membrane; F:4 iron, 4 sulfur cluster binding; F:mRNA 5'-UTR binding; P:isocitrate metabolic process; C:apoplast; C:mitochondrion; P:response to salt stress; F:citrate dehydratase activity; P:glyoxylate cycle; F:isocitrate hydro-lyase (cis-aconitate-forming) activity	EC:4.2.1.3
isotig01242	pathogenesis-related thaumatin-like protein	602	10	3.29847e-45	75.4%	2	C:anchored to membrane; P:response to other organism	-
isotig01243	monodehydroascorbate reductase	601	10	1.46695e-77	94.5%	15	C:cytosol; P:response to jasmonic acid stimulus; P:oxidation-reduction process; P:response to water deprivation; P:response to salt stress; P:response to symbiotic fungus; F:monodehydroascorbate reductase (NADH) activity; F:flavin adenine dinucleotide binding; P:regulation of symbiosis, encompassing mutualism through parasitism; P:response to zinc ion; C:chloroplast; P:response to cadmium ion; C:…	EC:1.6.5.4
isotig01244	agenet domain containing protein expressed	580	9	0.00219213	8.25556e+13	1	F:RNA binding	-
isotig01245	actin 2	601	10	1.62882e-20	100.0%	3	C:cytoskeleton; C:cytoplasm; F:ATP binding	-
isotig01246	thylakoid lumen kda protein	594	10	1.78527e-80	94.4%	3	P:photosystem II repair; C:chloroplast thylakoid lumen; C:chloroplast thylakoid membrane	-
isotig01247	uncharacterized protein	600	10	2.69105e-15	63.5%	2	C:vacuole; C:plasma membrane	-
isotig01248	uncharacterized protein loc100257164	599	10	1.78839e-44	70.2%	1	C:plasma membrane
isotig01249	aspartic proteinase nepenthesin-2	592	10	2.35671e-51	77.9%	4	C:apoplast; P:proteolysis; F:DNA binding; F:aspartic-type endopeptidase activity	EC:3.4.23.0
isotig01250	elongation factor 1-	593	10	6.75263e-96	99.3%	7	F:translation elongation factor activity; F:sulfate adenylyltransferase (ATP) activity; P:translational elongation; P:GTP catabolic process; F:GTPase activity; C:cytoplasm; F:GTP binding	EC:2.7.7.4
isotig01251	gtp-binding protein	594	10	1.74242e-91	97.5%	6	C:vacuole; F:GTP binding; C:plasma membrane; F:hydrolase activity; P:small GTPase mediated signal transduction; P:protein transport	-
isotig01252	map kinase	596	10	1.12941e-90	95.3%	8	F:MAP kinase activity; P:circadian rhythm; F:protein binding; P:MAPK cascade; F:protein tyrosine kinase activity; P:protein phosphorylation; F:ATP binding; P:response to hydrogen peroxide	EC:2.7.11.24; EC:2.7.10.0
isotig01253	uncharacterized protein loc100256200	593	10	2.01372e-53	83.5%	0	-
isotig01254	b3 domain-containing protein os07g0563300-like	593	10	8.58181e-76	82.7%	5	F:DNA binding; C:nucleus; F:zinc ion binding; C:plastid; P:regulation of transcription, DNA-dependent	-
isotig01255	uncharacterized protein loc100382290	589	10	7.81313e-43	100.0%	8	C:microtubule; C:plastid; P:protein polymerization; P:GTP catabolic process; P:microtubule-based movement; F:GTPase activity; F:structural molecule activity; F:GTP binding	-
isotig01256	osmotin-like protein	593	10	9.42251e-98	88.3%	2	C:extracellular region; C:plant-type cell wall	-
isotig01257	uncharacterized protein loc100776610	593	10	7.29872e-58	79.6%	0	-
isotig01258	protein	593	10	4.49003e-07	85.4%	1	F:copper ion binding	-
isotig01259	auxin-responsive protein	587	10	2.13836e-62	83.7%	7	P:regulation of translation; P:response to light stimulus; P:regulation of transcription, DNA-dependent; C:plastid; F:protein dimerization activity; P:auxin mediated signaling pathway; C:nucleus	-
isotig01260	26s proteasome non-atpase regulatory subunit	589	10	1.5289e-69	91.9%	16	P:proteasomal ubiquitin-dependent protein catabolic process; C:cytosol; P:proteasome assembly; C:proteasome regulatory particle, base subcomplex; P:regulation of cell cycle; P:response to misfolded protein; C:plasmodesma; P:cytoskeleton organization; F:ubiquitin binding; F:enzyme regulator activity; P:regulation of protein catabolic process; P:gluconeogenesis; P:gravitropism; P:regulation of cata…	-
isotig01261	e-cadherin binding protein	589	10	5.85037e-44	65.9%	3	F:zinc ion binding; C:intracellular; P:biological_process
isotig01262	short-chain dehydrogenase tic chloroplastic-like	583	10	1.67676e-51	84.1%	6	F:protochlorophyllide reductase activity; C:chloroplast inner membrane; F:calmodulin binding; P:oxidation-reduction process; F:nucleotide binding; P:protein transport	EC:1.3.1.33
isotig01263	14-3-3-like partial	587	10	1.98756e-84	96.5%	1	F:protein domain specific binding	-
isotig01264	protein argonaute 1-like	583	10	6.29821e-91	96.5%	16	F:translation initiation factor activity; P:translational initiation; C:cytosol; P:auxin metabolic process; P:adventitious root development; F:miRNA binding; P:virus induced gene silencing; P:leaf morphogenesis; F:endoribonuclease activity; P:response to auxin stimulus; F:siRNA binding; P:response to far red light; C:nucleus; P:embryo development ending in seed dormancy; P:gene silencing by miRNA…	-
isotig01265	acetyl- c-acetyltransferase	587	10	3.74838e-83	95.6%	4	C:peroxisome; P:metabolic process; F:acetyl-CoA C-acetyltransferase activity; C:plasma membrane	EC:2.3.1.9
isotig01266	geminivirus rep-interacting motor protein	587	10	4.59272e-73	88.6%	19	F:microtubule motor activity; C:cytosol; F:microtubule binding; F:RNA binding; P:DNA repair; C:cell plate; F:endonuclease activity; P:RNA-dependent DNA replication; C:microtubule; P:chloroplast accumulation movement; F:RNA-directed DNA polymerase activity; C:chloroplast envelope; F:DNA binding; F:ATP binding; P:microtubule-based movement; P:preprophase band assembly; P:chloroplast avoidance movem…	EC:2.7.7.49
isotig01267	protein jade-1	565	10	3.99953e-53	80.1%	1	F:zinc ion binding	-
isotig01268	asparagine synthetase	584	10	3.94624e-75	95.1%	3	F:asparagine synthase (glutamine-hydrolyzing) activity; P:asparagine biosynthetic process; F:ATP binding	EC:6.3.5.4
isotig01269	---NA---	583	0			0	-
isotig01270	letm1-like protein	583	10	2.46201e-63	83.6%	2	P:regulation of meristem growth; C:chloroplast envelope	-
isotig01271	photosystem i reaction center subunit	579	10	7.60675e-41	83.7%	4	C:chloroplast thylakoid lumen; C:chloroplast photosystem I; P:photosynthesis; F:calmodulin binding	-
isotig01272	ap2 erf domain-containing transcription factor	583	10	1.63541e-22	81.5%	6	P:induced systemic resistance, jasmonic acid mediated signaling pathway; P:regulation of transcription, DNA-dependent; F:DNA binding; P:response to chitin; F:sequence-specific DNA binding transcription factor activity; C:nucleus	-
isotig01273	chaperone protein htpg family protein	587	10	6.24271e-67	96.5%	17	C:cytosol; P:response to water deprivation; C:mitochondrion; P:protein folding; P:response to salt stress; P:response to chlorate; C:chloroplast envelope; P:response to heat; C:vacuolar membrane; P:chloroplast organization; P:ovule development; F:ATP binding; C:chloroplast stroma; F:unfolded protein binding; P:de-etiolation; C:plasma membrane; P:embryo development ending in seed dormancy	-
isotig01274	ribosomal protein l13	584	10	5.01358e-72	93.3%	8	P:translation; C:ribosome; F:structural constituent of ribosome; C:chloroplast envelope; C:thylakoid; C:chloroplast stroma; P:protein targeting to chloroplast; P:embryo development ending in seed dormancy	-
isotig01275	50s ribosomal protein	584	10	1.91846e-47	94.8%	7	F:structural constituent of ribosome; F:RNA binding; C:large ribosomal subunit; C:chloroplast stroma; C:nucleus; P:translation; C:chloroplast thylakoid membrane	-
isotig01276	class ii small heat shock protein le-	582	10	4.41253e-52	93.9%	6	P:protein folding; P:response to high light intensity; F:unfolded protein binding; P:response to hydrogen peroxide; P:hyperosmotic response; P:response to heat	-
isotig01277	mitogen-activated protein kinase 16-like	580	10	1.78498e-21	80.2%	6	F:MAP kinase activity; C:vacuole; C:plasma membrane; P:MAPK cascade; P:protein phosphorylation; F:ATP binding	EC:2.7.11.24
isotig00098	dtdp-glucose 4-6-	427	10	5.60084e-58	95.3%	6	P:cellular metabolic process; F:UDP-glucuronate decarboxylase activity; F:coenzyme binding; F:nucleotide binding; C:plasma membrane; P:D-xylose metabolic process	EC:4.1.1.35
isotig00099	alanine--glyoxylate aminotransferase 2 homolog mitochondrial	505	10	9.72507e-55	88.3%	3	P:metabolic process; F:pyridoxal phosphate binding; F:alanine-glyoxylate transaminase activity	EC:2.6.1.44
isotig00100	alanine--glyoxylate aminotransferase 2 homolog mitochondrial	498	10	4.80829e-45	88.5%	3	P:metabolic process; F:pyridoxal phosphate binding; F:alanine-glyoxylate transaminase activity	EC:2.6.1.44
isotig00101	alanine--glyoxylate aminotransferase 2 homolog mitochondrial	402	10	2.47833e-39	90.2%	3	P:metabolic process; F:pyridoxal phosphate binding; F:alanine-glyoxylate transaminase activity	EC:2.6.1.44
isotig00102	alanine glyoxylate aminotransferase-like protein	395	10	5.65923e-29	90.3%	4	F:pyridoxal phosphate binding; F:alanine-glyoxylate transaminase activity; P:metabolic process; C:mitochondrion	EC:2.6.1.44
isotig00103	nadh dehydrogenase subunit 2	3265	10	0.0	96.6%	5	C:mitochondrial inner membrane; C:respiratory chain; F:NADH dehydrogenase (ubiquinone) activity; C:integral to membrane; P:ATP synthesis coupled electron transport	EC:1.6.5.3
isotig00104	nadh dehydrogenase subunit 2	1624	10	1.83664e-51	95.4%	3	F:NADH dehydrogenase (ubiquinone) activity; P:ATP synthesis coupled electron transport; C:mitochondrion	EC:1.6.5.3
isotig00105	nadh dehydrogenase subunit 2	1331	10	6.97239e-69	98.6%	5	C:mitochondrial inner membrane; C:respiratory chain; F:NADH dehydrogenase (ubiquinone) activity; C:integral to membrane; P:ATP synthesis coupled electron transport	EC:1.6.5.3
isotig00106	uncharacterized protein loc100264164	1795	10	0.0	79.9%	6	C:plant-type vacuole; C:plasma membrane; P:transmembrane transport; C:vacuolar membrane; F:calcium ion binding; C:integral to membrane	-
isotig00107	sodium calcium exchanger family protein	1715	10	0.0	82.2%	10	P:Golgi organization; C:plant-type vacuole; P:hydrogen peroxide catabolic process; C:plasmodesma; C:plasma membrane; P:transmembrane transport; C:vacuolar membrane; F:calcium ion binding; C:integral to membrane; P:vacuole organization	-
isotig01278	nucleoprotein tpr	569	10	2.15097e-48	82.3%	14	P:microtubule cytoskeleton organization; P:poly(A)+ mRNA export from nucleus; F:protein binding; P:negative regulation of flower development; C:chloroplast; P:negative regulation of protein sumoylation; C:nucleolus; C:cytosol; F:nucleic acid binding; C:nuclear pore; P:anaphase; C:plasmodesma; P:protein import into nucleus; P:stamen development	-
isotig01279	uncharacterized protein loc100252199	579	10	2.09391e-46	83.5%	4	C:intracellular; P:transport; C:plasma membrane; F:transporter activity	-
isotig01280	atp-binding cassette	580	10	1.93725e-85	96.1%	4	F:organic phosphonate transmembrane-transporting ATPase activity; P:ATP catabolic process; F:ATP binding; C:plasma membrane	EC:3.6.3.28
isotig01281	phenylalanine ammonia-lyase	565	10	1.40398e-71	93.5%	4	C:cytoplasm; F:phenylalanine ammonia-lyase activity; P:cinnamic acid biosynthetic process; P:L-phenylalanine catabolic process	EC:4.3.1.5
isotig01282	probable mitochondrial 2-oxoglutarate malate carrier	565	10	5.32915e-60	95.4%	6	F:dicarboxylic acid transmembrane transporter activity; P:dicarboxylic acid transport; P:transmembrane transport; P:mitochondrial transport; C:integral to membrane; C:mitochondrial membrane	-
isotig01283	pollen-specific protein c13	573	10	6.60321e-38	81.7%	6	P:Golgi organization; C:extracellular space; P:calcium ion transport; P:cell wall biogenesis; P:cysteine biosynthetic process; P:response to salt stress	-
isotig01284	uncharacterized protein loc100262828	572	10	2.3743e-41	76.7%	0	-
isotig01285	ymf16_arath ame: full=uncharacterized tatc-like protein ymf16 ame: full=orfx	575	10	1.7562e-69	93.6%	1	C:mitochondrion	-
isotig01286	qltg3-1	576	10	4.2302e-07	95.9%	2	P:lipid transport; C:cytoplasmic membrane-bounded vesicle	-
isotig01287	nematode resistance-like protein	570	10	9.80361e-10	57.8%	7	P:defense response; F:ADP binding; P:signal transduction; C:intracellular; F:ATP binding; F:nucleotide binding; F:nucleoside-triphosphatase activity
isotig01288	cinnamoyl- reductase	571	10	1.41494e-55	82.7%	7	F:cinnamoyl-CoA reductase activity; P:response to cadmium ion; F:dihydrokaempferol 4-reductase activity; P:lignin biosynthetic process; F:coenzyme binding; F:nucleotide binding; P:oxidation-reduction process	EC:1.2.1.44; EC:1.1.1.219
isotig01289	protein	572	10	1.37366e-42	70.9%	2	P:primary metabolic process; P:cellular macromolecule metabolic process	-
isotig01290	glyoxalase bleomycin resistance protein dioxygenase	562	10	3.95196e-53	93.9%	4	P:metabolic process; F:oxidoreductase activity, acting on single donors with incorporation of molecular oxygen, incorporation of two atoms of oxygen; F:lyase activity; C:chloroplast	EC:1.13.11.0
isotig01291	acyl carrier protein	567	10	1.39413e-17	91.9%	3	P:fatty acid biosynthetic process; C:chloroplast; F:phosphopantetheine binding	-
isotig01292	ran binding	558	10	6.33348e-58	94.0%	2	P:intracellular transport; C:intracellular	-
isotig01293	transcription factor tcp2-like	558	10	1.67834e-34	82.9%	0	-
isotig01294	adp-ribosylation factor a1e	571	10	1.84797e-55	100.0%	10	C:cytosol; P:small GTPase mediated signal transduction; C:plasmodesma; C:plastid; F:phospholipase activator activity; P:N-terminal protein myristoylation; P:intracellular protein transport; C:vacuole; C:Golgi-associated vesicle; F:GTP binding	-
isotig01295	(-)-germacrene d synthase	571	10	8.54443e-69	86.5%	5	F:germacrene-D synthase activity; C:cytoplasm; F:magnesium ion binding; P:terpenoid biosynthetic process; F:germacradienol synthase activity	EC:4.2.3.22
isotig01296	uncharacterized protein loc100306223	567	10	5.10434e-26	81.5%	4	C:photosystem II; C:integral to membrane; P:photosynthesis; C:chloroplast thylakoid membrane	-
isotig01297	protein cbby	571	10	6.55743e-61	93.5%	3	F:hydrolase activity; C:chloroplast envelope; C:chloroplast stroma	-
isotig01298	hypothetical protein MTR_5g067940 [Medicago truncatula]	569	2	0.210803	84.5%	0	-
isotig01299	60s ribosomal protein	565	10	3.15297e-76	98.4%	5	C:nucleolus; F:structural constituent of ribosome; C:plasma membrane; C:cytosolic large ribosomal subunit; P:translation	-
isotig01300	type ii peroxiredoxin	568	10	1.14471e-49	95.3%	6	P:response to cadmium ion; F:peroxiredoxin activity; F:peroxidase activity; P:oxidation-reduction process; C:chloroplast; C:plasma membrane	EC:1.11.1.15; EC:1.11.1.7
isotig01301	40s ribosomal protein s19	566	10	8.04236e-42	87.9%	7	C:nucleolus; C:vacuole; F:structural constituent of ribosome; C:cell wall; C:cytosolic small ribosomal subunit; C:membrane; P:translation	-
isotig01302	40s ribosomal protein	564	10	6.25004e-79	98.1%	5	F:structural constituent of ribosome; C:vacuolar membrane; C:cytosolic small ribosomal subunit; P:translation; F:rRNA binding	-
isotig01303	serine threonine protein phosphatase 4 regulatory subunit	563	10	5.03442e-26	74.8%	0	-
isotig01304	nuclear receptor corepressor	540	8	9.13657e-35	77.75%	2	C:nucleus; F:DNA binding	-
isotig01305	saposin b domain-containing protein	566	10	9.01507e-53	75.0%	1	P:lipid metabolic process	-
isotig01306	sigma factor sigb regulation protein rsbq	565	10	5.55263e-81	94.8%	10	P:flavonoid biosynthetic process; P:response to sucrose stimulus; F:methyl indole-3-acetate esterase activity; P:de-etiolation; P:response to UV-B; F:carboxylesterase activity; F:retinyl-palmitate esterase activity; F:methyl salicylate esterase activity; F:methyl jasmonate esterase activity; P:response to karrikin	EC:3.1.1.1; EC:3.1.1.21
isotig01307	protein	563	10	2.34401e-16	85.7%	0	-
isotig01308	cellulose synthase a catalytic subunit 6	563	10	4.7755e-93	96.9%	10	P:primary cell wall biogenesis; P:cell growth; F:zinc ion binding; C:integral to membrane; P:cellulose biosynthetic process; P:cell wall organization; F:cellulose synthase (UDP-forming) activity; P:seed coat development; P:cortical microtubule organization; C:Golgi apparatus	EC:2.4.1.12
isotig01309	granule-bound starch synthase	561	10	4.88455e-82	94.6%	2	P:glucan biosynthetic process; F:starch synthase activity	EC:2.4.1.21
isotig01310	glycerol-3-phosphate acyltransferase	560	10	1.24214e-85	96.9%	4	C:endoplasmic reticulum; P:metabolic process; F:glycerol-3-phosphate O-acyltransferase activity; C:plasma membrane	EC:2.3.1.15
isotig01311	---NA---	560	0			0	-
isotig01312	multidrug resistance protein abc transporter family	561	10	7.16922e-73	94.4%	17	P:transmembrane transport; F:folic acid transporter activity; P:stomatal movement; P:oxidation-reduction process; P:response to water deprivation; C:integral to membrane; F:ATPase activity, coupled to transmembrane movement of substances; C:plant-type vacuole; P:response to wounding; P:ATP catabolic process; C:vacuolar membrane; F:ATP binding; P:folic acid transport; F:2-alkenal reductase [NAD(P)…	EC:1.3.1.74
isotig01313	60s ribosomal protein l27	553	10	1.08911e-46	93.9%	4	F:structural constituent of ribosome; C:cytosolic large ribosomal subunit; C:membrane; P:translation	-
isotig01314	high mobility group family	558	7	0.00452155	6.82857e+13	1	C:intracellular organelle	-
isotig01315	transducin wd40 domain-containing protein	558	10	1.82998e-81	95.2%	2	C:cytosol; C:plasma membrane	-
isotig01316	wrky transcription factor 2-7	553	10	2.15567e-42	76.6%	9	P:defense response to bacterium; P:regulation of transcription, DNA-dependent; P:response to salicylic acid stimulus; P:regulation of defense response to virus by host; F:sequence-specific DNA binding; P:response to chitin; F:sequence-specific DNA binding transcription factor activity; P:defense response to fungus; C:nucleus	-
isotig01317	protein	559	10	1.68224e-26	86.9%	1	C:chloroplast thylakoid membrane	-
isotig01318	udp-glucose 6-	557	10	3.27294e-70	91.4%	8	F:NAD binding; P:D-xylose metabolic process; F:UDP-glucose 6-dehydrogenase activity; C:cell wall; P:cell wall pectin metabolic process; C:nucleus; C:cytosol; P:oxidation-reduction process	EC:1.1.1.22
isotig01319	nitrate transporter	557	10	3.06577e-28	74.4%	6	P:seed development; P:oligopeptide transport; F:low affinity nitrate transmembrane transporter activity; P:low affinity nitrate transport; P:glucosinolate biosynthetic process; C:plasma membrane	-
isotig01320	wrky transcription	556	10	3.37392e-43	83.4%	4	F:sequence-specific DNA binding transcription factor activity; F:sequence-specific DNA binding; F:calmodulin binding; P:regulation of transcription, DNA-dependent	-
isotig01321	plastid protein	552	10	4.23359e-67	94.9%	13	P:tRNA metabolic process; F:zinc ion binding; P:regulation of protein dephosphorylation; P:endonucleolytic cleavage of tetracistronic rRNA transcript (SSU-rRNA, LSU-rRNA, 4.5S-rRNA, 5S-rRNA); P:photosystem II assembly; P:chloroplast relocation; C:chloroplast; P:leaf morphogenesis; F:acid-amino acid ligase activity; P:cell differentiation; P:positive regulation of transcription, DNA-dependent; P:t…	EC:6.3.2.0
isotig01322	atp-dependent protease	557	10	1.59943e-85	98.1%	13	F:serine-type endopeptidase activity; F:ATP-dependent peptidase activity; C:nucleoid; P:growth; P:protein import into peroxisome matrix, docking; P:misfolded or incompletely synthesized protein catabolic process; P:protein processing; P:lateral root development; F:sequence-specific DNA binding; P:ATP catabolic process; C:peroxisomal matrix; F:ATP binding; P:termination of G-protein coupled recept…	EC:3.4.21.0
isotig01323	copper zinc superoxide partial	555	10	1.88636e-30	93.5%	4	F:metal ion binding; P:superoxide metabolic process; F:superoxide dismutase activity; P:oxidation-reduction process	EC:1.15.1.1
isotig01324	---NA---	555	0			0	-
isotig01325	uncharacterized protein kiaa0090 homolog	554	10	4.30341e-76	90.0%	7	C:Golgi apparatus; C:cytoplasmic membrane-bounded vesicle; C:plasma membrane; C:vacuolar membrane; P:ER to Golgi vesicle-mediated transport; C:endoplasmic reticulum; F:catalytic activity	-
isotig01326	chloroplast omega-6 fatty acid desaturase	553	10	1.04219e-81	94.6%	4	F:oxidoreductase activity; C:chloroplast membrane; P:unsaturated fatty acid biosynthetic process; P:oxidation-reduction process	-
isotig01327	sucrose synthase sus1	551	10	6.99059e-78	95.4%	3	F:sucrose synthase activity; P:biosynthetic process; P:sucrose metabolic process	EC:2.4.1.13
isotig01328	uncharacterized protein loc100305485 precursor	551	10	1.67161e-63	96.4%	10	P:protein folding; C:membrane fraction; C:multivesicular body; C:Golgi stack; P:root development; C:chloroplast; P:protein peptidyl-prolyl isomerization; C:cytosol; C:endoplasmic reticulum; F:peptidyl-prolyl cis-trans isomerase activity	EC:5.2.1.8
isotig01329	cc-nbs-lrr resistance protein	542	8	36.2633	476.25	7	P:defense response; F:ATP binding; F:ADP binding; F:nucleotide binding; F:nucleoside-triphosphatase activity; F:hydrolase activity; F:phosphoprotein phosphatase activity
isotig01330	40s ribosomal protein	548	10	3.1995e-75	94.4%	7	C:nucleolus; F:structural constituent of ribosome; C:plasma membrane; C:cell wall; C:cytosolic small ribosomal subunit; C:chloroplast; P:translation	-
isotig01331	f-box family protein	547	10	4.80671e-65	89.7%	13	P:primary root development; P:stomatal complex morphogenesis; F:inositol hexakisphosphate binding; F:auxin binding; C:vacuolar membrane; F:ubiquitin-protein ligase activity; P:cellular response to nitrate; P:stamen development; P:response to molecule of bacterial origin; P:pollen maturation; P:lateral root development; P:auxin mediated signaling pathway; C:plasma membrane	EC:6.3.2.19
isotig01332	vq motif-containing protein	548	10	2.40047e-30	67.9%	0	-
isotig01333	nucleic acid binding protein	538	10	1.22108e-50	85.5%	21	F:protein tyrosine phosphatase activity; P:multidimensional cell growth; C:fatty acid elongase complex; F:3R-hydroxyacyl-CoA dehydratase activity; C:integral to membrane; P:anthocyanin accumulation in tissues in response to UV light; P:root hair elongation; C:cytosol; P:negative regulation of developmental growth; P:negative regulation of peptidyl-tyrosine phosphorylation; P:regulation of hormone…	EC:3.1.3.48
isotig01334	lysophosphatidic acid acyltransferase	546	10	2.27974e-41	92.9%	4	C:endoplasmic reticulum membrane; P:CDP-diacylglycerol biosynthetic process; F:1-acylglycerol-3-phosphate O-acyltransferase activity; C:integral to membrane	EC:2.3.1.51
isotig01335	proline-rich family protein	545	10	1.64137e-24	91.1%	8	P:chloroplast relocation; P:leaf morphogenesis; P:carotenoid biosynthetic process; P:thylakoid membrane organization; P:cell differentiation; P:ncRNA metabolic process; C:chloroplast thylakoid membrane; P:transcription from plastid promoter	-
isotig01336	40s ribosomal protein	544	10	4.9556e-73	98.3%	4	F:structural constituent of ribosome; F:RNA binding; C:small ribosomal subunit; P:translation	-
isotig01337	---NA---	541	0			0	-
isotig01338	binding protein	540	10	4.30174e-63	93.2%	1	C:cellular_component
isotig01339	tripeptidyl-peptidase 2-like	540	10	4.13009e-42	76.8%	8	C:cytosolic ribosome; F:tripeptidyl-peptidase activity; F:serine-type endopeptidase activity; C:plasma membrane; C:vacuolar membrane; C:chloroplast; P:proteolysis; P:gravitropism	EC:3.4.21.0
isotig01340	protein transport protein sec61 subunit alpha	539	10	4.09897e-51	100.0%	3	F:P-P-bond-hydrolysis-driven protein transmembrane transporter activity; C:membrane; P:protein transport	-
isotig01341	dnaj protein homolog	539	10	2.2544e-41	86.8%	11	C:cell wall; F:heat shock protein binding; P:protein folding; C:nucleolus; P:response to salt stress; P:regulation of ATPase activity; F:metal ion binding; P:response to heat; F:ATP binding; F:unfolded protein binding; C:plasma membrane	-
isotig01342	predicted protein [Populus trichocarpa]	540	1	1529.81	52.0%	0	-
isotig01343	gata transcription factor 9-like	538	10	4.11749e-39	72.6%	2	P:regulation of transcription, DNA-dependent; F:DNA binding	-
isotig01344	3-ketoacyl- synthase	534	10	1.73851e-78	95.4%	10	P:pollen tube development; P:wax biosynthetic process; P:very long-chain fatty acid metabolic process; P:cuticle development; P:response to light stimulus; P:response to cold; F:fatty acid elongase activity; P:unidimensional cell growth; C:membrane; C:endoplasmic reticulum	-
isotig01345	morn (membrane occupation and recognition nexus) repeat-containing protein	537	10	1.177e-42	84.0%	9	P:iron-sulfur cluster assembly; C:chloroplast envelope; P:thylakoid membrane organization; P:vegetative to reproductive phase transition of meristem; P:chloroplast organization; P:ovule development; P:asymmetric cell division; C:chloroplast thylakoid membrane; P:embryo development ending in seed dormancy	-
isotig01346	60s ribosomal protein	538	10	1.40553e-59	96.0%	7	F:structural constituent of ribosome; C:plasma membrane; F:RNA binding; C:vacuolar membrane; C:cytosolic large ribosomal subunit; C:chloroplast; P:translation	-
isotig01347	60s ribosomal protein	537	10	9.01194e-43	96.9%	10	P:RNA methylation; P:translation; C:nucleolus; P:response to cold; F:structural constituent of ribosome; C:vacuolar membrane; C:chloroplast; C:cytosolic large ribosomal subunit; C:Golgi apparatus; C:plasma membrane	-
isotig01348	carotenoid cleavage dioxygenase 1	534	10	1.13508e-66	93.3%	6	P:response to water deprivation; C:vacuole; P:xanthophyll catabolic process; C:plasma membrane; F:9-cis-epoxycarotenoid dioxygenase activity; P:carotene catabolic process	EC:1.13.11.51
isotig01349	24-sterol c-methyltransferase	534	10	9.15892e-48	93.2%	13	P:multidimensional cell growth; P:brassinosteroid biosynthetic process; P:glucose catabolic process; C:cytosol; P:isopentenyl diphosphate biosynthetic process, methylerythritol 4-phosphate pathway; P:acetyl-CoA metabolic process; P:methylation; P:xylem and phloem pattern formation; P:negative regulation of DNA endoreduplication; F:24-methylenesterol C-methyltransferase activity; C:endoplasmic ret…	EC:2.1.1.143
isotig01350	light harvesting-like protein 3	535	10	2.6955e-54	93.9%	1	C:chloroplast thylakoid membrane	-
isotig01351	protein	534	10	2.38259e-27	82.9%	3	C:photosystem II; P:photosynthesis; C:chloroplast thylakoid membrane	-
isotig01352	membrane bound o-acyl transferase family protein	530	10	1.33446e-75	92.9%	11	C:integral to membrane; C:intracellular; P:response to symbiotic fungus; P:intra-Golgi vesicle-mediated transport; P:galactolipid biosynthetic process; F:lysophospholipid acyltransferase activity; P:cellular response to water deprivation; P:organ senescence; P:autophagy; P:cellular response to phosphate starvation; C:plasma membrane	-
isotig01353	aconitate hydratase	531	10	3.44278e-77	91.9%	15	F:citrate dehydratase activity; P:response to oxidative stress; F:copper ion binding; C:cell wall; C:mitochondrion; P:response to salt stress; F:isocitrate hydro-lyase (cis-aconitate-forming) activity; F:4 iron, 4 sulfur cluster binding; F:ATP binding; P:response to abscisic acid stimulus; P:isocitrate metabolic process; C:chloroplast; P:response to cadmium ion; P:citrate metabolic process; C:pla…	EC:4.2.1.3
isotig01354	plasma membrane intrinsic protein	531	10	6.22761e-57	96.4%	10	P:response to water deprivation; C:chloroplast envelope; C:vacuole; C:anchored to plasma membrane; P:water transport; P:transmembrane transport; C:integral to membrane; C:mitochondrion; P:response to salt stress; F:transporter activity	-
isotig01355	60s ribosomal protein	528	10	2.87271e-22	98.1%	3	C:ribosome; F:structural constituent of ribosome; P:translation	-
isotig01356	proteasome subunit alpha type-7	528	10	4.58635e-20	88.0%	5	C:cytoplasm; C:proteasome core complex, alpha-subunit complex; P:ubiquitin-dependent protein catabolic process; C:nucleus; F:threonine-type endopeptidase activity	EC:3.4.25.0
isotig01357	cbl-interacting serine threonine-protein	534	10	4.5963e-63	86.8%	6	F:calmodulin-dependent protein kinase activity; C:plant-type vacuole membrane; P:protein phosphorylation; F:ATP binding; P:signal transduction; P:response to salt stress	EC:2.7.11.17
isotig01358	nucleoside diphosphate kinase 1	525	10	1.58598e-57	93.9%	13	P:nucleoside diphosphate phosphorylation; F:nucleoside diphosphate kinase activity; C:peroxisome; P:response to salt stress; P:UTP biosynthetic process; F:ATP binding; P:GTP biosynthetic process; C:chloroplast; C:vacuole; P:response to cadmium ion; P:CTP biosynthetic process; C:plasma membrane; C:apoplast	EC:2.7.4.6
isotig01359	o-fucosyltransferase-like protein	528	10	5.80059e-59	84.5%	2	P:root hair cell differentiation; C:chloroplast	-
isotig01360	blue copper protein	529	10	4.98042e-23	72.6%	2	F:electron carrier activity; F:copper ion binding
isotig01361	thylakoid lumenal 19 kda chloroplast	525	10	2.6142e-60	92.2%	4	C:oxygen evolving complex; F:calcium ion binding; P:photosynthesis; C:extrinsic to membrane	-
isotig01362	predicted protein [Populus trichocarpa]	529	10	5.00358e-06	65.4%	1	P:response to oxidative stress
isotig01363	abscisic acid 8 -hydroxylase 1	522	10	3.12784e-74	95.0%	13	P:electron transport chain; F:(+)-abscisic acid 8'-hydroxylase activity; P:response to water deprivation; P:abscisic acid catabolic process; P:secretion by cell; F:electron carrier activity; F:oxygen binding; P:response to deep water; P:response to abscisic acid stimulus; F:heme binding; P:release of seed from dormancy; P:defense response to fungus; P:response to red or far red light	EC:1.14.13.93
isotig01364	calmodulin-binding transcription activator	527	10	4.53347e-60	87.0%	2	C:nucleus; F:DNA binding	-
isotig01365	acylamino-acid-releasing enzyme	528	10	1.96541e-44	78.7%	7	C:vacuole; F:serine-type endopeptidase activity; P:response to cadmium ion; C:chloroplast; P:proteolysis; F:serine-type aminopeptidase activity; C:cytosol	EC:3.4.21.0
isotig01366	---NA---	528	0			0	-
isotig01367	protein exordium like 5	527	10	9.73691e-71	93.3%	2	F:molecular_function; P:biological_process
isotig01368	thioredoxin f2	526	10	5.56756e-42	91.5%	17	C:cytosol; P:glycerol ether metabolic process; F:enzyme activator activity; P:pentose-phosphate shunt; P:cell redox homeostasis; P:isopentenyl diphosphate biosynthetic process, methylerythritol 4-phosphate pathway; P:glucosinolate metabolic process; F:electron carrier activity; F:enzyme inhibitor activity; P:negative regulation of catalytic activity; P:maltose metabolic process; P:starch biosynth…	-
isotig01369	mlp-like protein 423	517	10	2.46475e-31	83.0%	4	C:membrane; P:defense response; P:mRNA modification; P:response to biotic stimulus	-
isotig01370	60s ribosomal protein l35-like	525	10	6.82168e-32	95.6%	5	C:nucleolus; F:structural constituent of ribosome; C:plasma membrane; C:cytosolic large ribosomal subunit; P:translation	-
isotig01371	gdp-d-mannose-3 -epimerase	514	10	2.40968e-63	98.5%	4	F:GDP-mannose 3,5-epimerase activity; P:cellular metabolic process; F:nucleotide binding; F:coenzyme binding	EC:5.1.3.18
isotig01372	disease resistance protein	515	10	1.32298e-45	76.6%	4	P:innate immune response; F:ADP binding; F:ATP binding; F:nucleoside-triphosphatase activity	EC:3.6.1.15
isotig01373	stem-specific protein	522	10	3.70339e-67	90.3%	4	P:response to abscisic acid stimulus; C:cytosol; C:nucleus; C:plasma membrane	-
isotig01374	abc transporter f family member 5	517	10	1.63231e-11	62.3%	19	P:G2 phase of mitotic cell cycle; P:flower development; F:H3 histone acetyltransferase activity; F:protein binding; F:nucleoside-triphosphatase activity; P:protein deubiquitination; C:histone acetyltransferase complex; P:response to xenobiotic stimulus; P:histone methylation; P:response to nematode; P:cullin deneddylation; P:photomorphogenesis; P:root morphogenesis; P:protein ubiquitination; F:DN…	EC:3.6.1.15
isotig01375	photosystem i reaction center subunit chloroplast	519	10	9.18544e-42	86.4%	10	F:chlorophyll binding; P:photosynthetic electron transport in photosystem I; C:chloroplast envelope; P:protein stabilization; P:photosystem I stabilization; P:cellular cation homeostasis; C:chloroplast photosystem I; P:divalent metal ion transport; P:cysteine biosynthetic process; P:photosynthetic NADP+ reduction	-
isotig01376	uncharacterized protein loc100785006	518	10	2.22223e-45	86.6%	1	C:vacuole	-
isotig01377	enhancer of polycomb-like protein	512	10	7.55718e-46	70.0%	3	F:sequence-specific DNA binding transcription factor activity; C:NuA4 histone acetyltransferase complex; P:regulation of transcription, DNA-dependent	-
isotig00108	sodium calcium exchanger family protein	666	10	9.28819e-07	79.0%	10	P:Golgi organization; C:plant-type vacuole; P:hydrogen peroxide catabolic process; C:plasmodesma; C:plasma membrane; P:transmembrane transport; C:vacuolar membrane; F:calcium ion binding; C:integral to membrane; P:vacuole organization	-
isotig00109	zeaxanthin epoxidase	1609	10	0.0	92.2%	14	P:electron transport chain; P:response to water deprivation; P:response to red light; P:xanthophyll biosynthetic process; C:chloroplast envelope; F:zeaxanthin epoxidase activity; P:response to heat; F:antheraxanthin epoxidase activity; P:response to osmotic stress; P:response to abscisic acid stimulus; P:cellular aromatic compound metabolic process; P:abscisic acid biosynthetic process; F:zeaxant…	EC:1.14.13.90
isotig00110	zeaxanthin epoxidase	1245	10	1.72754e-141	91.2%	14	P:electron transport chain; P:response to water deprivation; P:response to red light; P:xanthophyll biosynthetic process; C:chloroplast envelope; F:zeaxanthin epoxidase activity; P:response to heat; F:antheraxanthin epoxidase activity; P:response to osmotic stress; P:response to abscisic acid stimulus; P:cellular aromatic compound metabolic process; P:abscisic acid biosynthetic process; F:zeaxant…	EC:1.14.13.90
isotig00111	zeaxanthin epoxidase	615	10	2.95297e-74	94.8%	10	F:zeaxanthin epoxidase activity; P:xanthophyll biosynthetic process; P:cellular aromatic compound metabolic process; P:abscisic acid biosynthetic process; P:response to abscisic acid stimulus; F:zeaxanthin epoxidase [overall] activity; F:antheraxanthin epoxidase activity; C:chloroplast; C:membrane; P:electron transport chain	EC:1.14.13.90
isotig00112	xyloglucan endotransglucosylase hydrolase protein 9	949	10	6.11711e-140	92.8%	5	F:hydrolase activity, hydrolyzing O-glycosyl compounds; P:cellular glucan metabolic process; C:apoplast; C:cell wall; F:xyloglucan:xyloglucosyl transferase activity	EC:3.2.1.0; EC:2.4.1.207
isotig00113	xyloglucan endotransglucosylase hydrolase protein 9	934	10	2.26459e-139	92.8%	5	F:hydrolase activity, hydrolyzing O-glycosyl compounds; P:cellular glucan metabolic process; C:apoplast; C:cell wall; F:xyloglucan:xyloglucosyl transferase activity	EC:3.2.1.0; EC:2.4.1.207
isotig00114	xyloglucan endotransglycosylase 2	585	10	2.55543e-24	89.0%	5	F:hydrolase activity, hydrolyzing O-glycosyl compounds; P:cellular glucan metabolic process; C:apoplast; C:cell wall; F:xyloglucan:xyloglucosyl transferase activity	EC:3.2.1.0; EC:2.4.1.207
isotig00115	calcium-dependent protein kinase	666	10	8.79228e-101	97.2%	9	C:cytosol; P:protein phosphorylation; F:protein serine/threonine kinase activity; F:calcium ion binding; P:regulation of anion channel activity; P:regulation of stomatal movement; F:ATP binding; P:abscisic acid mediated signaling pathway; C:plasma membrane	EC:2.7.11.0
isotig00116	calcium-dependent protein kinase	576	10	3.20161e-47	98.0%	9	C:cytosol; P:protein phosphorylation; F:protein serine/threonine kinase activity; F:calcium ion binding; P:regulation of anion channel activity; P:regulation of stomatal movement; F:ATP binding; P:abscisic acid mediated signaling pathway; C:plasma membrane	EC:2.7.11.0
isotig00117	calcium dependent protein kinase 6	373	10	7.40812e-10	94.7%	9	C:cytosol; P:protein phosphorylation; F:protein serine/threonine kinase activity; F:calcium ion binding; P:regulation of anion channel activity; P:regulation of stomatal movement; F:ATP binding; P:abscisic acid mediated signaling pathway; C:plasma membrane	EC:2.7.11.0
isotig01378	beige-related and wd-40 repeat-containing protein	513	10	5.19042e-50	90.4%	1	F:nucleotide binding	-
isotig01379	programmed cell death 6-interacting	515	10	8.05063e-27	98.0%	2	C:plasmodesma; C:cytosol	-
isotig01380	calmodulin-binding transcription activator	518	10	4.68077e-06	84.7%	2	C:nucleus; F:DNA binding	-
isotig01381	gtp-binding nuclear protein ran-3-like	505	10	7.08002e-73	98.8%	7	P:small GTPase mediated signal transduction; P:nucleocytoplasmic transport; P:GTP catabolic process; F:GTPase activity; P:intracellular protein transport; F:GTP binding; C:nucleus	-
isotig01382	dihydrolipoamide dehydrogenase precursor	517	10	9.11955e-63	94.5%	13	F:copper ion binding; P:oxidation-reduction process; F:zinc ion binding; C:mitochondrial respiratory chain complex I; F:cobalt ion binding; P:response to light stimulus; P:cell redox homeostasis; F:ATP binding; F:flavin adenine dinucleotide binding; F:dihydrolipoyl dehydrogenase activity; C:chloroplast; P:response to cadmium ion; C:apoplast	EC:1.8.1.4
isotig01383	glutathione-dependent formaldehyde dehydrogenase	514	10	9.39358e-76	97.0%	16	P:indoleacetic acid biosynthetic process; C:cytosol; F:S-nitrosoglutathione reductase activity; P:seed development; P:regulation of transport; F:zinc ion binding; P:ethanol oxidation; C:peroxisome; P:cell death; F:S-(hydroxymethyl)glutathione dehydrogenase activity; P:heat acclimation; P:isopentenyl diphosphate biosynthetic process, methylerythritol 4-phosphate pathway; P:formaldehyde metabolic p…	EC:1.1.1.284; EC:1.1.1.1
isotig01384	probable serine threonine-protein kinase at1g54610-like	514	10	1.31541e-75	96.2%	7	F:RNA polymerase II carboxy-terminal domain kinase activity; F:DNA binding; C:plasma membrane; F:protein dimerization activity; P:protein phosphorylation; F:ATP binding; P:cell division	EC:2.7.11.23
isotig01385	protein rer1a	509	10	5.12017e-52	91.5%	7	P:membrane fusion; P:intra-Golgi vesicle-mediated transport; C:Golgi apparatus; P:retrograde vesicle-mediated transport, Golgi to ER; C:integral to membrane; C:cis-Golgi network; C:endoplasmic reticulum	-
isotig01386	serine threonine-protein phosphatase bsl1-like	515	10	2.55812e-73	94.2%	7	F:manganese ion binding; F:phosphoprotein phosphatase activity; C:plasma membrane; F:iron ion binding; C:nucleus; P:regulation of protein localization; P:brassinosteroid mediated signaling pathway	EC:3.1.3.16
isotig01387	polyubiquitin 3	513	10	2.5805e-57	99.5%	7	P:protein targeting to vacuole; C:vacuole; P:response to UV-B; P:cellular protein modification process; P:ubiquitin-dependent protein catabolic process; P:vesicle-mediated transport; C:nucleus	-
isotig01388	magnesium transporter nipa2	505	10	8.99789e-52	93.6%	3	F:molecular_function; P:biological_process; C:cellular_component
isotig01389	uncharacterized protein	508	10	5.48313e-44	88.0%	5	C:integral to membrane; C:vacuole; F:oxidoreductase activity, acting on the CH-CH group of donors; C:plasma membrane; P:lipid metabolic process	-
isotig01390	protein	511	10	7.56052e-33	97.0%	11	P:aerobic respiration; F:AMP transmembrane transporter activity; P:AMP transport; P:ADP transport; F:ATP transmembrane transporter activity; C:plasma membrane; C:integral to membrane; F:ADP transmembrane transporter activity; C:plastid; C:mitochondrion; P:ATP transport	-
isotig01391	translation elongation factor	512	10	8.24362e-80	98.8%	27	P:pentose-phosphate shunt; C:chloroplast envelope; C:apoplast; P:regulation of protein dephosphorylation; P:positive regulation of catalytic activity; P:embryo development ending in seed dormancy; P:starch biosynthetic process; P:photosystem II assembly; F:translation elongation factor activity; P:chloroplast relocation; P:maltose metabolic process; P:translational elongation; F:GTP binding; P:GT…	-
isotig01392	nadph cytochrome p450 reductase	511	10	2.83987e-72	93.3%	6	C:endoplasmic reticulum membrane; P:phenylpropanoid metabolic process; F:NADPH-hemoprotein reductase activity; F:iron ion binding; F:FMN binding; P:oxidation-reduction process	EC:1.6.2.4
isotig01393	triose phosphate phosphate chloroplast	487	10	2.02509e-26	97.1%	4	C:chloroplast membrane; C:integral to membrane; P:transport; F:transporter activity	-
isotig01394	phd finger family protein	507	10	7.51445e-46	89.5%	7	F:DNA binding; F:hydrolase activity; F:methylated histone residue binding; F:ATP binding; C:nucleus; F:zinc ion binding; P:regulation of transcription, DNA-dependent	-
isotig01395	protein-s-isoprenylcysteine o-methyltransferase	507	10	3.4506e-61	88.8%	3	P:C-terminal protein methylation; F:protein C-terminal S-isoprenylcysteine carboxyl O-methyltransferase activity; C:integral to membrane	EC:2.1.1.100
isotig01396	protein binding	504	10	1.00411e-19	66.0%	11	P:cytokinesis by cell plate formation; P:anaphase; P:meristem initiation; P:leaf morphogenesis; P:meristem maintenance; P:microtubule cytoskeleton organization; P:cell wall macromolecule metabolic process; P:xylem development; P:regulation of cell proliferation; P:determination of bilateral symmetry; C:plasma membrane	-
isotig01397	transport inhibitor response 1	507	10	2.89395e-61	86.9%	9	C:SCF ubiquitin ligase complex; F:inositol hexakisphosphate binding; F:auxin binding; P:lateral root formation; P:stamen development; P:response to molecule of bacterial origin; P:pollen maturation; P:auxin mediated signaling pathway; P:cellular response to phosphate starvation	-
isotig01398	receptor-like protein kinase	507	10	9.35501e-43	88.3%	22	P:reciprocal meiotic recombination; F:non-membrane spanning protein tyrosine kinase activity; P:xylan biosynthetic process; P:pollen tube reception; P:meiotic chromosome segregation; P:regulation of chromosome organization; P:post-embryonic development; P:meiotic DNA double-strand break formation; P:defense response to fungus; C:chloroplast; P:regulation of unidimensional cell growth; P:protein a…	EC:2.7.10.2; EC:2.7.11.0
isotig01399	protein	505	10	8.12215e-08	87.5%	1	F:copper ion binding	-
isotig01400	thioredoxin h	502	10	1.42346e-34	88.6%	9	F:enzyme activator activity; F:oxidoreductase activity, acting on a sulfur group of donors, disulfide as acceptor; F:electron carrier activity; P:cell redox homeostasis; P:glycerol ether metabolic process; P:positive regulation of catalytic activity; C:cytosol; F:protein disulfide oxidoreductase activity; P:electron transport chain	EC:1.8.4.0
isotig01401	cyclin-t1-5-like isoform 1	504	8	0.423825	723.75	4	P:regulation of primary metabolic process; P:regulation of cellular metabolic process; P:cellular macromolecule metabolic process; P:regulation of macromolecule metabolic process	-
isotig01402	phospholipid:diacylglycerol acyltransferase 1	504	10	6.61135e-79	94.7%	5	C:vacuole; F:phospholipid:diacylglycerol acyltransferase activity; C:endoplasmic reticulum; F:phosphatidylcholine-sterol O-acyltransferase activity; P:lipid metabolic process	EC:2.3.1.158; EC:2.3.1.43
isotig01403	udp-glycosyltransferase-like protein	502	10	2.52985e-54	80.9%	2	F:anthocyanidin 3-O-glucosyltransferase activity; P:metabolic process	EC:2.4.1.115
isotig01404	early nodulin 55-2	501	10	6.35833e-34	80.4%	2	F:copper ion binding; F:electron carrier activity	-
isotig01405	26s protease regulatory	500	10	2.55169e-75	100.0%	17	P:proteasomal ubiquitin-dependent protein catabolic process; F:peptidase activity; P:proteasome assembly; C:proteasome regulatory particle, base subcomplex; P:response to misfolded protein; P:meristem structural organization; P:leaf morphogenesis; P:response to heat; F:ATP binding; F:microtubule-severing ATPase activity; P:root cap development; P:meristem growth; P:response to cadmium ion; C:cyto…	EC:3.6.4.3
isotig01406	protein cobra	498	10	1.79416e-73	93.0%	30	P:response to fructose stimulus; P:water transport; P:cellulose microfibril organization; C:anchored to plasma membrane; P:cellulose metabolic process; C:plant-type cell wall; P:multidimensional cell growth; P:calcium ion transport; P:response to salt stress; P:pattern specification process; F:electron carrier activity; P:anthocyanin accumulation in tissues in response to UV light; P:root hair el…	EC:1.10.2.2
isotig01407	uncharacterized protein	490	10	3.8477e-43	70.6%	3	C:nucleus; F:protein binding; C:cytosol	-
isotig01408	protein	496	10	8.33419e-71	99.8%	11	F:copper ion binding; P:small GTPase mediated signal transduction; C:plastid; C:vacuolar membrane; P:protein ADP-ribosylation; P:intracellular protein transport; P:response to cadmium ion; F:hydrolase activity; C:Golgi-associated vesicle; F:GTP binding; C:plasma membrane	-
isotig01409	ubiquinol-cytochrome c reductase subunit 7	499	10	2.50034e-30	94.1%	7	F:ubiquinol-cytochrome-c reductase activity; C:mitochondrial respiratory chain complex III; C:plastid; C:vacuolar membrane; P:mitochondrial electron transport, ubiquinol to cytochrome c; C:plasma membrane; F:electron transporter, transferring electrons within CoQH2-cytochrome c reductase complex activity	EC:1.10.2.2
isotig01410	e3 ubiquitin-protein ligase ubr3-like	499	10	2.21052e-47	90.2%	9	P:wax biosynthetic process; P:regulation of seed germination; P:ubiquitin-dependent protein catabolic process; F:zinc ion binding; P:regulation of lipid catabolic process; P:cuticle hydrocarbon biosynthetic process; F:ubiquitin-protein ligase activity; P:protein ubiquitination; P:response to abscisic acid stimulus	EC:6.3.2.19
isotig01411	agenet domain containing protein expressed	494	10	5.54947e-29	72.4%	1	F:RNA binding	-
isotig01412	survival motor neuron	499	10	2.54452e-19	85.8%	4	F:RNA binding; C:cytoplasm; P:mRNA processing; C:nucleus	-
isotig01413	sec14 cytosolic factor	500	10	7.70076e-64	91.1%	4	C:intracellular; P:transport; C:plasma membrane; F:transporter activity	-
isotig01414	dihydrolipoamide acetyltransferase	497	10	5.41461e-62	91.4%	7	C:chloroplast envelope; C:pyruvate dehydrogenase complex; P:pyruvate metabolic process; F:copper ion binding; P:response to cadmium ion; F:dihydrolipoyllysine-residue acetyltransferase activity; C:mitochondrion	EC:2.3.1.12
isotig01415	glutathione peroxidase	497	10	1.57176e-69	96.8%	7	C:chloroplast envelope; P:response to oxidative stress; C:chloroplast stroma; F:glutathione peroxidase activity; C:chloroplast thylakoid membrane; P:oxidation-reduction process; P:response to karrikin	EC:1.11.1.9
isotig01416	skp1-like protein 1b isoform 2	480	10	9.99338e-31	91.4%	3	C:cytoplasm; C:nucleolus; P:ubiquitin-dependent protein catabolic process	-
isotig01417	biotin carboxyl carrier protein of acetyl- carboxylase	495	10	1.96647e-29	75.6%	1	C:chloroplast
isotig01418	hypersensitive-induced response protein	492	10	3.24425e-35	97.5%	3	C:vacuole; C:chloroplast; C:plasma membrane	-
isotig01419	asr4 protein	495	10	706.559	54.3%	1	P:response to stress
isotig01420	serine-threonine protein plant-	489	10	4.77554e-60	93.6%	2	F:kinase activity; P:phosphorylation	-
isotig01421	uncharacterized protein	485	10	3.58915e-23	87.7%	0	-
isotig01422	yth domain-containing	490	10	3.15859e-59	85.8%	3	F:RNA binding; P:pseudouridine synthesis; F:pseudouridine synthase activity	EC:5.4.99.12
isotig01423	40s ribosomal protein	479	10	6.71874e-19	85.0%	5	F:structural constituent of ribosome; C:cytosolic small ribosomal subunit; C:chloroplast; C:membrane; P:translation	-
isotig01424	soul heme-binding protein	492	10	3.65604e-15	83.8%	3	C:chloroplast envelope; P:carotenoid biosynthetic process; C:chloroplast thylakoid membrane	-
isotig01425	rab gtpase-8c	492	10	1.13974e-29	93.1%	9	P:methionine biosynthetic process; P:small GTPase mediated signal transduction; F:protein binding; P:RNA splicing, via endonucleolytic cleavage and ligation; C:vacuole; P:protein transport; F:GTP binding; C:plasma membrane; P:ethylene mediated signaling pathway	-
isotig01426	receptor-like serine threonine-protein kinase ale2-like	491	10	2.11375e-63	92.6%	4	F:receptor activity; P:protein phosphorylation; F:ATP binding; F:protein serine/threonine kinase activity	EC:2.7.11.0
isotig01427	mago nashi	487	10	4.48015e-50	98.8%	6	C:nucleolus; C:exon-exon junction complex; P:pollen tube guidance; P:embryo development ending in seed dormancy; C:nuclear speck; C:chloroplast	-
isotig01428	serine threonine protein	477	10	1.5543e-44	79.5%	14	P:stomatal movement; P:phosphorelay signal transduction system; P:protein phosphorylation; P:blue light signaling pathway; P:phototropism; P:regulation of transcription, DNA-dependent; P:signal transduction by phosphorylation; F:ATP binding; F:protein kinase C activity; P:negative regulation of anion channel activity by blue light; F:blue light photoreceptor activity; F:phosphorelay sensor kinase…	EC:2.7.11.13
isotig01429	dna binding	484	10	5.70365e-37	83.4%	2	C:plasma membrane; C:chloroplast	-
isotig01430	galacturonosyltransferase 8-like	475	10	1.47215e-50	93.2%	4	F:polygalacturonate 4-alpha-galacturonosyltransferase activity; C:Golgi apparatus; P:homogalacturonan biosynthetic process; C:mitochondrion	EC:2.4.1.43
isotig01431	predicted protein [Populus trichocarpa]	486	1	3382.79	92.0%	5	F:microtubule binding; C:cortical microtubule, transverse to long axis; C:plasma membrane; P:xylem and phloem pattern formation; P:plant-type cell wall biogenesis	-
isotig01432	kinesin-like protein kif2a	479	10	2.0136e-31	89.7%	7	F:microtubule motor activity; C:microtubule; P:trichome morphogenesis; C:Golgi stack; F:ATP binding; P:microtubule-based movement; C:plasma membrane	-
isotig01433	structural maintenance of chromosomes protein 3-like	484	10	2.92252e-41	78.7%	3	P:sister chromatid cohesion; F:ATP binding; C:chromosome	-
isotig01434	protein disulfide isomerase family	484	10	1.7843e-64	93.7%	11	C:plant-type cell wall; C:vacuole; P:response to endoplasmic reticulum stress; C:cytoplasmic membrane-bounded vesicle; C:plasma membrane; F:electron carrier activity; P:cell redox homeostasis; P:glycerol ether metabolic process; F:protein disulfide isomerase activity; F:protein disulfide oxidoreductase activity; C:endoplasmic reticulum	EC:5.3.4.1
isotig01435	glutamyl-trna reductase	482	10	1.17043e-18	74.9%	14	P:defense response by callose deposition; P:heme biosynthetic process; F:glutamyl-tRNA reductase activity; P:oxidation-reduction process; P:response to reactive oxygen species; P:response to light stimulus; P:response to iron ion; P:response to wounding; P:chlorophyll biosynthetic process; P:response to chitin; P:iron ion homeostasis; F:protein binding; F:NADP binding; C:chloroplast	EC:1.2.1.70
isotig01436	cyclic nucleotide gated channel 9	481	10	2.2991e-32	80.2%	7	P:DNA mediated transformation; F:cyclic nucleotide binding; F:voltage-gated potassium channel activity; P:transmembrane transport; P:potassium ion transport; C:integral to membrane; F:calmodulin binding	-
isotig01437	protein-l-isoaspartate o-	480	10	1.54941e-50	91.5%	9	C:cytoplasm; F:protein-L-isoaspartate (D-aspartate) O-methyltransferase activity; P:cellular protein modification process; P:aging; P:response to abscisic acid stimulus; P:methylation; C:nucleus; P:seed germination; P:response to salt stress	EC:2.1.1.77
isotig01438	60s ribosomal protein	476	10	1.10873e-58	97.9%	5	C:nucleolus; F:structural constituent of ribosome; C:plasma membrane; C:cytosolic large ribosomal subunit; P:translation	-
isotig01439	40s ribosomal protein s20	468	10	3.34955e-41	97.8%	10	P:RNA methylation; P:translation; C:cell wall; F:RNA binding; C:nucleolus; C:plasmodesma; F:structural constituent of ribosome; C:cytosolic small ribosomal subunit; C:membrane; C:Golgi apparatus	-
isotig01440	transforming growth factor-beta receptor-associated protein 1-like	481	10	3.52151e-60	84.1%	4	C:cytosol; P:vesicle-mediated transport; F:small GTPase regulator activity; P:intracellular protein transport	-
isotig01441	hyoscyamine 6-	480	10	3.79748e-30	71.6%	2	F:oxidoreductase activity, acting on paired donors, with incorporation or reduction of molecular oxygen, 2-oxoglutarate as one donor, and incorporation of one atom each of oxygen into both donors; P:metabolic process	EC:1.14.11.0
isotig01442	callose synthase	472	10	3.04954e-61	95.9%	15	P:microtubule cytoskeleton organization; P:methylation-dependent chromatin silencing; P:chromatin silencing by small RNA; P:cell-cell signaling; P:cytokinesis by cell plate formation; P:histone H3-K9 methylation; P:membrane fusion; P:microsporogenesis; P:(1->3)-beta-D-glucan biosynthetic process; P:production of miRNAs involved in gene silencing by miRNA; P:production of ta-siRNAs involved in RNA…	EC:2.4.1.34
isotig01443	iron ion binding oxidoreductase oxidoreductase protein	477	10	7.42844e-19	62.3%	6	P:oxidation-reduction process; F:oxidoreductase activity, acting on paired donors, with incorporation or reduction of molecular oxygen, 2-oxoglutarate as one donor, and incorporation of one atom each of oxygen into both donors; F:oxidoreductase activity; F:iron ion binding; P:secondary metabolic process; C:cellular_component
isotig01444	t-complex protein 1 subunit beta	474	10	9.56488e-47	91.2%	12	C:cytosol; C:cell wall; P:proteasomal protein catabolic process; P:protein folding; P:rRNA processing; P:cytoskeleton organization; P:cell wall modification; F:ATP binding; C:anchored to plasma membrane; P:gluconeogenesis; F:unfolded protein binding; P:plant-type cell wall organization	-
isotig01445	lipid transfer protein	477	10	3.72531e-22	81.7%	2	F:lipid binding; P:lipid transport	-
isotig01446	cinnamyl alcohol dehydrogenase-like protein	474	10	6.61079e-40	90.9%	9	P:plant-type hypersensitive response; F:cinnamyl-alcohol dehydrogenase activity; P:response to bacterium; F:aryl-alcohol dehydrogenase (NAD+) activity; P:lignin biosynthetic process; F:zinc ion binding; F:nucleotide binding; P:oxidation-reduction process; F:mannitol dehydrogenase activity	EC:1.1.1.195; EC:1.1.1.90; EC:1.1.1.255
isotig01447	squamosa promoter-binding	464	10	1.84112e-47	80.5%	2	C:nucleus; F:DNA binding	-
isotig01448	zinc finger ccch domain-containing protein 53-like	467	10	1.97282e-25	64.6%	2	F:nucleic acid binding; F:metal ion binding	-
isotig01449	tho complex subunit 2	471	10	2.98869e-53	86.3%	4	C:membrane; P:signal transduction by phosphorylation; F:phosphorelay sensor kinase activity; P:phosphorelay signal transduction system	-
isotig01450	eukaryotic translation initiation factor 1a-like	463	10	2.02226e-47	98.4%	2	P:translational initiation; F:translation initiation factor activity	-
isotig01451	probable xyloglucan glycosyltransferase 12-like	470	10	7.15112e-56	97.5%	2	F:cellulose synthase (UDP-forming) activity; C:membrane	EC:2.4.1.12
isotig01452	40s ribosomal protein s15a	451	10	3.71143e-55	99.9%	12	P:RNA methylation; P:translation; C:cell wall; C:mitochondrion; C:plasmodesma; F:structural constituent of ribosome; C:cytosolic small ribosomal subunit; P:cell wall modification; C:vacuolar membrane; P:plant-type cell wall organization; C:Golgi apparatus; C:plasma membrane	-
isotig01453	---NA---	465	0			0	-
isotig01454	fkbp12-rapamycin complex-associated protein	467	10	3.12057e-55	96.0%	32	P:negative regulation of autophagy; P:positive regulation of cell growth; P:embryonic pattern specification; F:1-phosphatidylinositol-3-kinase activity; P:reciprocal meiotic recombination; P:seed maturation; P:cell adhesion; P:cytokinesis by cell plate formation; P:actin nucleation; P:meiotic chromosome segregation; P:regulation of chromosome organization; F:protein self-association; P:toxin cata…	EC:2.7.1.137
isotig01455	protein	466	10	7.04933e-07	86.2%	3	C:ribosome; F:structural constituent of ribosome; P:translational elongation	-
isotig01456	---NA---	466	0			0	-
isotig01457	uncharacterized protein loc100244242	464	4	1337.93	91.0%	2	C:membrane; C:chloroplast envelope	-
isotig01458	pre-mrna-processing-splicing factor	462	10	1.61522e-72	99.6%	25	P:gravitropism; P:N-terminal protein myristoylation; P:microtubule cytoskeleton organization; P:methylation-dependent chromatin silencing; P:galactolipid biosynthetic process; P:cell-cell signaling; C:membrane; P:seed maturation; P:cytokinesis by cell plate formation; C:plant-type cell wall; P:sucrose biosynthetic process; P:vegetative phase change; C:chloroplast; P:determination of bilateral sym…	EC:2.4.1.13
isotig01459	atp binding	464	9	4.58774e-06	83.0%	2	P:regulation of meristem growth; C:vacuole	-
isotig01460	cc-nbs-lrr resistance protein	462	10	1.64547e-08	55.9%	5	P:defense response; F:ATP binding; F:ADP binding; F:nucleotide binding; F:nucleoside-triphosphatase activity
isotig01461	vacuolar sorting receptor 1	461	10	2.37606e-07	90.4%	6	F:amino-terminal vacuolar sorting propeptide binding; F:receptor activity; P:Golgi to vacuole transport; C:plasma membrane; F:calcium ion binding; C:Golgi transport complex	-
isotig01462	rna-binding protein	461	10	5.41455e-44	92.4%	2	C:cytosol; F:RNA binding	-
isotig01463	stromal cell-derived factor 2-like protein	464	10	4.57265e-61	94.1%	6	P:defense response to bacterium; F:dolichyl-phosphate-mannose-protein mannosyltransferase activity; P:defense response to fungus; P:pathogen-associated molecular pattern dependent induction by symbiont of host innate immune response; C:membrane; C:endoplasmic reticulum	EC:2.4.1.109
isotig01464	beta-ketoacyl-coa synthase family protein	461	10	8.37285e-37	90.9%	5	F:transferase activity, transferring acyl groups other than amino-acyl groups; P:fatty acid biosynthetic process; P:response to cold; C:membrane; P:response to light stimulus	EC:2.3.1.0
isotig01465	steroid binding protein	462	10	2.11631e-27	89.5%	4	F:heme binding; C:cytosol; F:2-alkenal reductase [NAD(P)] activity; P:oxidation-reduction process	EC:1.3.1.74
isotig01466	serine threonine protein kinase ctr1	463	10	1.14787e-65	95.1%	4	F:non-membrane spanning protein tyrosine kinase activity; P:protein phosphorylation; F:ATP binding; F:protein serine/threonine kinase activity	EC:2.7.10.2; EC:2.7.11.0
isotig01467	ethylene response 3	462	10	6.58821e-58	88.6%	10	F:phosphorelay response regulator activity; P:intracellular signal transduction; F:ethylene binding; P:peptidyl-histidine phosphorylation; P:regulation of transcription, DNA-dependent; P:signal transduction by phosphorylation; F:ATP binding; F:phosphorelay sensor kinase activity; C:endoplasmic reticulum membrane; P:ethylene mediated signaling pathway	-
isotig01468	lysm domain-containing gpi-anchored protein 1	450	2	12.6324	68.0%	3	C:anchored to plasma membrane; P:cell wall macromolecule catabolic process; C:plasma membrane
isotig01469	cytochrome c oxidase subunit via	454	10	2.4281e-23	88.4%	2	C:mitochondrial respiratory chain complex IV; F:cytochrome-c oxidase activity	EC:1.9.3.1
isotig01470	zinc finger	452	10	7.0811e-14	66.9%	4	F:binding; P:response to stimulus; C:plasmodesma; P:protein glycosylation	-
isotig01471	high mobility group family	449	10	7.50927e-22	79.4%	1	C:nucleus	-
isotig01472	high mobility group family	449	10	8.37563e-36	86.6%	0	-
isotig01473	-diacylglycerol 3-beta-	445	10	2.3728e-35	87.6%	7	F:1,2-diacylglycerol 3-beta-galactosyltransferase activity; P:thylakoid membrane organization; P:galactolipid biosynthetic process; C:chloroplast inner membrane; F:carbohydrate binding; P:lipid glycosylation; P:embryo development	EC:2.4.1.46
isotig01474	---NA---	442	0			0	-
isotig01475	alpha-l-fucosidase 2-like	443	10	2.9055e-41	81.0%	2	P:metabolic process; F:1,2-alpha-L-fucosidase activity	EC:3.2.1.63
isotig01476	psi reaction center subunit iii	440	10	5.19998e-11	96.9%	4	C:plastoglobule; C:photosystem I reaction center; P:photosynthesis; C:chloroplast thylakoid membrane	-
isotig01477	uncharacterized protein loc100250601	438	10	6.36728e-17	79.0%	7	F:sequence-specific DNA binding transcription factor activity; F:sequence-specific DNA binding; F:RNA-directed DNA polymerase activity; P:RNA-dependent DNA replication; F:RNA binding; C:nucleus; P:regulation of transcription, DNA-dependent	EC:2.7.7.49
isotig00118	photosystem ii protein partial	2335	10	0.00268219	93.0%	4	C:photosystem II reaction center; C:integral to membrane; P:photosynthesis; C:chloroplast thylakoid membrane	-
isotig00119	potassium transporter 8-like	840	10	9.43439e-37	96.8%	3	F:potassium ion transmembrane transporter activity; P:potassium ion transmembrane transport; C:plasma membrane	-
isotig00120	potassium transporter 8-like	626	10	2.26352e-65	75.1%	3	F:potassium ion transmembrane transporter activity; P:potassium ion transmembrane transport; C:plasma membrane	-
isotig00121	magnesium chelatase h subunit	4105	10	0.0	95.7%	6	F:cobaltochelatase activity; F:magnesium chelatase activity; P:chlorophyll biosynthetic process; C:chloroplast; C:mitochondrion; F:nucleotide binding	EC:6.6.1.2; EC:6.6.1.1
isotig00122	magnesium chelatase h subunit	4105	10	0.0	95.8%	6	F:cobaltochelatase activity; F:magnesium chelatase activity; P:chlorophyll biosynthetic process; C:chloroplast; C:mitochondrion; F:nucleotide binding	EC:6.6.1.2; EC:6.6.1.1
isotig00123	nadh dehydrogenase subunit 4	3040	10	2.63989e-148	98.6%	5	C:respiratory chain; F:NADH dehydrogenase (ubiquinone) activity; C:integral to membrane; P:ATP synthesis coupled electron transport; C:mitochondrial membrane	EC:1.6.5.3
isotig00124	nadh dehydrogenase subunit 4	1614	10	0.0	98.4%	5	C:respiratory chain; F:NADH dehydrogenase (ubiquinone) activity; C:integral to membrane; P:ATP synthesis coupled electron transport; C:mitochondrial membrane	EC:1.6.5.3
isotig00125	myo-inositol-1-phosphate synthase	1931	10	0.0	96.4%	13	P:myo-inositol hexakisphosphate biosynthetic process; P:defense response to bacterium; P:inositol biosynthetic process; F:inositol-3-phosphate synthase activity; P:response to heat; P:post-embryonic development; F:nucleotide binding; C:cytoplasm; P:response to high light intensity; P:defense response to fungus; P:response to hydrogen peroxide; P:defense response to virus; P:phosphatidylserine bio…	EC:5.5.1.4
isotig00126	myo-inositol-1-phosphate synthase	1931	10	0.0	97.1%	13	P:myo-inositol hexakisphosphate biosynthetic process; P:defense response to bacterium; P:inositol biosynthetic process; F:inositol-3-phosphate synthase activity; P:response to heat; P:post-embryonic development; F:nucleotide binding; C:cytoplasm; P:response to high light intensity; P:defense response to fungus; P:response to hydrogen peroxide; P:defense response to virus; P:phosphatidylserine bio…	EC:5.5.1.4
isotig00127	adenosylhomocysteinase s-adenosyl-l-homocysteine hydrolase	1636	10	0.0	97.2%	8	F:copper ion binding; F:adenosylhomocysteinase activity; P:one-carbon metabolic process; P:posttranscriptional gene silencing; P:methylation-dependent chromatin silencing; C:vacuole; P:response to stress; C:plasma membrane	EC:3.3.1.1
isotig01478	leucine-rich repeat receptor protein kinase exs-like	410	10	0.00864017	68.8%	5	F:oxidoreductase activity; P:phosphorylation; F:protein kinase activity; C:membrane; F:nucleotide binding	-
isotig01479	protein tify 6b-like	433	10	3.51285e-28	67.5%	0	-
isotig01480	transcription factor, putative [Ricinus communis]	432	1	60.1124	54.0%	7	P:regulation of transcription, DNA-dependent; P:response to hormone stimulus; P:transcription, DNA-dependent; P:auxin mediated signaling pathway; F:protein dimerization activity; C:nucleus; F:DNA binding
isotig01481	---NA---	427	0			0	-
isotig01482	blue copper protein	425	10	1.21979e-20	74.1%	2	F:electron carrier activity; F:copper ion binding
isotig01483	cellulose synthase catalytic subunit	421	10	8.99167e-64	98.9%	5	F:cellulose synthase (UDP-forming) activity; P:cellulose biosynthetic process; C:integral to membrane; P:cell wall organization; F:zinc ion binding	EC:2.4.1.12
isotig01484	protein	424	10	2.60592e-63	99.5%	3	F:ATP binding; F:ubiquitin-protein ligase activity; P:protein ubiquitination	EC:6.3.2.19
isotig01485	uncharacterized protein loc100267439	420	10	3.14098e-08	66.9%	0	-
isotig01486	histone h3	404	10	3.5376e-13	100.0%	4	C:nucleosome; F:DNA binding; P:nucleosome assembly; C:nucleus	-
isotig01487	protein	409	10	1.37614e-32	95.9%	4	C:nucleus; P:protein sumoylation; F:protein tag; P:response to heat	-
isotig01488	uncharacterized protein	413	10	5.49312e-35	72.7%	1	C:plasma membrane	-
isotig01489	tbc1 domain family member	413	10	1.63515e-13	59.9%	4	P:regulation of Rab GTPase activity; P:positive regulation of Rab GTPase activity; C:intracellular; F:Rab GTPase activator activity
isotig01490	40s ribosomal protein	409	10	1.05302e-19	94.4%	3	F:structural constituent of ribosome; C:cytosolic small ribosomal subunit; P:translation	-
isotig01491	polyubiquitin 2	408	10	1.08785e-37	97.6%	7	P:embryo development; P:ethylene biosynthetic process; P:protein neddylation; C:plasma membrane; P:response to auxin stimulus; C:nucleus; C:cytosol	-
isotig01492	---NA---	405	0			0	-
isotig01493	gdp-mannose -epimerase 1	400	10	2.21473e-55	100.0%	4	F:GDP-mannose 3,5-epimerase activity; P:cellular metabolic process; F:nucleotide binding; F:coenzyme binding	EC:5.1.3.18
isotig01494	---NA---	393	0			0	-
isotig01495	---NA---	395	0			0	-
isotig01496	uncharacterized protein	389	10	1.89874e-37	90.4%	5	C:cytosol; F:protein binding; C:plasma membrane; P:chloroplast accumulation movement; P:chloroplast avoidance movement	-
isotig01497	root hair defective 3 gtp-binding protein rhd3	385	10	5.25713e-29	89.4%	24	C:vacuolar membrane; P:nucleotide transport; P:cellulose metabolic process; P:membrane fusion; P:regulation of plant-type hypersensitive response; P:basic amino acid transport; F:GTP binding; P:protein targeting to membrane; C:integral to membrane; P:negative regulation of programmed cell death; F:hydrolase activity, acting on acid anhydrides; P:amino acid import; P:actin cytoskeleton organizatio…	-
isotig01498	ubiquitin carboxyl-terminal hydrolase 23-like	374	10	2.15044e-17	67.8%	2	F:peptidase activity; P:proteolysis	-
isotig01499	embryo defective 2016 protein	372	10	6.27917e-23	84.7%	1	P:embryo development ending in seed dormancy	-
isotig01500	photosystem ii 5 kda chloroplast	372	10	6.68484e-20	77.1%	6	P:response to wounding; P:response to UV-B; C:photosystem II; P:response to ozone; P:photosynthesis; C:chloroplast thylakoid membrane	-
isotig01501	tmv resistance protein n-like	362	10	2.81171	66.9%	4	P:defense response; P:signal transduction; C:intracellular; F:DNA binding
isotig01502	pentatricopeptide repeat-containing protein	361	10	2.48558e-29	78.3%	2	C:nucleus; C:chloroplast	-
isotig01503	---NA---	358	0			0	-
isotig01504	uncharacterized protein loc100783844	353	8	26.1825	72.75%	0	-
isotig01505	leucine-rich repeat receptor-like serine threonine-protein kinase at2g14440-like	349	10	6.18249e-41	92.1%	4	F:kinase activity; P:signal transduction; F:receptor activity; P:phosphorylation	-
isotig01506	zinc finger	354	10	3.48103e-13	74.0%	2	F:metal ion binding; P:response to stimulus	-
isotig01507	multidrug resistance protein abc transporter family	328	10	7.03435e-40	99.9%	0	-
isotig01508	galactose kinase	327	10	2.26813e-30	87.7%	6	C:cytoplasm; P:carbohydrate phosphorylation; F:ATP binding; P:galactose metabolic process; F:galactokinase activity; F:N-acetylgalactosamine kinase activity	EC:2.7.1.6; EC:2.7.1.157
isotig01509	receptor-like protein kinase theseus 1-like	321	10	4.30335e-26	87.6%	8	P:protein autophosphorylation; P:regulation of unidimensional cell growth; F:protein serine/threonine kinase activity; C:plasmodesma; F:ATP binding; P:post-embryonic development; P:brassinosteroid mediated signaling pathway; C:plasma membrane	EC:2.7.11.0
isotig01510	uncharacterized protein loc100818518	297	1	3304.22	60.0%	0	-
isotig01511	uncharacterized protein	288	10	1.16733e-31	89.7%	4	C:vacuole; C:plant-type cell wall; P:metabolic process; F:catalytic activity	-
isotig01512	calnexin precursor	279	10	0.0745539	96.6%	10	C:microsome; C:plant-type cell wall; P:protein folding; C:vacuole; C:plasma membrane; F:calcium ion binding; F:unfolded protein binding; C:chloroplast; C:endoplasmic reticulum; C:mitochondrion	-
isotig01513	probable disease resistance protein at5g66900-like	258	10	3.65282e-09	79.6%	4	F:nucleoside-triphosphatase activity; P:defense response; F:ADP binding; F:ATP binding	EC:3.6.1.15
isotig01514	mate efflux domain-containing protein	243	10	1.79032e-19	94.3%	5	P:drug transmembrane transport; C:membrane; F:antiporter activity; P:fruit ripening; F:drug transmembrane transporter activity	-
isotig01515	cell wall-associated hydrolase	229	9	2.27134e-22	9.63333e+13	5	F:ribulose-bisphosphate carboxylase activity; F:hydrolase activity; C:chloroplast; F:magnesium ion binding; P:carbon fixation	EC:4.1.1.39
isotig01516	gtp pyrophosphokinase-like	223	7	841.855	7.45714e+13	5	F:GTP diphosphokinase activity; P:response to wounding; F:hydrolase activity; C:chloroplast; P:guanosine tetraphosphate metabolic process	EC:2.7.6.5
isotig01517	cell wall-associated partial	215	4	0.407612	84.25%	1	C:chloroplast	-
isotig01518	cell wall-associated hydrolase	214	4	5.85866e-15	93.75%	1	F:hydrolase activity	-
isotig00128	adenosylhomocysteinase s-adenosyl-l-homocysteine hydrolase	1636	10	0.0	97.0%	7	F:copper ion binding; F:adenosylhomocysteinase activity; P:one-carbon metabolic process; P:posttranscriptional gene silencing; P:methylation-dependent chromatin silencing; C:vacuole; C:plasma membrane	EC:3.3.1.1
isotig00129	actin	1543	10	0.0	99.0%	12	C:cell wall; P:root hair elongation; P:seed germination; C:cytoskeleton; C:mitochondrion; C:nucleolus; P:response to light stimulus; P:response to wounding; P:cell division; P:response to auxin stimulus; F:ATP binding; C:plasma membrane	-
isotig00130	actin	1543	10	0.0	99.4%	12	C:cell wall; P:root hair elongation; P:seed germination; C:cytoskeleton; C:mitochondrion; C:nucleolus; P:response to light stimulus; P:response to wounding; P:cell division; P:response to auxin stimulus; F:ATP binding; C:plasma membrane	-
isotig00131	plastidic aldolase	1501	10	0.0	95.9%	10	C:plastoglobule; C:chloroplast envelope; C:cytosolic ribosome; P:response to cadmium ion; C:thylakoid lumen; P:response to abscisic acid stimulus; P:glycolysis; F:fructose-bisphosphate aldolase activity; C:membrane; C:apoplast	EC:4.1.2.13
isotig00132	plastidic aldolase	1501	10	0.0	95.3%	10	C:plastoglobule; C:chloroplast envelope; C:cytosolic ribosome; P:response to cadmium ion; C:thylakoid lumen; P:response to abscisic acid stimulus; P:glycolysis; F:fructose-bisphosphate aldolase activity; C:membrane; C:apoplast	EC:4.1.2.13
isotig00133	transcription factor lhy	1436	10	8.14885e-111	75.4%	1	F:DNA binding
isotig00134	transcription factor lhy	1412	10	1.45469e-104	77.4%	1	F:DNA binding	-
isotig00135	transcription factor une10-like	1370	10	3.76847e-108	67.8%	3	C:plasmodesma; P:double fertilization forming a zygote and endosperm; P:regulation of transcription, DNA-dependent	-
isotig00136	transcription factor une10-like	1358	10	2.16535e-105	64.3%	2	C:plasmodesma; P:double fertilization forming a zygote and endosperm	-
isotig00137	constans-like protein	1212	10	1.05468e-126	86.3%	4	P:red light signaling pathway; P:regulation of photomorphogenesis; C:nucleus; F:zinc ion binding	-
isotig00138	constans-like protein	1212	10	4.38293e-125	85.3%	4	P:red light signaling pathway; P:regulation of photomorphogenesis; C:nucleus; F:zinc ion binding	-
isotig00139	r2r3-myb transcription factor	1192	10	1.77582e-103	80.5%	12	P:response to water deprivation; P:response to jasmonic acid stimulus; P:response to gibberellin stimulus; P:lateral root development; F:DNA binding; P:response to cadmium ion; P:response to chitin; P:response to salicylic acid stimulus; P:response to auxin stimulus; P:response to abscisic acid stimulus; P:response to ethylene stimulus; P:response to salt stress	-
isotig00140	r2r3-myb transcription	1188	10	1.61282e-106	75.9%	2	P:response to hormone stimulus; F:DNA binding	-
isotig00141	cc-nbs-lrr resistance protein	1151	10	1.05056e-76	66.3%	2	P:defense response; F:ADP binding
isotig00142	cc-nbs-lrr resistance protein	1156	10	6.23974e-74	65.0%	2	P:defense response; F:ADP binding
isotig00143	pol protein	1164	10	1.38521e-131	78.2%	5	F:metal ion binding; F:RNA-directed DNA polymerase activity; P:RNA-dependent DNA replication; F:RNA binding; P:DNA integration	EC:2.7.7.49
isotig00144	pol protein	1099	10	4.03062e-125	74.7%	4	P:DNA metabolic process; F:metal ion binding; F:nucleic acid binding; F:catalytic activity	-
isotig00145	uncharacterized protein	1048	10	1.11268e-84	68.4%	3	F:molecular_function; P:biological_process; C:cellular_component
isotig00146	uncharacterized protein	1047	10	9.15064e-53	65.6%	3	F:molecular_function; P:biological_process; C:cellular_component
isotig00147	agglutinin alpha chain	1033	10	4.94718e-25	82.9%	1	P:chlorophyll catabolic process	-
isotig00148	agglutinin alpha chain	962	10	3.41998e-25	83.4%	1	P:chlorophyll catabolic process	-
isotig00149	chlorophyll a-b binding protein chloroplastic-like	994	10	7.27115e-116	92.1%	9	C:chloroplast stromal thylakoid; C:plastoglobule; P:photosynthesis, light harvesting; P:response to blue light; P:nonphotochemical quenching; C:PSII associated light-harvesting complex II; P:response to far red light; P:response to red light; C:photosystem II antenna complex	-
isotig00150	chlorophyll a-b binding protein chloroplastic-like	991	10	3.36134e-112	91.8%	9	C:chloroplast stromal thylakoid; C:plastoglobule; P:photosynthesis, light harvesting; P:response to blue light; P:nonphotochemical quenching; C:PSII associated light-harvesting complex II; P:response to far red light; P:response to red light; C:photosystem II antenna complex	-
isotig00151	2-cys peroxiredoxin	966	10	1.51092e-101	95.1%	10	P:defense response to bacterium; C:chloroplast envelope; P:response to cold; C:stromule; F:peroxidase activity; F:peroxiredoxin activity; C:chloroplast stroma; C:thylakoid; C:apoplast; P:oxidation-reduction process	EC:1.11.1.7; EC:1.11.1.15
isotig00152	2-cys peroxiredoxin	966	10	1.27907e-100	94.6%	10	P:defense response to bacterium; C:chloroplast envelope; P:response to cold; C:stromule; F:peroxidase activity; F:peroxiredoxin activity; C:chloroplast stroma; C:thylakoid; C:apoplast; P:oxidation-reduction process	EC:1.11.1.7; EC:1.11.1.15
isotig00153	photosystem ii protein	950	10	5.08601e-86	86.3%	3	P:response to karrikin; C:chloroplast thylakoid membrane; P:nonphotochemical quenching	-
isotig00154	photosystem ii protein	950	10	8.67543e-86	85.7%	3	P:response to karrikin; C:chloroplast thylakoid membrane; P:nonphotochemical quenching	-
isotig00155	tpr domain protein	959	10	3.07073e-33	84.4%	2	C:intracellular; P:RNA processing	-
isotig00156	tpr domain protein	852	10	6.63959e-10	79.2%	2	C:intracellular; P:RNA processing	-
isotig00157	eukaryotic translation initiation factor 3	830	10	1.04254e-73	72.0%	7	P:mRNA modification; F:RNA binding; P:phosphatidylglycerol biosynthetic process; P:stomatal complex morphogenesis; P:cellular macromolecule biosynthetic process; P:isopentenyl diphosphate biosynthetic process, methylerythritol 4-phosphate pathway; P:response to abscisic acid stimulus	-
isotig00158	protein kiaa0664 homolog	815	10	1.16692e-69	71.7%	7	P:mRNA modification; F:RNA binding; P:phosphatidylglycerol biosynthetic process; P:stomatal complex morphogenesis; P:cellular macromolecule biosynthetic process; P:isopentenyl diphosphate biosynthetic process, methylerythritol 4-phosphate pathway; P:response to abscisic acid stimulus	-
isotig00159	dnaj homolog subfamily c member 13-like	620	10	1.75847e-59	88.5%	19	F:heat shock protein binding; P:positive gravitropism; P:response to starvation; P:protein targeting to vacuole; P:protein folding; P:amyloplast organization; P:cell division; C:vacuolar membrane; C:late endosome; C:microsome; P:negative gravitropism; C:trans-Golgi network; P:vacuole organization; P:endocytosis; P:endosome organization; C:endoplasmic reticulum; C:Golgi apparatus; C:plasma membran…	-
isotig00160	dnaj homolog subfamily c member 13-like	608	10	5.70464e-57	87.3%	19	F:heat shock protein binding; P:positive gravitropism; P:response to starvation; P:protein targeting to vacuole; P:protein folding; P:amyloplast organization; P:cell division; C:vacuolar membrane; C:late endosome; C:microsome; P:negative gravitropism; C:trans-Golgi network; P:vacuole organization; P:endocytosis; P:endosome organization; C:endoplasmic reticulum; C:Golgi apparatus; C:plasma membran…	-
isotig00161	protein oberon 4-like	551	10	8.39289e-23	65.3%	4	P:embryonic pattern specification; P:embryonic meristem initiation; F:protein binding; P:cell fate specification	-
isotig00162	protein oberon 4-like	539	10	8.0182e-39	71.3%	4	P:embryonic pattern specification; P:embryonic meristem initiation; F:protein binding; P:cell fate specification	-
isotig00163	nuclear pore membrane glycoprotein 210-like	541	10	8.3021e-20	72.6%	4	P:embryo development ending in seed dormancy; C:cytoplasmic membrane-bounded vesicle; F:protein binding; C:nuclear envelope	-
isotig00164	nuclear pore membrane glycoprotein 210-like	480	10	1.31429e-06	78.7%	6	F:nucleic acid binding; P:embryo development ending in seed dormancy; C:cytoplasmic membrane-bounded vesicle; F:protein binding; C:nuclear envelope; F:nucleotide binding	-
isotig00165	cytochrome c	443	10	7.94923e-23	83.1%	7	F:cytochrome-c oxidase activity; F:zinc ion binding; C:mitochondrial respiratory chain complex IV; F:cobalt ion binding; P:aerobic respiration; C:chloroplast thylakoid membrane; P:mitochondrial electron transport, cytochrome c to oxygen	EC:1.9.3.1
isotig00166	cytochrome c oxidase subunit vb	442	10	7.94923e-23	82.4%	7	F:cytochrome-c oxidase activity; F:zinc ion binding; C:mitochondrial respiratory chain complex IV; F:cobalt ion binding; P:aerobic respiration; C:chloroplast thylakoid membrane; P:mitochondrial electron transport, cytochrome c to oxygen	EC:1.9.3.1
isotig00167	receptor-like protein kinase feronia-like	447	10	1.75971e-30	72.5%	3	F:protein kinase activity; P:protein phosphorylation; F:nucleotide binding	-
isotig00168	receptor-like protein kinase feronia-like	444	10	1.0358e-30	71.4%	2	F:protein kinase activity; P:phosphorylation	-
isotig00169	---NA---	435	0			0	-
isotig00170	lon protease homolog peroxisomal-like	269	10	1.16304e-10	96.8%	10	C:peroxisome; C:mitochondrion; P:growth; F:ATP-dependent peptidase activity; C:organelle lumen; P:proteolysis; F:ATP binding; P:protein import into peroxisome matrix, docking; P:lateral root development; F:serine-type endopeptidase activity	EC:3.4.21.0
isotig00171	probable leucine-rich repeat receptor-like protein kinase at4g00330-like	440	3	1.85376	7.16667e+13	1	F:protein kinase activity	-
isotig00172	photosystem i p700 apoprotein a2	9135	10	0.0	99.0%	11	F:oxidoreductase activity; F:electron carrier activity; F:magnesium ion binding; P:protein-chromophore linkage; F:chlorophyll binding; F:4 iron, 4 sulfur cluster binding; C:integral to membrane; C:photosystem I; P:photosynthesis; C:chloroplast thylakoid membrane; P:electron transport chain	-
isotig00173	photosystem i p700 apoprotein a2	8336	10	0.0	99.0%	11	F:oxidoreductase activity; F:electron carrier activity; F:magnesium ion binding; P:protein-chromophore linkage; F:chlorophyll binding; F:4 iron, 4 sulfur cluster binding; C:integral to membrane; C:photosystem I; P:photosynthesis; C:chloroplast thylakoid membrane; P:electron transport chain	-
isotig00174	rna polymerase alpha subunit	4504	10	1.27558e-146	93.5%	5	F:DNA-directed RNA polymerase activity; P:transcription, DNA-dependent; F:DNA binding; F:protein dimerization activity; C:chloroplast	EC:2.7.7.6
isotig00175	rna polymerase alpha subunit	3820	10	1.07424e-146	93.5%	5	F:DNA-directed RNA polymerase activity; P:transcription, DNA-dependent; F:DNA binding; F:protein dimerization activity; C:chloroplast	EC:2.7.7.6
isotig00176	clp protease proteolytic subunit	3100	10	1.80576e-34	94.9%	4	F:serine-type endopeptidase activity; F:ATP binding; C:chloroplast; P:proteolysis	EC:3.4.21.0
isotig00177	atp-dependent clp protease proteolytic subunit	2464	10	7.08795e-71	93.2%	4	F:serine-type endopeptidase activity; F:ATP binding; C:chloroplast; P:proteolysis	EC:3.4.21.0
contig00059	zinc finger	683	10	1.59448e-84	93.7%	2	P:lipid metabolic process; F:hydrolase activity, acting on ester bonds	-
contig00083	metallocarboxypeptidase inhibitor	564	9	1.05694e-47	8.61111e+13	3	F:nucleic acid binding; F:nucleotide binding; C:chloroplast	-
contig00127	---NA---	868	0			0	-
contig00137	m030_arath ame: full=uncharacterized mitochondrial protein g00030 ame: full=orf107a	2671	10	1.19626e-95	93.0%	1	C:mitochondrion	-
contig00143	duf246 domain-containing protein	567	5	4.49241e-06	55.4%	0	-
contig00145	ribosomal protein s10	1176	10	1.5293e-66	84.9%	1	C:chloroplast	-
contig00149	tho complex subunit	838	10	6.37002e-44	76.5%	2	F:nucleic acid binding; F:nucleotide binding	-
contig00170	atp synthase subunit beta	554	9	1.19196e-17	9.12222e+13	0	-
contig00171	rrna intron-encoded homing endonuclease	521	10	9.3075e-31	95.0%	1	F:endonuclease activity	-
contig00174	rrna intron-encoded homing endonuclease	1076	10	9.25285e-50	89.8%	1	F:endonuclease activity	-
isotig00178	atp-dependent clp	2942	10	0.0	94.5%	20	P:hydrogen peroxide catabolic process; F:ATP-dependent peptidase activity; C:Tic complex; P:chloroplast relocation; C:cell wall; C:cytosol; P:nucleotide-excision repair; P:PSII associated light-harvesting complex II catabolic process; C:chloroplast stroma; P:ncRNA metabolic process; F:DNA binding; F:nuclease activity; P:proteolysis; P:transcription from plastid promoter; C:chloroplast thylakoid m…	-
isotig00179	atp-dependent clp	2319	10	0.0	98.2%	11	C:cell wall; C:mitochondrion; C:chloroplast envelope; F:ATP-dependent peptidase activity; P:proteolysis; P:chloroplast organization; F:ATP binding; C:chloroplast thylakoid membrane; C:chloroplast stroma; P:regulation of chlorophyll biosynthetic process; P:protein import into chloroplast stroma	-
isotig00180	pyrophosphate-energized vacuolar membrane proton	2654	10	0.0	98.1%	18	P:oxidation-reduction process; P:response to water deprivation; C:mitochondrion; P:response to salt stress; P:auxin polar transport; P:tyrosine biosynthetic process; C:chloroplast envelope; F:prephenate dehydrogenase (NADP+) activity; C:plant-type vacuole membrane; F:prephenate dehydrogenase activity; F:inorganic diphosphatase activity; F:nucleotide binding; P:leaf development; F:2-alkenal reduct…	EC:1.3.1.13; EC:1.3.1.12; EC:3.6.1.1; EC:1.3.1.74
isotig00181	pyrophosphate-energized vacuolar membrane proton	2396	10	0.0	98.1%	18	P:oxidation-reduction process; P:response to water deprivation; C:mitochondrion; P:response to salt stress; P:auxin polar transport; P:tyrosine biosynthetic process; C:chloroplast envelope; F:prephenate dehydrogenase (NADP+) activity; C:plant-type vacuole membrane; F:prephenate dehydrogenase activity; F:inorganic diphosphatase activity; F:nucleotide binding; P:leaf development; F:2-alkenal reduct…	EC:1.3.1.13; EC:1.3.1.12; EC:3.6.1.1; EC:1.3.1.74
isotig00182	heat shock	2122	10	0.0	96.2%	16	P:response to virus; C:cell wall; P:oxidation-reduction process; C:nucleolus; P:response to cold; C:chloroplast envelope; P:response to heat; P:response to bacterium; F:ATP binding; F:2-alkenal reductase [NAD(P)] activity; C:vacuole; P:response to cadmium ion; C:cytosolic ribosome; P:response to karrikin; C:plasma membrane; C:apoplast	EC:1.3.1.74
isotig00183	heat shock protein 70	2128	10	0.0	97.8%	16	P:response to virus; C:cell wall; P:oxidation-reduction process; C:nucleolus; P:response to cold; C:chloroplast envelope; P:response to heat; P:response to bacterium; F:ATP binding; F:2-alkenal reductase [NAD(P)] activity; C:vacuole; P:response to cadmium ion; C:cytosolic ribosome; P:response to karrikin; C:plasma membrane; C:apoplast	EC:1.3.1.74
isotig00184	nadh dehydrogenase subunit 1	2213	10	6.1346e-47	98.9%	5	P:mitochondrial electron transport, NADH to ubiquinone; C:cytoplasmic membrane-bounded vesicle; F:NADH dehydrogenase (ubiquinone) activity; C:mitochondrial respiratory chain complex I; C:integral to membrane	EC:1.6.5.3
isotig00185	nadh dehydrogenase subunit 1	1237	10	2.63085e-159	99.4%	5	P:mitochondrial electron transport, NADH to ubiquinone; C:cytoplasmic membrane-bounded vesicle; F:NADH dehydrogenase (ubiquinone) activity; C:mitochondrial respiratory chain complex I; C:integral to membrane	EC:1.6.5.3
isotig00186	heat shock protein 70	1715	10	7.19115e-133	89.9%	9	P:protein folding; P:response to cadmium ion; C:plasmodesma; C:plasma membrane; C:cell wall; F:ATP binding; C:nucleus; C:cytosol; P:response to heat	-
isotig00187	heat shock protein 70	1644	10	4.65649e-142	91.6%	9	P:protein folding; P:response to cadmium ion; C:plasmodesma; C:plasma membrane; C:cell wall; F:ATP binding; C:nucleus; C:cytosol; P:response to heat	-
isotig00188	ribosomal protein l2	2612	10	2.43992e-77	90.7%	8	F:structural constituent of ribosome; C:small ribosomal subunit; C:large ribosomal subunit; F:transferase activity; C:chloroplast; P:translation; F:rRNA binding; F:nucleotide binding	-
isotig00189	ribosomal protein l2	760	10	2.81223e-91	97.5%	7	F:structural constituent of ribosome; C:large ribosomal subunit; F:transferase activity; C:chloroplast; P:translation; F:rRNA binding; C:mitochondrion	-
isotig00190	protein	1692	10	0.0	79.4%	2	C:plasma membrane; C:chloroplast	-
isotig00191	protein	1665	10	0.0	79.4%	2	C:plasma membrane; C:chloroplast	-
isotig00192	frigida-like protein	1768	10	0.0	85.5%	5	C:intracellular; P:protein import into peroxisome matrix; P:nuclear-transcribed mRNA catabolic process; P:fatty acid beta-oxidation; F:protein binding	-
isotig00193	frigida-like protein	1534	10	0.0	85.5%	5	C:intracellular; P:protein import into peroxisome matrix; P:nuclear-transcribed mRNA catabolic process; P:fatty acid beta-oxidation; F:protein binding	-
isotig00194	gdp-l-galactose phosphorylase	1618	10	5.88234e-140	78.9%	14	F:glucose-1-phosphate guanylyltransferase (GDP) activity; P:response to jasmonic acid stimulus; P:response to ozone; F:GDP-galactose:mannose-1-phosphate guanylyltransferase activity; F:galactose-1-phosphate guanylyltransferase (GDP) activity; P:defense response to bacterium; F:GDP-D-glucose phosphorylase activity; P:response to heat; F:mannose-1-phosphate guanylyltransferase (GDP) activity; P:def…	EC:2.7.7.22
isotig00195	protein	1587	10	5.28968e-141	79.1%	14	F:glucose-1-phosphate guanylyltransferase (GDP) activity; P:response to jasmonic acid stimulus; P:response to ozone; F:GDP-galactose:mannose-1-phosphate guanylyltransferase activity; F:galactose-1-phosphate guanylyltransferase (GDP) activity; P:defense response to bacterium; F:GDP-D-glucose phosphorylase activity; P:response to heat; F:mannose-1-phosphate guanylyltransferase (GDP) activity; P:def…	EC:2.7.7.22
isotig00196	elongation factor 1-	1707	10	0.0	99.4%	7	F:nucleotidyltransferase activity; F:translation elongation factor activity; P:translational elongation; P:GTP catabolic process; F:GTPase activity; C:cytoplasm; F:GTP binding	EC:2.7.7.0
isotig00197	elongation factor 1-	1478	10	0.0	99.4%	7	F:nucleotidyltransferase activity; F:translation elongation factor activity; P:translational elongation; P:GTP catabolic process; F:GTPase activity; C:cytoplasm; F:GTP binding	EC:2.7.7.0
isotig00198	sulfite reductase	1574	10	0.0	82.8%	17	C:chloroplast nucleoid; F:copper ion binding; P:sulfide oxidation, using siroheme sulfite reductase; P:response to salt stress; P:plastid DNA packaging; P:response to cold; C:chloroplast envelope; F:sulfite reductase (ferredoxin) activity; F:DNA binding; F:4 iron, 4 sulfur cluster binding; F:sulfite reductase activity; F:heme binding; P:negative regulation of transcription, DNA-dependent; P:regul…	EC:1.8.7.1; EC:1.8.99.1
isotig00199	sulfite reductase	1448	10	0.0	91.5%	17	C:chloroplast nucleoid; F:copper ion binding; P:sulfide oxidation, using siroheme sulfite reductase; P:response to salt stress; P:plastid DNA packaging; P:response to cold; C:chloroplast envelope; F:sulfite reductase (ferredoxin) activity; F:DNA binding; F:4 iron, 4 sulfur cluster binding; F:sulfite reductase activity; F:heme binding; P:negative regulation of transcription, DNA-dependent; P:regul…	EC:1.8.7.1; EC:1.8.99.1
isotig00200	glyceraldehyde-3-phosphate dehydrogenase	1404	10	0.0	94.4%	5	F:NAD binding; P:glucose metabolic process; P:oxidation-reduction process; F:glyceraldehyde-3-phosphate dehydrogenase (NADP+) (phosphorylating) activity; F:NADP binding	EC:1.2.1.13
isotig00201	glyceraldehyde-3-phosphate dehydrogenase	1409	10	0.0	94.6%	13	C:chloroplast envelope; P:response to sucrose stimulus; P:response to cold; F:NAD binding; F:NADP binding; C:stromule; P:glucose metabolic process; C:chloroplast stroma; C:apoplast; P:response to light stimulus; C:chloroplast thylakoid membrane; P:oxidation-reduction process; F:glyceraldehyde-3-phosphate dehydrogenase (NADP+) (phosphorylating) activity	EC:1.2.1.13
isotig00202	s-adenosylmethionine synthetase	1407	10	0.0	97.8%	7	P:response to salt stress; F:methionine adenosyltransferase activity; F:metal ion binding; P:S-adenosylmethionine biosynthetic process; P:one-carbon metabolic process; F:ATP binding; C:cytoplasm	EC:2.5.1.6
isotig00203	s-adenosylmethionine synthetase	1359	10	0.0	97.7%	7	P:response to salt stress; F:methionine adenosyltransferase activity; F:metal ion binding; P:S-adenosylmethionine biosynthetic process; P:one-carbon metabolic process; F:ATP binding; C:cytoplasm	EC:2.5.1.6
isotig00204	cationic peroxidase	1448	10	2.71192e-146	96.3%	4	F:heme binding; F:peroxidase activity; P:oxidation-reduction process; P:response to oxidative stress	EC:1.11.1.7
isotig00205	cationic peroxidase	1277	10	4.32842e-145	95.5%	4	F:heme binding; F:peroxidase activity; P:oxidation-reduction process; P:response to oxidative stress	EC:1.11.1.7
isotig00206	glyceraldehyde-3-phosphate dehydrogenase	1366	10	5.0382e-155	96.4%	29	C:vacuolar membrane; P:cytoskeleton organization; P:pentose-phosphate shunt; P:gluconeogenesis; C:apoplast; P:response to sucrose stimulus; P:response to hydrogen peroxide; F:NAD binding; P:water transport; F:NADP binding; P:response to salt stress; P:proteasomal protein catabolic process; C:chloroplast; C:Golgi apparatus; P:hyperosmotic response; C:cytosol; P:Golgi organization; F:glyceraldehyde…	EC:1.2.1.12; EC:1.2.1.9
isotig00207	glyceraldehyde-3-phosphate dehydrogenase c subunit	1139	10	3.9385e-155	96.8%	29	C:vacuolar membrane; P:cytoskeleton organization; P:pentose-phosphate shunt; P:gluconeogenesis; C:apoplast; P:response to sucrose stimulus; P:response to hydrogen peroxide; F:NAD binding; P:water transport; F:NADP binding; P:response to salt stress; P:proteasomal protein catabolic process; C:chloroplast; C:Golgi apparatus; P:hyperosmotic response; C:cytosol; P:Golgi organization; F:glyceraldehyde…	EC:1.2.1.12; EC:1.2.1.9
isotig00208	chloroplast carbonic anhydrase	1183	10	1.11279e-107	89.7%	14	C:cytosol; F:carbonate dehydratase activity; F:zinc ion binding; P:defense response to bacterium; P:response to cold; C:chloroplast envelope; P:regulation of stomatal movement; P:response to carbon dioxide; C:chloroplast thylakoid membrane; C:chloroplast stroma; P:defense response to fungus, incompatible interaction; P:carbon utilization; C:stromule; C:apoplast	EC:4.2.1.1
isotig00209	chloroplast carbonic anhydrase	1120	10	2.27565e-123	85.8%	14	C:cytosol; F:carbonate dehydratase activity; F:zinc ion binding; P:defense response to bacterium; P:response to cold; C:chloroplast envelope; P:regulation of stomatal movement; P:response to carbon dioxide; C:chloroplast thylakoid membrane; C:chloroplast stroma; P:defense response to fungus, incompatible interaction; P:carbon utilization; C:stromule; C:apoplast	EC:4.2.1.1
isotig00210	curved dna-binding	1174	10	6.94316e-82	70.4%	2	P:protein folding; F:protein binding	-
isotig00211	curved dna-binding	1112	10	4.43315e-115	76.9%	4	P:protein folding; F:unfolded protein binding; F:DNA binding; F:heat shock protein binding	-
isotig00212	atp-citrate synthase	1227	10	7.50226e-131	95.5%	16	P:carotenoid biosynthetic process; P:starch biosynthetic process; F:ATP citrate synthase activity; P:positive regulation of flower development; P:aging; P:anthocyanin accumulation in tissues in response to UV light; P:chlorophyll biosynthetic process; C:cytosol; P:positive regulation of cell size; P:regulation of embryonic development; C:citrate lyase complex; F:lyase activity; P:leaf development…	EC:2.3.3.8; EC:6.2.1.5
isotig00213	atp-citrate synthase	1033	10	5.88791e-131	95.5%	16	P:carotenoid biosynthetic process; P:starch biosynthetic process; F:ATP citrate synthase activity; P:positive regulation of flower development; P:aging; P:anthocyanin accumulation in tissues in response to UV light; P:chlorophyll biosynthetic process; C:cytosol; P:positive regulation of cell size; P:regulation of embryonic development; C:citrate lyase complex; F:lyase activity; P:leaf development…	EC:2.3.3.8; EC:6.2.1.5
isotig00214	mitochondrial-processing peptidase subunit alpha-like	1163	10	1.07452e-22	58.8%	2	C:mitochondrial envelope; C:membrane	-
isotig00215	mitochondrial-processing peptidase subunit alpha-like	1037	10	2.05991e-36	74.8%	5	C:mitochondrial inner membrane; F:metal ion binding; C:plastid; C:membrane-enclosed lumen; F:hydrolase activity	-
isotig00216	plasma membrane intrinsic protein 2-2	1112	10	4.66615e-137	93.1%	4	P:transmembrane transport; C:integral to membrane; P:water transport; F:transporter activity	-
isotig00217	plasma membrane intrinsic protein 2-2	1070	10	3.07367e-138	92.9%	4	P:transmembrane transport; C:integral to membrane; P:water transport; F:transporter activity	-
isotig00218	mip pip subfamily	1099	10	5.79327e-140	94.3%	10	P:response to water deprivation; C:chloroplast envelope; C:vacuole; C:anchored to plasma membrane; P:water transport; P:transmembrane transport; C:integral to membrane; C:mitochondrion; P:response to salt stress; F:transporter activity	-
isotig00219	mip pip subfamily	1056	10	5.50538e-140	94.3%	10	P:response to water deprivation; C:chloroplast envelope; C:vacuole; C:anchored to plasma membrane; P:water transport; P:transmembrane transport; C:integral to membrane; C:mitochondrion; P:response to salt stress; F:transporter activity	-
isotig00220	transcriptional activator demeter-like	1116	9	4.01913e-22	60.0%	1	F:catalytic activity	-
isotig00221	dna glycosylase	1044	8	4.29823e-19	60.75%	1	F:catalytic activity	-
isotig00222	disease resistance protein	1354	10	3.72514e-53	60.0%	1	F:nucleotide binding	-
isotig00223	cc-nbs-lrr resistance protein	728	10	1.06002e-20	56.2%	5	P:defense response; F:ATP binding; F:ADP binding; F:nucleotide binding; F:nucleoside-triphosphatase activity
isotig00224	pectinesterase family protein	1515	10	5.97619e-160	92.9%	14	P:regulation of plant-type hypersensitive response; F:aspartyl esterase activity; P:hydrogen peroxide catabolic process; P:response to fructose stimulus; P:response to salt stress; C:intracellular; F:pectinesterase activity; P:positive regulation of flavonoid biosynthetic process; P:cell wall modification; C:plant-type cell wall; F:enzyme inhibitor activity; P:protein targeting to membrane; P:neg…	EC:3.1.1.11
isotig00225	pectinesterase family protein	576	10	6.88138e-29	80.5%	13	P:regulation of plant-type hypersensitive response; F:aspartyl esterase activity; C:cell wall; P:response to fructose stimulus; P:response to salt stress; C:intracellular; F:pectinesterase activity; P:positive regulation of flavonoid biosynthetic process; P:cell wall modification; F:enzyme inhibitor activity; P:protein targeting to membrane; P:negative regulation of catalytic activity; P:water tr…	EC:3.1.1.11
isotig00226	probable e3 ubiquitin-protein ligase herc1-like	1138	10	1.51868e-90	85.3%	2	F:kinase activity; P:phosphorylation	-
isotig00227	probable e3 ubiquitin-protein ligase herc1-like	901	10	2.12316e-54	82.2%	2	F:kinase activity; P:phosphorylation	-
isotig00228	chloroplast sedoheptulose- -bisphosphatase	1406	10	4.42335e-165	96.6%	8	F:sedoheptulose-bisphosphatase activity; P:sucrose biosynthetic process; P:defense response to bacterium; C:chloroplast envelope; C:thylakoid; P:starch biosynthetic process; C:chloroplast stroma; C:apoplast	EC:3.1.3.37
isotig00229	amino acid dehydrogenase family protein	602	10	9.2594e-68	92.8%	10	C:cytosol; P:oxidation-reduction process; P:cellulose biosynthetic process; F:methylenetetrahydrofolate dehydrogenase (NADP+) activity; P:folic acid-containing compound biosynthetic process; F:methenyltetrahydrofolate cyclohydrolase activity; F:nucleotide binding; P:Golgi vesicle transport; C:chloroplast; P:cysteine biosynthetic process	EC:1.5.1.5; EC:3.5.4.9
isotig00230	ubiquitin-protein ligase 1	1462	10	8.8382e-160	56.5%	4	F:acid-amino acid ligase activity; C:intracellular membrane-bounded organelle; C:cytoplasmic part; P:cellular protein metabolic process	EC:6.3.2.0
isotig00231	e3 ubiquitin-protein ligase upl1-like	526	10	7.54225e-31	68.4%	7	P:protein ubiquitination; P:ubiquitin-dependent protein catabolic process; F:ubiquitin-protein ligase activity; C:nucleus; C:cytosol; C:mitochondrion; C:ubiquitin ligase complex	EC:6.3.2.19
isotig00232	senescence-associated protein	1027	10	1.77324e-79	84.6%	10	P:ethylene biosynthetic process; P:response to wounding; P:response to mechanical stimulus; C:Golgi apparatus; P:response to chitin; C:plasmodesma; C:plasma membrane; P:defense response to fungus; P:aging; C:integral to membrane	-
isotig00233	senescence-associated protein	968	10	2.97733e-81	84.8%	10	P:ethylene biosynthetic process; P:response to wounding; P:response to mechanical stimulus; C:Golgi apparatus; P:response to chitin; C:plasmodesma; C:plasma membrane; P:defense response to fungus; P:aging; C:integral to membrane	-
isotig00234	light-harvesting complex i protein lhca2	1031	10	9.37939e-121	94.3%	8	F:metal ion binding; P:photosynthesis, light harvesting; C:photosystem II; P:protein-chromophore linkage; F:chlorophyll binding; C:integral to membrane; C:photosystem I; C:chloroplast thylakoid membrane	-
isotig00235	light-harvesting complex i protein lhca2	949	10	8.26314e-121	94.3%	8	F:metal ion binding; P:photosynthesis, light harvesting; C:photosystem II; P:protein-chromophore linkage; F:chlorophyll binding; C:integral to membrane; C:photosystem I; C:chloroplast thylakoid membrane	-
isotig00236	eukaryotic translation initiation factor 4g-like	1152	10	4.16854e-128	74.6%	5	P:translational initiation; P:response to stimulus; F:DNA binding; F:translation initiation factor activity; P:RNA metabolic process	-
isotig00237	eukaryotic translation initiation factor 4g-like	770	10	8.00056e-58	67.1%	3	P:cellular macromolecule metabolic process; F:RNA binding; P:primary metabolic process	-
isotig00238	r2r3-myb transcription factor	975	10	2.05848e-122	79.3%	1	F:DNA binding	-
isotig00239	r2r3-myb transcription factor	915	10	8.93611e-109	76.6%	1	F:DNA binding	-
isotig00240	v-type proton atpase catalytic subunit a	979	10	5.45802e-131	98.5%	32	C:plant-type vacuole; C:vacuolar membrane; P:cytoskeleton organization; F:proton-transporting ATPase activity, rotational mechanism; P:pentose-phosphate shunt; P:gluconeogenesis; C:chloroplast envelope; P:water transport; P:ATP metabolic process; C:proton-transporting V-type ATPase, V1 domain; F:proton-transporting ATP synthase activity, rotational mechanism; P:calcium ion transport; P:response t…	-
isotig00241	v-type proton atpase catalytic subunit a	888	10	4.83194e-152	98.3%	32	C:plant-type vacuole; C:vacuolar membrane; P:cytoskeleton organization; F:proton-transporting ATPase activity, rotational mechanism; P:pentose-phosphate shunt; P:gluconeogenesis; C:chloroplast envelope; P:water transport; C:proton-transporting V-type ATPase, V1 domain; F:proton-transporting ATP synthase activity, rotational mechanism; P:calcium ion transport; P:response to salt stress; P:proteaso…	-
isotig00242	aldo keto	990	10	1.27435e-119	89.2%	5	C:chloroplast envelope; F:pyridoxine:NADP 4-dehydrogenase activity; P:response to cadmium ion; C:plasma membrane; P:oxidation-reduction process	EC:1.1.1.65
isotig00243	auxin-induced protein pcnt115 isoform 1	843	10	2.52608e-123	90.7%	5	C:chloroplast envelope; F:oxidoreductase activity; P:response to cadmium ion; C:plasma membrane; P:oxidation-reduction process	-
isotig00244	nuclear transport factor 2 and rna recognition motif domain-containing protein	938	10	6.74918e-26	78.5%	7	P:cell wall modification; C:intracellular; F:RNA binding; P:plant-type cell wall organization; P:photoperiodism, flowering; P:nucleocytoplasmic transport; F:nucleotide binding	-
isotig00245	nuclear transport factor 2 and rna recognition motif domain-containing protein	855	10	2.07427e-29	77.5%	7	P:cell wall modification; C:intracellular; F:RNA binding; P:plant-type cell wall organization; P:photoperiodism, flowering; P:nucleocytoplasmic transport; F:nucleotide binding	-
isotig00246	alanine-2-oxoglutarate aminotransferase 1	1422	10	0.0	95.5%	10	C:vacuole; F:alanine-glyoxylate transaminase activity; F:pyridoxal phosphate binding; C:peroxisome; F:L-alanine:2-oxoglutarate aminotransferase activity; P:photorespiration; F:glycine:2-oxoglutarate aminotransferase activity; C:chloroplast stroma; C:membrane; C:apoplast	EC:2.6.1.44; EC:2.6.1.2; EC:2.6.1.4
isotig00247	alanine aminotransferase	349	10	0.062546	95.3%	10	C:vacuole; F:alanine-glyoxylate transaminase activity; F:pyridoxal phosphate binding; C:peroxisome; F:L-alanine:2-oxoglutarate aminotransferase activity; P:photorespiration; F:glycine:2-oxoglutarate aminotransferase activity; C:chloroplast stroma; C:membrane; C:apoplast	EC:2.6.1.44; EC:2.6.1.2; EC:2.6.1.4
isotig00248	myb transcription factor myb93	882	10	1.24472e-72	86.5%	9	P:response to cadmium ion; P:response to gibberellin stimulus; P:response to abscisic acid stimulus; P:response to salt stress; P:response to salicylic acid stimulus; P:response to jasmonic acid stimulus; F:DNA binding; F:zinc ion binding; P:response to ethylene stimulus	-
isotig00249	myb-related transcription activator-like	855	10	1.1126e-66	79.8%	11	P:response to jasmonic acid stimulus; F:sequence-specific DNA binding transcription factor activity; P:response to gibberellin stimulus; F:DNA binding; P:response to cadmium ion; P:response to salicylic acid stimulus; P:response to abscisic acid stimulus; P:response to ethylene stimulus; F:zinc ion binding; P:response to salt stress; P:regulation of transcription, DNA-dependent	-
isotig00250	rna-binding protein	937	10	3.94428e-67	84.9%	14	F:poly(U) RNA binding; P:photosynthesis, light reaction; P:defense response to bacterium; P:response to cold; C:chloroplast envelope; P:response to abscisic acid stimulus; C:chloroplast thylakoid membrane; F:nucleotide binding; C:chloroplast stroma; C:ribonucleoprotein complex; P:mRNA processing; P:defense response, incompatible interaction; P:salicylic acid biosynthetic process; C:stromule	-
isotig00251	rna-binding protein	790	10	2.98843e-68	84.9%	14	F:poly(U) RNA binding; P:photosynthesis, light reaction; P:defense response to bacterium; P:response to cold; C:chloroplast envelope; P:response to abscisic acid stimulus; C:chloroplast thylakoid membrane; F:nucleotide binding; C:chloroplast stroma; C:ribonucleoprotein complex; P:mRNA processing; P:defense response, incompatible interaction; P:salicylic acid biosynthetic process; C:stromule	-
isotig00252	probable xyloglucan endotransglucosylase hydrolase protein 23-like	877	10	4.61576e-115	92.2%	5	P:cellular glucan metabolic process; F:hydrolase activity, hydrolyzing O-glycosyl compounds; C:apoplast; C:cell wall; F:xyloglucan:xyloglucosyl transferase activity	EC:3.2.1.0; EC:2.4.1.207
isotig00253	probable xyloglucan endotransglucosylase hydrolase protein 23	812	10	1.54505e-114	91.2%	5	P:cellular glucan metabolic process; F:hydrolase activity, hydrolyzing O-glycosyl compounds; C:apoplast; C:cell wall; F:xyloglucan:xyloglucosyl transferase activity	EC:3.2.1.0; EC:2.4.1.207
isotig00254	uncharacterized protein loc100263874	877	10	7.03238e-56	74.0%	4	F:nucleic acid binding; P:mRNA processing; F:nucleotide binding; C:plastid	-
isotig00255	uncharacterized protein loc100263874	806	10	9.59595e-66	74.2%	4	F:nucleic acid binding; P:mRNA processing; F:nucleotide binding; C:plastid	-
isotig00256	probable calcium-binding protein cml27-like	952	10	1.98236e-32	84.9%	14	P:response to absence of light; P:response to metal ion; F:calcium ion binding; P:response to cold; P:regulation of flower development; P:innate immune response; P:response to heat; P:response to auxin stimulus; P:long-day photoperiodism, flowering; P:response to abscisic acid stimulus; P:regulation of nitric oxide metabolic process; P:calcium-mediated signaling; P:response to hydrogen peroxide; …	-
isotig00257	probable calcium-binding protein cml27-like	673	10	6.47175e-33	84.9%	14	P:response to absence of light; P:response to metal ion; F:calcium ion binding; P:response to cold; P:regulation of flower development; P:innate immune response; P:response to heat; P:response to auxin stimulus; P:long-day photoperiodism, flowering; P:response to abscisic acid stimulus; P:regulation of nitric oxide metabolic process; P:calcium-mediated signaling; P:response to hydrogen peroxide; …	-
isotig00258	uncharacterized protein loc100257948	847	8	9.2693e-20	62.5%	0	-
isotig00259	uncharacterized protein loc100257948	766	7	1.34135e-08	6.48571e+13	0	-
isotig00260	light-harvesting complex i protein lhca1	799	10	1.01107e-102	95.3%	7	C:plastoglobule; C:chloroplast envelope; P:photosynthesis, light harvesting in photosystem I; P:response to blue light; P:response to far red light; P:response to red light; C:chloroplast thylakoid membrane	-
isotig00261	light-harvesting complex i protein lhca1	791	10	3.52216e-100	94.6%	7	C:plastoglobule; C:chloroplast envelope; P:photosynthesis, light harvesting in photosystem I; P:response to blue light; P:response to far red light; P:response to red light; C:chloroplast thylakoid membrane	-
isotig00262	quinone-oxidoreductase-like protein	1110	10	1.83169e-125	87.1%	10	F:NADPH:quinone reductase activity; C:chloroplast envelope; C:vacuole; C:Golgi apparatus; C:plasma membrane; C:cytosol; F:zinc ion binding; C:chloroplast thylakoid membrane; P:oxidation-reduction process; F:nucleotide binding	EC:1.6.5.5
isotig00263	protein	468	10	1.15926e-17	87.7%	10	C:chloroplast envelope; C:vacuole; F:oxidoreductase activity; C:Golgi apparatus; C:plasma membrane; C:cytosol; F:zinc ion binding; C:chloroplast thylakoid membrane; P:oxidation-reduction process; F:nucleotide binding	-
isotig00264	at1g31330 t19e23_1	819	10	3.7875e-61	89.1%	6	C:plastoglobule; C:chloroplast envelope; C:photosystem I reaction center; P:cysteine biosynthetic process; P:photosynthesis; C:chloroplast thylakoid membrane	-
isotig00265	at1g31330 t19e23_1	744	10	9.31876e-60	89.1%	6	C:plastoglobule; C:chloroplast envelope; C:photosystem I reaction center; P:cysteine biosynthetic process; P:photosynthesis; C:chloroplast thylakoid membrane	-
isotig00266	ribulose- -bisphosphate carboxylase oxygenase small subunit	807	10	9.06239e-67	88.9%	6	P:reductive pentose-phosphate cycle; F:ribulose-bisphosphate carboxylase activity; F:monooxygenase activity; P:photorespiration; C:chloroplast; P:oxidation-reduction process	EC:4.1.1.39
isotig00267	ribulose bisphosphate carboxylase small chloroplast	762	10	1.40544e-66	89.6%	6	P:reductive pentose-phosphate cycle; F:ribulose-bisphosphate carboxylase activity; F:monooxygenase activity; P:photorespiration; C:chloroplast; P:oxidation-reduction process	EC:4.1.1.39
isotig00268	40s ribosomal protein s3-3-like	801	10	7.9926e-108	96.5%	10	C:nucleolus; C:cytosolic ribosome; C:vacuole; F:structural constituent of ribosome; C:plasma membrane; F:RNA binding; C:small ribosomal subunit; C:chloroplast; P:translation; P:response to salt stress	-
isotig00269	40s ribosomal protein s3-3-like	760	10	2.79921e-107	96.4%	10	C:nucleolus; C:cytosolic ribosome; C:vacuole; F:structural constituent of ribosome; C:plasma membrane; F:RNA binding; C:small ribosomal subunit; C:chloroplast; P:translation; P:response to salt stress	-
isotig00270	t-complex protein 1 subunit epsilon-like	1040	10	1.36017e-151	97.3%	5	P:protein folding; C:cytoplasm; F:unfolded protein binding; F:ATP binding; C:plasma membrane	-
isotig00271	t-complex protein 1 subunit epsilon-like	493	10	2.20303e-63	96.3%	5	P:protein folding; C:cytoplasm; F:unfolded protein binding; F:ATP binding; C:plasma membrane	-
isotig00272	60s ribosomal protein	770	10	5.17177e-82	92.6%	9	P:translation; P:adaxial/abaxial pattern specification; C:nucleolus; F:rRNA binding; F:structural constituent of ribosome; C:chloroplast envelope; C:vacuolar membrane; C:cytosolic large ribosomal subunit; C:plasma membrane	-
isotig00273	60s ribosomal protein	741	10	4.85084e-81	92.6%	9	P:translation; P:adaxial/abaxial pattern specification; C:nucleolus; F:rRNA binding; F:structural constituent of ribosome; C:chloroplast envelope; C:vacuolar membrane; C:cytosolic large ribosomal subunit; C:plasma membrane	-
isotig00274	glutamine amidotransferase subunit	768	10	2.01728e-97	87.5%	7	P:glutamine metabolic process; F:glutaminase activity; P:embryo development ending in seed dormancy; F:transferase activity; C:cytosol; F:protein heterodimerization activity; P:pyridoxine biosynthetic process	EC:3.5.1.2
isotig00275	glutamine amidotransferase subunit	732	10	8.64385e-89	86.5%	7	P:glutamine metabolic process; F:glutaminase activity; P:embryo development ending in seed dormancy; F:transferase activity; C:cytosol; F:protein heterodimerization activity; P:pyridoxine biosynthetic process	EC:3.5.1.2
isotig00276	chloroplast ferredoxin i	780	10	5.60834e-34	86.8%	7	F:metal ion binding; F:electron carrier activity; P:photosynthetic electron transport chain; C:chloroplast stroma; F:2 iron, 2 sulfur cluster binding; P:response to light stimulus; P:response to karrikin	-
isotig00277	chloroplast ferredoxin i	713	10	4.74681e-34	86.8%	7	F:metal ion binding; F:electron carrier activity; P:photosynthetic electron transport chain; C:chloroplast stroma; F:2 iron, 2 sulfur cluster binding; P:response to light stimulus; P:response to karrikin	-
contig00208	cell wall-associated partial	4617	10	0.0	91.1%	2	F:hydrolase activity; C:chloroplast	-
contig00377	rrna intron-encoded homing endonuclease	530	10	1.44908e-21	68.4%	1	F:endonuclease activity
contig00484	mybr domain class transcription factor	738	10	3.18589e-09	68.0%	1	F:DNA binding	-
isotig00001	light-harvesting complex ii protein lhcb1	1038	10	1.36669e-119	95.9%	9	C:plastoglobule; C:chloroplast envelope; P:photosynthesis, light harvesting; P:response to blue light; C:apoplast; P:response to far red light; P:response to red light; C:chloroplast thylakoid membrane; C:mitochondrion	-
isotig00002	light-harvesting complex ii protein lhcb1	1021	10	1.85122e-129	96.8%	9	C:plastoglobule; C:chloroplast envelope; P:photosynthesis, light harvesting; P:response to blue light; C:apoplast; P:response to far red light; P:response to red light; C:chloroplast thylakoid membrane; C:mitochondrion	-
isotig00003	light-harvesting complex ii protein lhcb1	946	10	1.18701e-119	95.9%	9	C:plastoglobule; C:chloroplast envelope; P:photosynthesis, light harvesting; P:response to blue light; C:apoplast; P:response to far red light; P:response to red light; C:chloroplast thylakoid membrane; C:mitochondrion	-
isotig00004	light-harvesting complex ii protein lhcb1	983	10	1.76439e-129	96.8%	9	C:plastoglobule; C:chloroplast envelope; P:photosynthesis, light harvesting; P:response to blue light; C:apoplast; P:response to far red light; P:response to red light; C:chloroplast thylakoid membrane; C:mitochondrion	-
isotig00005	chlorophyll a b binding	921	10	5.09442e-128	96.6%	15	C:photosystem I; P:response to red light; F:chlorophyll binding; C:mitochondrion; C:integral to membrane; F:metal ion binding; P:protein-chromophore linkage; C:chloroplast envelope; P:response to blue light; C:chloroplast thylakoid membrane; C:photosystem II; C:plastoglobule; P:response to far red light; P:photosynthesis, light harvesting; C:apoplast	-
isotig00006	light-harvesting complex ii protein lhcb1	930	10	4.23545e-130	96.9%	9	C:plastoglobule; C:chloroplast envelope; P:photosynthesis, light harvesting; P:response to blue light; C:apoplast; P:response to far red light; P:response to red light; C:chloroplast thylakoid membrane; C:mitochondrion	-
isotig00007	chlorophyll a b binding	883	10	4.81007e-128	96.6%	15	C:photosystem I; P:response to red light; F:chlorophyll binding; C:mitochondrion; C:integral to membrane; F:metal ion binding; P:protein-chromophore linkage; C:chloroplast envelope; P:response to blue light; C:chloroplast thylakoid membrane; C:photosystem II; C:plastoglobule; P:response to far red light; P:photosynthesis, light harvesting; C:apoplast	-
isotig00278	photosystem ii core complex proteins chloroplastic-like	786	10	8.42087e-38	84.4%	6	C:chloroplast stromal thylakoid; F:manganese ion binding; C:photosystem II; C:integral to membrane; P:photosynthesis; C:chloroplast thylakoid membrane	-
isotig00279	photosystem ii core complex proteins chloroplastic-like	687	10	3.28006e-45	85.1%	6	C:chloroplast stromal thylakoid; F:manganese ion binding; C:photosystem II; C:integral to membrane; P:photosynthesis; C:chloroplast thylakoid membrane	-
isotig00280	late embryogenesis abundant hydroxyproline-rich glycoprotein	728	10	1.81271e-44	75.0%	1	C:plasmodesma	-
isotig00281	late embryogenesis abundant hydroxyproline-rich glycoprotein	720	10	1.7685e-44	75.0%	1	C:plasmodesma	-
isotig00282	eukaryotic translation initiation factor 5a2	745	10	7.14214e-69	97.2%	14	F:translation initiation factor activity; P:translational initiation; F:translation elongation factor activity; P:translational frameshifting; P:host programmed cell death induced by symbiont; P:defense response to bacterium; P:response to wounding; P:peptidyl-lysine modification to hypusine; P:positive regulation of translational termination; F:ribosome binding; P:xylem development; P:positive r…	-
isotig00283	eukaryotic translation initiation factor 5a1	696	10	3.72543e-44	76.8%	6	P:programmed cell death; P:translational elongation; P:response to bacterium; F:translation factor activity, nucleic acid binding; P:positive regulation of translation; P:response to stress	-
isotig00284	pgr5-like protein chloroplastic-like	799	10	1.02762e-46	93.8%	2	P:photosynthetic electron transport in photosystem I; C:chloroplast thylakoid membrane	-
isotig00285	pgr5-like protein 1a	628	10	3.54803e-93	96.1%	16	P:pentose-phosphate shunt; P:response to far red light; P:regulation of protein dephosphorylation; P:positive regulation of catalytic activity; P:starch biosynthetic process; P:response to red light; P:photosystem II assembly; P:chloroplast relocation; P:maltose metabolic process; P:defense response to bacterium; P:photosynthetic electron transport in photosystem I; P:PSII associated light-harves…	-
isotig00286	apoptotic chromatin condensation inducer in the nucleus	746	10	5.75077e-26	60.2%	3	F:nucleic acid binding; C:chloroplast; C:cytosol
isotig00287	apoptotic chromatin condensation inducer in the nucleus	646	10	3.36513e-33	57.2%	3	F:nucleic acid binding; C:chloroplast; C:cytosol
isotig00288	fasciclin-like arabinogalactan protein	1037	10	4.84873e-52	82.8%	4	P:shoot system development; C:anchored to plasma membrane; C:cell wall; P:root development	-
isotig00289	fasciclin-like arabinogalactan protein 11	360	1	4295	80.0%	0	-
isotig00290	calcium-binding protein cml27	715	10	7.1367e-38	78.1%	3	C:vacuole; F:calcium ion binding; C:plasma membrane	-
isotig00291	calcium-binding protein cml27	671	10	1.27411e-38	77.7%	3	C:vacuole; F:calcium ion binding; C:plasma membrane	-
isotig00292	zinc finger ccch domain-containing protein	705	10	1.06889e-82	78.9%	2	F:zinc ion binding; F:nucleic acid binding	-
isotig00293	zinc finger ccch domain-containing protein	646	10	1.22145e-75	73.4%	1	F:binding	-
isotig00294	40s ribosomal protein s8-like	885	10	9.44862e-65	98.5%	4	C:ribosome; F:structural constituent of ribosome; F:zinc ion binding; P:translation	-
isotig00295	40s ribosomal protein s8	477	10	4.35496e-19	96.6%	4	C:ribosome; F:structural constituent of ribosome; P:translation; C:mitochondrion	-
isotig00296	oxygen-evolving enhancer protein chloroplast	695	10	2.65747e-58	87.2%	11	C:chloroplast photosystem II; C:extrinsic to membrane; F:calcium ion binding; P:cellular cation homeostasis; C:chloroplast stroma; P:photosynthesis; P:divalent metal ion transport; P:photorespiration; C:oxygen evolving complex; C:chloroplast thylakoid lumen; C:apoplast	-
isotig00297	oxygen-evolving enhancer protein chloroplast	666	10	1.2383e-71	89.1%	8	C:chloroplast thylakoid lumen; C:extrinsic to membrane; F:calcium ion binding; C:chloroplast stroma; C:apoplast; P:photosynthesis; C:chloroplast thylakoid membrane; C:oxygen evolving complex	-
isotig00298	26s proteasome regulatory subunit	696	10	3.13917e-59	90.4%	6	P:regulation of protein catabolic process; C:plasma membrane; F:enzyme regulator activity; C:proteasome complex; P:regulation of catalytic activity; C:nucleus	-
isotig00299	26s proteasome regulatory subunit	653	10	1.71015e-48	86.9%	6	P:regulation of protein catabolic process; C:plasma membrane; F:enzyme regulator activity; C:proteasome complex; P:regulation of catalytic activity; C:nucleus	-
isotig00300	40s ribosomal protein s23	673	10	4.88708e-58	97.2%	4	C:nucleolus; F:structural constituent of ribosome; C:cytosolic small ribosomal subunit; P:translation	-
isotig00301	40s ribosomal protein s23	658	10	4.68304e-58	98.2%	4	C:nucleolus; F:structural constituent of ribosome; C:cytosolic small ribosomal subunit; P:translation	-
isotig00302	trihelix dna-binding protein	720	10	3.07468e-27	80.7%	3	F:sequence-specific DNA binding transcription factor activity; F:DNA binding; P:regulation of transcription, DNA-dependent	-
isotig00303	protein	590	10	8.4717e-39	83.9%	6	P:negative regulation of cell growth; P:trichome morphogenesis; F:DNA binding; P:negative regulation of DNA endoreduplication; P:regulation of cell size; C:nucleus	-
isotig00304	ribonuclease uk114-like	716	10	2.98453e-52	80.7%	11	C:mitochondrion; P:response to salt stress; C:chloroplast envelope; F:endoribonuclease activity; C:thylakoid; P:glycolysis; C:chloroplast stroma; P:gluconeogenesis; C:vacuole; P:response to cadmium ion; P:glucosinolate biosynthetic process	-
isotig00305	ribonuclease uk114-like	607	10	9.17517e-51	88.4%	5	P:response to cadmium ion; C:vacuole; C:thylakoid; C:mitochondrion; C:chloroplast	-
isotig00306	translationally controlled tumor protein	708	10	8.44513e-60	95.6%	1	C:cytoplasm	-
isotig00307	translationally controlled tumor protein	614	10	4.13968e-59	95.0%	1	C:cytoplasm	-
isotig00308	60s ribosomal protein	669	10	1.53552e-52	91.9%	6	F:structural constituent of ribosome; C:plasma membrane; C:cell wall; C:cytosolic large ribosomal subunit; C:chloroplast; P:translation	-
isotig00309	60s ribosomal protein	639	10	1.40845e-52	91.9%	6	F:structural constituent of ribosome; C:plasma membrane; C:cell wall; C:cytosolic large ribosomal subunit; C:chloroplast; P:translation	-
isotig00310	oligopeptidase a	656	10	1.89183e-84	88.8%	8	F:metal ion binding; P:methylglyoxal catabolic process to D-lactate; F:metalloendopeptidase activity; P:response to cadmium ion; C:chloroplast stroma; P:proteolysis; C:cytosol; C:apoplast	EC:3.4.24.0
isotig00311	oligopeptidase a	654	10	6.46088e-40	95.0%	8	F:metal ion binding; P:methylglyoxal catabolic process to D-lactate; F:metalloendopeptidase activity; P:response to cadmium ion; C:chloroplast stroma; P:proteolysis; C:cytosol; C:apoplast	EC:3.4.24.0
isotig00312	tir-nbs-lrr resistance protein	730	10	3.73882e-41	70.1%	1	P:response to stimulus	-
isotig00313	tir-nbs-lrr resistance protein	556	10	8.06781e-29	69.2%	1	P:response to stimulus	-
isotig00314	histone ubiquitination proteins group	634	10	8.02726e-77	99.5%	8	P:ubiquitin-dependent protein catabolic process; P:negative regulation of flower development; P:histone H2B ubiquitination; P:UV protection; P:leaf morphogenesis; P:vegetative to reproductive phase transition of meristem; F:ubiquitin-protein ligase activity; F:ATP binding	EC:6.3.2.19
isotig00315	histone ubiquitination proteins group	628	10	5.26859e-73	99.7%	8	P:ubiquitin-dependent protein catabolic process; P:negative regulation of flower development; P:histone H2B ubiquitination; P:UV protection; P:leaf morphogenesis; P:vegetative to reproductive phase transition of meristem; F:ubiquitin-protein ligase activity; F:ATP binding	EC:6.3.2.19
isotig00316	transcription factor ilr3	798	10	5.10716e-64	86.7%	0	-
isotig00317	protein	468	10	9.18538e-15	69.1%	0	-
isotig00318	histone h2	695	10	1.98458e-30	95.2%	8	C:cell wall; C:nucleosome; C:nucleolus; P:DNA mediated transformation; P:response to wounding; P:response to bacterium; F:DNA binding; P:nucleosome assembly	-
isotig00319	histone h2	572	10	1.33359e-29	95.2%	8	C:cell wall; C:nucleosome; C:nucleolus; P:DNA mediated transformation; P:response to wounding; P:response to bacterium; F:DNA binding; P:nucleosome assembly	-
isotig00320	polyubiquitin 3	800	10	1.61419e-100	99.4%	7	P:protein targeting to vacuole; C:vacuole; P:response to UV-B; P:cellular protein modification process; P:ubiquitin-dependent protein catabolic process; P:vesicle-mediated transport; C:nucleus	-
isotig00321	multidrug resistance protein abc transporter family	468	10	7.19066e-62	100.0%	0	-
isotig00322	npr1-1 protein	628	10	1.04679e-44	82.4%	5	P:regulation of jasmonic acid mediated signaling pathway; P:regulation of salicylic acid mediated signaling pathway; P:defense response to fungus, incompatible interaction; C:nucleus; P:defense response to bacterium, incompatible interaction	-
isotig00323	npr1-1 protein	610	10	3.77714e-44	81.1%	5	P:regulation of jasmonic acid mediated signaling pathway; P:regulation of salicylic acid mediated signaling pathway; P:defense response to fungus, incompatible interaction; C:nucleus; P:defense response to bacterium, incompatible interaction	-
isotig00324	dormancy-associated 1	666	10	1.19012e-21	81.7%	3	P:response to glucose stimulus; P:response to fructose stimulus; P:response to sucrose stimulus	-
isotig00325	auxin-repressed protein	590	10	4.55727e-28	85.7%	0	-
isotig00326	nbs-lrr resistance-like protein 4g	721	10	7.01235e-41	70.1%	1	P:response to stimulus	-
isotig00327	tmv resistance protein n-like	529	10	3.44106e-31	69.2%	4	P:defense response; F:ADP binding; P:signal transduction; C:intracellular
isotig00328	transcription factor	697	10	1.19012e-66	82.2%	3	F:sequence-specific DNA binding transcription factor activity; F:sequence-specific DNA binding; P:regulation of transcription, DNA-dependent	-
isotig00329	wrky transcription factor 11	495	10	1.46931e-39	92.4%	10	P:intracellular signal transduction; F:calmodulin binding; P:defense response to bacterium; P:regulation of transcription, DNA-dependent; P:respiratory burst involved in defense response; F:sequence-specific DNA binding; P:response to chitin; F:sequence-specific DNA binding transcription factor activity; C:nucleus; P:amino acid transport	-
isotig00330	---NA---	671	0			0	-
isotig00331	---NA---	503	0			0	-
isotig00332	leucine-rich repeat receptor protein kinase exs-like	660	10	1.01113e-35	54.4%	1	F:kinase activity	-
isotig00333	leucine-rich repeat receptor protein kinase exs-like	503	10	6.44638e-15	77.7%	8	F:receptor activity; F:non-membrane spanning protein tyrosine kinase activity; P:protein phosphorylation; F:ATP binding; F:2-alkenal reductase [NAD(P)] activity; C:integral to membrane; F:protein serine/threonine kinase activity; P:oxidation-reduction process	EC:2.7.10.2; EC:1.3.1.74; EC:2.7.11.0
isotig00334	ultraviolet-b-repressible protein	613	10	2.14506e-14	92.3%	3	C:photosystem II; P:photosynthesis; C:chloroplast thylakoid membrane	-
isotig00335	ultraviolet-b-repressible protein	570	10	3.02316e-06	84.5%	3	C:photosystem II; P:photosynthesis; C:chloroplast thylakoid membrane	-
isotig00336	amidase family protein	676	10	6.354e-54	81.8%	7	C:integral to chloroplast outer membrane; P:nucleotide biosynthetic process; F:carbon-nitrogen ligase activity, with glutamine as amido-N-donor; F:amidase activity; F:transferase activity; F:protein binding; P:protein transport	EC:6.3.5.0; EC:3.5.1.4
isotig00337	---NA---	482	0			0	-
isotig00338	abc transporter b family member 1-like	674	10	6.87409e-78	95.3%	29	P:vernalization response; P:acropetal auxin transport; F:ferric-transporting ATPase activity; P:cell adhesion; P:embryo development ending in seed dormancy; P:actin nucleation; P:positive gravitropism; P:response to nematode; C:integral to membrane; P:anthocyanin accumulation in tissues in response to UV light; F:auxin efflux transmembrane transporter activity; P:photomorphogenesis; P:basipetal a…	EC:3.6.3.30; EC:3.6.3.44
isotig00339	abc transporter b family member 1-like	501	10	7.25843e-33	74.1%	28	P:vernalization response; P:acropetal auxin transport; P:cell adhesion; P:embryo development ending in seed dormancy; F:nucleotide binding; P:actin nucleation; P:positive gravitropism; P:response to nematode; C:integral to membrane; P:anthocyanin accumulation in tissues in response to UV light; F:auxin efflux transmembrane transporter activity; P:photomorphogenesis; P:basipetal auxin transport; P…	-
isotig00340	beta-amylase	664	10	1.02719e-24	83.3%	6	F:cation binding; F:sequence-specific DNA binding transcription factor activity; F:beta-amylase activity; P:polysaccharide catabolic process; C:nucleus; P:regulation of shoot system development	EC:3.2.1.2
isotig00341	beta-amylase 8-like	478	10	9.58999e-58	80.1%	5	P:carbohydrate metabolic process; F:sequence-specific DNA binding transcription factor activity; F:beta-amylase activity; C:nucleus; P:regulation of shoot system development	EC:3.2.1.2
isotig00342	nucleosome assembly	683	10	2.72608e-76	91.5%	8	P:DNA mediated transformation; F:DNA binding; P:response to cadmium ion; P:nucleosome assembly; C:plasma membrane; C:nucleus; C:cytosol; P:DNA repair	-
isotig00343	nucleosome chromatin assembly factor group	472	10	1.80866e-21	96.5%	8	C:cytoplasm; P:DNA mediated transformation; P:response to cadmium ion; P:nucleosome assembly; F:chromatin binding; C:plasma membrane; P:nucleotide-excision repair; C:nucleus	-
isotig00344	bzip transcription factor bzip68	670	10	8.88508e-16	68.7%	7	P:regulation of transcription, DNA-dependent; F:sequence-specific DNA binding; P:response to chitin; F:protein dimerization activity; P:endoplasmic reticulum unfolded protein response; F:sequence-specific DNA binding transcription factor activity; C:endoplasmic reticulum membrane	-
isotig00345	bzip transcription factor protein	485	10	5.55012e-17	69.3%	7	P:regulation of transcription, DNA-dependent; F:sequence-specific DNA binding; P:response to chitin; F:protein dimerization activity; P:endoplasmic reticulum unfolded protein response; F:sequence-specific DNA binding transcription factor activity; C:endoplasmic reticulum membrane	-
isotig00346	ethylene-responsive transcription	585	10	3.33902e-35	82.6%	4	F:sequence-specific DNA binding transcription factor activity; F:DNA binding; C:nucleus; P:regulation of transcription, DNA-dependent	-
isotig00347	ethylene-responsive transcription	582	10	1.50408e-36	82.1%	4	F:sequence-specific DNA binding transcription factor activity; F:DNA binding; C:nucleus; P:regulation of transcription, DNA-dependent	-
isotig00348	constans 1	605	10	3.82773e-33	74.3%	3	P:photoperiodism; F:binding; C:intracellular	-
isotig00349	constans 1	544	10	9.45487e-32	75.0%	7	P:photoperiodism; F:binding; C:intracellular; P:post-embryonic development; P:regulation of cellular process; P:reproductive structure development; P:response to far red light	-
isotig00350	40s ribosomal protein s13	730	10	1.70648e-50	97.2%	3	F:structural constituent of ribosome; C:cytosolic small ribosomal subunit; P:translation	-
isotig00351	---NA---	428	0			0	-
isotig00352	gata transcription factor 9-like	691	10	3.00758e-30	83.8%	5	F:zinc ion binding; F:sequence-specific DNA binding; F:sequence-specific DNA binding transcription factor activity; P:positive regulation of transcription, DNA-dependent; C:nucleus	-
isotig00353	gata transcription factor 9-like	475	10	1.24964e-30	83.8%	5	F:zinc ion binding; F:sequence-specific DNA binding; F:sequence-specific DNA binding transcription factor activity; P:positive regulation of transcription, DNA-dependent; C:nucleus	-
isotig00354	arf gtpase-activating	658	10	9.19043e-10	88.9%	4	C:cytosol; F:ARF GTPase activator activity; P:regulation of ARF GTPase activity; F:zinc ion binding	-
isotig00355	adp-ribosylation factor gtpase-activating protein agd6	506	10	1.05499e-31	88.8%	8	C:cytosol; F:ARF GTPase activator activity; P:regulation of ARF GTPase activity; F:zinc ion binding; P:cellulose biosynthetic process; F:DNA binding; P:Golgi vesicle transport; C:nucleus	-
isotig00356	uncharacterized protein loc100812174	584	10	2.98845e-22	62.1%	0	-
isotig00357	uncharacterized protein	576	10	3.93189e-29	65.4%	3	F:molecular_function; P:biological_process; C:cellular_component
isotig00358	16kda membrane protein	594	10	2.11339e-37	85.7%	2	C:photosystem I; C:chloroplast	-
isotig00359	photosystem i subunit o	562	10	2.21815e-42	91.2%	11	C:photosystem I; P:pentose-phosphate shunt; P:regulation of protein dephosphorylation; P:cellular cation homeostasis; P:photosystem II assembly; C:chloroplast; P:divalent metal ion transport; P:cysteine biosynthetic process; P:plastid organization; P:photosynthesis, light harvesting in photosystem I; P:rRNA processing	-
isotig00360	leucine-rich repeat family protein	631	10	1.94385e-64	69.8%	2	C:chloroplast; P:cellular response to nitrogen starvation	-
isotig00361	serine-threonine protein plant-	516	10	2.48286e-56	70.9%	3	F:kinase activity; P:phosphorylation; C:chloroplast
isotig00362	beta-tubulin 2	679	10	2.09593e-113	99.5%	8	C:microtubule; P:protein polymerization; P:GTP catabolic process; P:microtubule-based movement; F:GTPase activity; F:structural molecule activity; C:cytoplasm; F:GTP binding	-
isotig00363	beta-tubulin 2	447	10	3.36238e-57	100.0%	8	C:microtubule; P:protein polymerization; P:GTP catabolic process; P:microtubule-based movement; F:GTPase activity; F:structural molecule activity; C:cytoplasm; F:GTP binding	-
isotig00364	transcriptional corepressor leunig-like isoform 2	867	10	4.14593e-73	90.4%	0	-
isotig00365	transcriptional corepressor leunig-like isoform 2	270	10	1.00844e-30	96.6%	2	P:flower development; F:protein heterodimerization activity	-
isotig00366	probable methionyl-trna synthetase	622	10	6.4274e-77	88.4%	8	C:cytoplasm; P:response to cadmium ion; F:electron carrier activity; P:methionyl-tRNA aminoacylation; F:ATP binding; F:methionine-tRNA ligase activity; F:tRNA binding; P:electron transport chain	EC:6.1.1.10
isotig00367	probable methionyl-trna synthetase	505	10	8.26054e-25	88.6%	8	C:cytoplasm; P:response to cadmium ion; F:electron carrier activity; P:methionyl-tRNA aminoacylation; F:ATP binding; F:methionine-tRNA ligase activity; F:tRNA binding; P:electron transport chain	EC:6.1.1.10
isotig00368	protein	639	10	6.77045e-47	72.8%	1	F:lyase activity	-
isotig00369	glutathione s-	488	10	1.26844e-28	70.0%	1	F:lyase activity	-
isotig00370	uncharacterized protein loc100784390	569	10	1.49851e-41	95.3%	2	P:translational initiation; F:translation initiation factor activity	-
isotig00371	translation factor	541	10	2.02529e-32	94.4%	2	P:translational initiation; F:translation initiation factor activity	-
isotig00372	sumo-conjugating enzyme sce1-like	642	10	2.66698e-62	97.4%	6	P:embryo development ending in seed dormancy; P:protein sumoylation; F:SUMO ligase activity; F:ATP binding; P:response to abscisic acid stimulus; C:nucleus	-
isotig00373	sumo-conjugating enzyme sce1-like	452	10	1.57416e-67	97.4%	6	P:embryo development ending in seed dormancy; P:protein sumoylation; F:SUMO ligase activity; F:ATP binding; P:response to abscisic acid stimulus; C:nucleus	-
isotig00374	cbs domain-containing protein cbsx5-like	586	10	2.28988e-29	71.7%	3	P:response to wounding; P:metabolic process; F:catalytic activity
isotig00375	cbs domain-containing protein cbsx5-like	520	10	1.11544e-14	70.9%	3	P:response to wounding; P:metabolic process; F:catalytic activity
isotig00376	bes1 bzr1-like protein	721	10	4.66892e-35	73.9%	1	C:vacuole	-
isotig00377	predicted protein [Populus trichocarpa]	354	2	1876.36	87.0%	1	C:vacuole	-
isotig00008	light-harvesting complex ii protein lhcb1	892	10	4.00312e-130	96.9%	9	C:plastoglobule; C:chloroplast envelope; P:photosynthesis, light harvesting; P:response to blue light; C:apoplast; P:response to far red light; P:response to red light; C:chloroplast thylakoid membrane; C:mitochondrion	-
isotig00009	cell division cycle protein 48 homolog	2290	10	0.0	98.0%	13	C:cell wall; P:cell cycle; F:identical protein binding; P:cell division; F:ATP binding; F:microtubule-severing ATPase activity; P:pollen tube growth; C:spindle; C:nuclear envelope; P:pollen germination; C:cytosolic ribosome; C:phragmoplast; C:plasma membrane	EC:3.6.4.3
isotig00010	cell division cycle protein 48 homolog	2290	10	0.0	98.0%	14	C:cell wall; C:nucleolus; F:identical protein binding; P:cell division; F:ATP binding; F:microtubule-severing ATPase activity; P:pollen tube growth; C:spindle; C:nuclear envelope; P:pollen germination; P:response to cadmium ion; C:cytosolic ribosome; C:phragmoplast; C:plasma membrane	EC:3.6.4.3
isotig00011	cell division cycle protein 48 homolog	2123	10	0.0	99.0%	13	C:cell wall; P:cell cycle; F:identical protein binding; P:cell division; F:ATP binding; F:microtubule-severing ATPase activity; P:pollen tube growth; C:spindle; C:nuclear envelope; P:pollen germination; C:cytosolic ribosome; C:phragmoplast; C:plasma membrane	EC:3.6.4.3
isotig00012	cell division cycle protein 48 homolog	2123	10	0.0	99.0%	15	C:cell wall; P:cell cycle; C:nucleolus; F:identical protein binding; P:cell division; F:ATP binding; F:microtubule-severing ATPase activity; P:pollen tube growth; C:spindle; C:nuclear envelope; P:pollen germination; P:response to cadmium ion; C:cytosolic ribosome; C:phragmoplast; C:plasma membrane	EC:3.6.4.3
isotig00013	cell division cycle protein 48 homolog	2071	10	0.0	98.0%	13	C:cell wall; P:cell cycle; F:identical protein binding; P:cell division; F:ATP binding; F:microtubule-severing ATPase activity; P:pollen tube growth; C:spindle; C:nuclear envelope; P:pollen germination; C:cytosolic ribosome; C:phragmoplast; C:plasma membrane	EC:3.6.4.3
isotig00014	cell division cycle protein 48 homolog	2071	10	0.0	98.0%	14	C:cell wall; C:nucleolus; F:identical protein binding; P:cell division; F:ATP binding; F:microtubule-severing ATPase activity; P:pollen tube growth; C:spindle; C:nuclear envelope; P:pollen germination; P:response to cadmium ion; C:cytosolic ribosome; C:phragmoplast; C:plasma membrane	EC:3.6.4.3
isotig00015	cell division cycle protein 48 homolog	1904	10	0.0	99.0%	13	C:cell wall; P:cell cycle; F:identical protein binding; P:cell division; F:ATP binding; F:microtubule-severing ATPase activity; P:pollen tube growth; C:spindle; C:nuclear envelope; P:pollen germination; C:cytosolic ribosome; C:phragmoplast; C:plasma membrane	EC:3.6.4.3
isotig00016	cell division cycle protein 48 homolog	1904	10	0.0	99.0%	15	C:cell wall; P:cell cycle; C:nucleolus; F:identical protein binding; P:cell division; F:ATP binding; F:microtubule-severing ATPase activity; P:pollen tube growth; C:spindle; C:nuclear envelope; P:pollen germination; P:response to cadmium ion; C:cytosolic ribosome; C:phragmoplast; C:plasma membrane	EC:3.6.4.3
isotig00017	transitional endoplasmic reticulum	1726	10	0.0	99.0%	14	C:cell wall; C:nucleolus; F:identical protein binding; P:cell division; F:ATP binding; F:microtubule-severing ATPase activity; P:pollen tube growth; C:spindle; C:nuclear envelope; P:pollen germination; P:response to cadmium ion; C:cytosolic ribosome; C:phragmoplast; C:plasma membrane	EC:3.6.4.3
isotig00378	histone ubiquitination proteins group	677	10	2.04408e-18	83.7%	44	P:sugar mediated signaling pathway; P:histone methylation; F:protein homodimerization activity; P:cotyledon development; P:mRNA export from nucleus; P:leaf morphogenesis; P:glucuronoxylan metabolic process; P:cell division; P:protein deubiquitination; P:response to freezing; P:regulation of timing of cell differentiation; P:G2 phase of mitotic cell cycle; P:RNA processing; P:maintenance of merist…	EC:6.3.2.19
isotig00379	histone ubiquitination proteins group	389	10	5.20687e-11	79.3%	44	P:sugar mediated signaling pathway; P:histone methylation; F:protein homodimerization activity; P:cotyledon development; P:mRNA export from nucleus; P:leaf morphogenesis; P:glucuronoxylan metabolic process; P:cell division; P:protein deubiquitination; P:response to freezing; P:regulation of timing of cell differentiation; P:G2 phase of mitotic cell cycle; P:RNA processing; P:maintenance of merist…	EC:6.3.2.19
isotig00380	photosystem i reaction center subunit chloroplast	543	10	7.49154e-29	92.2%	4	C:plastoglobule; C:photosystem I reaction center; P:photosynthesis; C:chloroplast thylakoid membrane	-
isotig00381	photosystem i reaction center subunit chloroplast	525	10	2.22851e-35	90.8%	10	C:integral to membrane; C:photosystem I reaction center; P:photosynthetic electron transport in photosystem I; P:rRNA processing; P:plastid organization; C:chloroplast thylakoid membrane; C:plastoglobule; P:photosystem II assembly; P:cysteine biosynthetic process; P:regulation of protein dephosphorylation	-
isotig00382	protein	563	8	30.756	91.0%	1	P:hydrogen peroxide catabolic process	-
isotig00383	protein	498	8	22.3947	91.0%	1	P:hydrogen peroxide catabolic process	-
isotig00384	60s ribosomal protein l17-2-like	582	10	6.7064e-72	94.7%	7	C:nucleolus; F:structural constituent of ribosome; C:plasma membrane; C:vacuolar membrane; C:cytosolic large ribosomal subunit; C:chloroplast; P:translation	-
isotig00385	60s ribosomal protein l17-2-like	481	10	1.11469e-51	97.6%	7	C:nucleolus; C:vacuole; F:structural constituent of ribosome; C:plasma membrane; C:cytosolic large ribosomal subunit; C:chloroplast; P:translation	-
isotig00386	casein kinase i isoform delta-like isoform 1	540	10	2.79788e-65	97.1%	7	P:unidimensional cell growth; P:root development; P:protein phosphorylation; F:ATP binding; P:response to brassinosteroid stimulus; F:protein serine/threonine kinase activity; P:auxin metabolic process	EC:2.7.11.0
isotig00387	casein kinase i isoform delta-like	518	10	8.393e-64	97.6%	7	P:unidimensional cell growth; P:root development; P:protein phosphorylation; F:ATP binding; P:response to brassinosteroid stimulus; F:protein serine/threonine kinase activity; P:auxin metabolic process	EC:2.7.11.0
isotig00388	iap-like protein 1	531	10	3.42489e-53	76.1%	10	F:translation repressor activity; C:cytosol; F:zinc ion binding; P:protein import into peroxisome matrix; P:fatty acid beta-oxidation; P:DNA endoreduplication; P:positive regulation of cell proliferation; P:negative regulation of transcription, DNA-dependent; C:phragmoplast; C:nucleus	-
isotig00389	iap-like protein 1	510	10	4.77744e-48	75.1%	10	F:translation repressor activity; C:cytosol; F:zinc ion binding; P:protein import into peroxisome matrix; P:fatty acid beta-oxidation; P:DNA endoreduplication; P:positive regulation of cell proliferation; P:negative regulation of transcription, DNA-dependent; C:phragmoplast; C:nucleus	-
isotig00390	---NA---	529	0			0	-
isotig00391	---NA---	517	0			0	-
isotig00392	calcium-binding allergen ole	506	10	7.32916e-17	67.7%	2	F:calcium ion binding; C:plasma membrane
isotig00393	calcium-binding allergen ole	508	10	4.52729e-14	66.6%	2	F:calcium ion binding; C:plasma membrane
isotig00394	phenazine biosynthesis	609	10	1.60171e-10	85.3%	2	F:isomerase activity; P:biosynthetic process	-
isotig00395	phenazine biosynthesis	415	10	1.71429e-38	78.7%	2	P:biosynthetic process; F:catalytic activity	-
isotig00396	succinate dehydrogenase	650	10	6.44363e-82	99.6%	5	F:flavin adenine dinucleotide binding; P:tricarboxylic acid cycle; F:succinate dehydrogenase (ubiquinone) activity; C:mitochondrion; P:electron transport chain	EC:1.3.5.1
isotig00397	succinate dehydrogenase	367	10	3.35016e-10	81.8%	5	F:flavin adenine dinucleotide binding; F:oxidoreductase activity, acting on the CH-CH group of donors; P:tricarboxylic acid cycle; C:mitochondrion; P:electron transport chain	-
isotig00398	ankyrin repeat-containing	506	10	6.42066e-13	79.9%	2	C:plasma membrane; C:endoplasmic reticulum	-
isotig00399	ankyrin repeat-containing	501	10	3.2278e-46	81.7%	2	C:plasma membrane; C:endoplasmic reticulum	-
isotig00400	nitrite transporter	615	10	2.62274e-61	89.1%	3	C:integral to membrane; P:oligopeptide transport; F:transporter activity	-
isotig00401	leucine-rich repeat	379	10	2.00524e-15	69.3%	3	F:oxidoreductase activity; F:kinase activity; P:phosphorylation	-
isotig00402	lipoxygenase	500	10	1.01512e-31	82.2%	18	P:defense response by callose deposition; P:response to jasmonic acid stimulus; P:response to ozone; P:oxidation-reduction process; P:response to fungus; P:response to wounding; P:growth; P:stamen filament development; P:jasmonic acid biosynthetic process; P:response to bacterium; P:response to chitin; P:pollen development; C:chloroplast thylakoid; C:chloroplast stroma; F:linoleate 13S-lipoxygena…	EC:1.13.11.12
isotig00403	lipoxygenase 4	477	10	1.21033e-60	90.2%	18	P:defense response by callose deposition; P:response to jasmonic acid stimulus; P:response to ozone; P:oxidation-reduction process; P:response to fungus; P:response to wounding; P:growth; P:stamen filament development; P:jasmonic acid biosynthetic process; P:response to bacterium; P:response to chitin; P:pollen development; C:chloroplast thylakoid; C:chloroplast stroma; F:linoleate 13S-lipoxygena…	EC:1.13.11.12
isotig00404	glycerophosphoryl diester phosphodiesterase family protein	575	10	2.63126e-33	79.0%	17	P:glycerol metabolic process; P:cell adhesion; C:anchored to plasma membrane; P:actin nucleation; F:glycerophosphodiester phosphodiesterase activity; P:regulation of meristem growth; P:cell wall pectin metabolic process; P:trichome morphogenesis; P:starch metabolic process; P:lipid metabolic process; P:root hair cell differentiation; P:guard cell morphogenesis; P:plant-type cell wall biogenesis; …	EC:3.1.4.46
isotig00405	---NA---	414	0			0	-
isotig00406	uncharacterized protein loc100266950	541	10	1.56122e-42	86.2%	2	F:chaperone binding; C:mitochondrion	-
isotig00407	uncharacterized protein loc100266950	403	10	6.02025e-20	89.6%	2	F:chaperone binding; P:apoptotic process	-
isotig00408	two-component response regulator arr2-like	554	10	0.00336451	53.7%	2	P:regulation of cellular metabolic process; P:signal transduction	-
isotig00409	type-b response regulator	389	10	7.021e-17	54.8%	3	P:response to stimulus; P:regulation of cellular process; P:cellular metabolic process	-
isotig00410	beta-expansin allergen protein	572	10	4.0883e-79	92.7%	6	P:plant-type cell wall loosening; C:plasmodesma; P:unidimensional cell growth; C:extracellular region; P:sexual reproduction; P:syncytium formation	-
isotig00411	expansin b3	371	10	1.54686e-15	91.4%	6	P:plant-type cell wall loosening; C:plasmodesma; P:unidimensional cell growth; C:extracellular region; P:sexual reproduction; P:syncytium formation	-
isotig00412	chromosome-associated kinesin kif4a-like	527	10	5.33044e-77	92.4%	6	C:cytoplasm; P:microtubule-based movement; P:cellulose microfibril organization; F:ATP binding; F:microtubule motor activity; C:microtubule	-
isotig00413	kinesin-like protein	402	10	0.0030133	93.0%	6	C:cytoplasm; P:microtubule-based movement; P:cellulose microfibril organization; F:ATP binding; F:microtubule motor activity; C:microtubule	-
isotig00414	regulator of chromosome condensation domain-containing protein	491	10	6.79332e-55	95.7%	2	F:chromatin binding; F:Ran GTPase binding	-
isotig00415	regulator of chromosome condensation family protein	388	10	2.26293e-23	92.3%	2	F:chromatin binding; F:Ran GTPase binding	-
isotig00416	---NA---	504	0			0	-
isotig00417	---NA---	393	0			0	-
isotig00418	calmodulin binding	483	4	0.0118109	82.75%	3	C:cytosol; C:plasma membrane; C:vacuole	-
isotig00419	iq domain-containing protein	434	10	4.56015e-31	75.0%	1	C:cytoplasmic part	-
isotig00420	protein binding	486	10	2.30493e-54	90.8%	8	C:chloroplast envelope; P:response to wounding; P:carotenoid biosynthetic process; P:myo-inositol hexakisphosphate biosynthetic process; F:RNA binding; C:chloroplast stroma; P:photosynthesis; C:chloroplast thylakoid membrane	-
isotig00421	binding protein	399	10	2.45735e-29	89.6%	8	C:chloroplast envelope; P:response to wounding; P:carotenoid biosynthetic process; P:myo-inositol hexakisphosphate biosynthetic process; F:RNA binding; C:chloroplast stroma; P:photosynthesis; C:chloroplast thylakoid membrane	-
isotig00422	cullin 1	455	10	1.2217e-61	96.3%	26	P:N-terminal protein myristoylation; P:embryonic pattern specification; C:chloroplast envelope; P:jasmonic acid mediated signaling pathway; P:cotyledon development; C:phragmoplast; P:cell division; C:cytosol; P:regulation of cell cycle process; P:ubiquitin-dependent protein catabolic process; P:amino acid import; C:spindle; P:RNA processing; C:cullin-RING ubiquitin ligase complex; P:SCF complex a…	-
isotig00423	cullin-1-like isoform 1	424	10	5.06574e-59	98.6%	12	P:response to jasmonic acid stimulus; P:ubiquitin-dependent protein catabolic process; P:regulation of circadian rhythm; C:condensed nuclear chromosome; P:SCF complex assembly; C:cullin-RING ubiquitin ligase complex; C:chloroplast envelope; F:ubiquitin protein ligase binding; P:response to auxin stimulus; C:spindle; C:phragmoplast; P:embryo development ending in seed dormancy	-
isotig00424	protein xap5 circadian timekeeper	503	10	2.16161e-21	98.3%	6	P:regulation of circadian rhythm; P:response to blue light; P:regulation of photomorphogenesis; P:ethylene mediated signaling pathway; C:nucleus; P:response to red light	-
isotig00425	importin subunit alpha-1	365	10	3.13724e-15	83.6%	11	C:cytosol; F:protein transporter activity; C:cell wall; P:root hair elongation; P:proteasomal protein catabolic process; C:nucleolus; P:protein import into nucleus; P:cytoskeleton organization; F:protein binding; P:gluconeogenesis; C:nuclear envelope	-
isotig00426	ubiquitin carboxyl-terminal hydrolase family protein	533	10	2.51163e-21	95.6%	2	P:ubiquitin-dependent protein catabolic process; F:ubiquitin thiolesterase activity	EC:3.1.2.15
isotig00427	cellulose synthase-like protein d3-like	295	10	9.19641e-37	99.4%	8	P:root hair elongation; P:cellulose biosynthetic process; C:integral to Golgi membrane; P:response to cold; P:cell wall organization; F:cellulose synthase (UDP-forming) activity; C:endoplasmic reticulum; C:plasma membrane	EC:2.4.1.12
isotig00428	---NA---	406	0			0	-
isotig00429	---NA---	376	0			0	-
isotig00430	u1 small nuclear ribonucleoprotein 70 kda	419	10	5.72421e-10	97.6%	10	F:RNA binding; P:production of miRNAs involved in gene silencing by miRNA; P:post-translational protein modification; F:protein binding; F:nucleotide binding; P:mRNA splicing, via spliceosome; P:production of siRNA involved in RNA interference; C:ribonucleoprotein complex; P:positive regulation of transcription, DNA-dependent; C:nucleus	-
isotig00431	u1 small nuclear ribonucleoprotein 70 kda-like	397	10	8.71979e-35	92.8%	3	F:nucleic acid binding; C:ribonucleoprotein complex; F:nucleotide binding	-
isotig00432	rho gtpase activation protein	528	10	1.33442e-19	92.3%	9	F:Rho GTPase activator activity; F:phosphatidylinositol binding; P:maltose metabolic process; P:starch biosynthetic process; C:chloroplast thylakoid membrane; P:signal transduction; P:microtubule nucleation; P:positive regulation of catalytic activity; C:plasma membrane	-
isotig00433	rho gtpase-activating protein	288	10	3.34363e-10	98.8%	5	F:phospholipid binding; C:chloroplast thylakoid membrane; P:positive regulation of GTPase activity; P:signal transduction; F:GTPase activator activity	-
isotig00434	---NA---	499	0			0	-
isotig00435	uncharacterized protein loc100245196	306	10	6.19935e-20	82.5%	0	-
isotig00436	---NA---	461	0			0	-
isotig00437	---NA---	344	0			0	-
isotig00438	poly -binding protein	507	10	1.42934e-18	78.3%	1	F:RNA binding	-
isotig00439	---NA---	280	0			0	-
isotig00440	---NA---	536	0			0	-
isotig00441	splicing cc1-like protein	267	10	1.85683e-08	85.8%	5	F:RNA binding; C:nucleus; C:cytosol; P:mRNA splicing, via spliceosome; F:nucleotide binding	-
isotig00442	at5g49980 k9p8_12	421	5	857.356	85.2%	6	P:response to molecule of bacterial origin; P:stamen development; P:stomatal complex morphogenesis; F:ubiquitin-protein ligase activity; P:auxin mediated signaling pathway; F:inositol hexakisphosphate binding	EC:6.3.2.19
isotig00443	at5g49980 k9p8_12	377	5	846.396	85.2%	6	P:response to molecule of bacterial origin; P:stamen development; P:stomatal complex morphogenesis; F:ubiquitin-protein ligase activity; P:auxin mediated signaling pathway; F:inositol hexakisphosphate binding	EC:6.3.2.19
isotig00444	50s ribosomal protein l12-a	484	10	2.96949e-30	83.5%	9	P:translation; C:nucleoid; P:defense response to bacterium; C:plasmodesma; C:plastid large ribosomal subunit; F:structural constituent of ribosome; C:chloroplast envelope; C:chloroplast thylakoid membrane; C:chloroplast stroma	-
isotig00445	sieve element occlusion b	301	10	23.6165	75.6%	0	-
isotig00446	uncharacterized protein loc100261382	438	10	1.91269e-21	94.0%	3	F:nucleic acid binding; C:ribonucleoprotein complex; F:nucleotide binding	-
isotig00447	31 kda ribonucleoprotein	352	10	0.000789376	95.4%	5	F:nucleic acid binding; P:intracellular protein transport; C:mitochondrial outer membrane; C:ribonucleoprotein complex; F:nucleotide binding	-
isotig00448	protein phosphatase	459	10	1.6627e-35	95.9%	3	F:phosphoprotein phosphatase activity; P:metabolic process; C:plastid	EC:3.1.3.16
isotig00449	protein phosphatase	328	10	5.15248e-12	96.6%	3	F:phosphoprotein phosphatase activity; P:metabolic process; C:plastid	EC:3.1.3.16
isotig00450	cellulose synthase-like protein	397	10	7.90503e-28	68.7%	5	P:cellular process; C:intracellular membrane-bounded organelle; F:transferase activity; C:cytoplasmic part; C:membrane	-
isotig00451	cellulose synthase-like glycosyltransferase family 2 protein	374	10	2.01742e-07	91.4%	8	P:root hair elongation; P:cellulose biosynthetic process; C:integral to Golgi membrane; P:response to cold; P:cell wall organization; F:cellulose synthase (UDP-forming) activity; C:endoplasmic reticulum; C:plasma membrane	EC:2.4.1.12
isotig00452	leucine-rich repeat-containing protein	434	10	298.335	87.8%	1	C:cellular_component
isotig00453	protein binding	324	10	2.97657e-19	88.0%	1	C:cellular_component
isotig00454	ycf2	472	10	1.21735e-64	90.4%	3	F:ATP binding; C:chloroplast stroma; F:nucleoside-triphosphatase activity	EC:3.6.1.15
isotig00455	hypothetical chloroplast rf21	277	10	1.15923e-06	92.8%	3	F:ATP binding; C:chloroplast stroma; F:nucleoside-triphosphatase activity	EC:3.6.1.15
isotig00456	b3 domain-containing transcription repressor val2	444	10	7.93244e-34	74.2%	5	F:sequence-specific DNA binding transcription factor activity; F:DNA binding; C:nucleus; F:zinc ion binding; P:regulation of transcription, DNA-dependent	-
isotig00457	b3 domain-containing transcription factor val3	262	10	0.00403331	85.2%	5	F:sequence-specific DNA binding transcription factor activity; F:DNA binding; C:nucleus; F:zinc ion binding; P:regulation of transcription, DNA-dependent	-
isotig00458	---NA---	359	0			0	-
isotig00459	---NA---	311	0			0	-
isotig00460	uncharacterized mitochondrial protein ymf11-like	336	10	1.1472e-42	96.1%	5	F:RNA-directed DNA polymerase activity; P:RNA-dependent DNA replication; F:RNA binding; P:mRNA processing; C:mitochondrion	EC:2.7.7.49
isotig00461	uncharacterized mitochondrial protein ymf11-like	293	10	5.24632e-16	99.4%	4	F:RNA binding; F:RNA-directed DNA polymerase activity; P:mRNA processing; P:RNA-dependent DNA replication	EC:2.7.7.49
isotig00462	group 4 late embryogenesis-abundant protein	526	10	9.47481e-50	87.8%	1	P:response to desiccation	-
isotig00463	uncharacterized protein	597	10	1.62442e-17	80.1%	1	C:membrane	-
isotig00464	ubiquitin-protein ligase	526	10	1.41582e-45	79.6%	4	P:iron ion homeostasis; P:response to iron ion; P:response to reactive oxygen species; F:ligase activity	-
isotig00465	ribulose -bisphosphate carboxylase oxygenase large subunit	8581	10	0.0	98.9%	7	P:reductive pentose-phosphate cycle; F:ribulose-bisphosphate carboxylase activity; F:monooxygenase activity; P:photorespiration; F:magnesium ion binding; C:chloroplast; P:oxidation-reduction process	EC:4.1.1.39
isotig00466	photosystem ii cp43 chlorophyll apoprotein	4127	10	0.0	97.0%	9	F:metal ion binding; P:photosynthetic electron transport in photosystem II; C:light-harvesting complex; F:electron transporter, transferring electrons within the cyclic electron transport pathway of photosynthesis activity; C:photosystem II; P:protein-chromophore linkage; F:chlorophyll binding; C:integral to membrane; C:chloroplast thylakoid membrane	-
isotig00467	maturase k	4093	10	0.0	94.1%	5	P:RNA splicing; F:RNA binding; P:mRNA processing; C:chloroplast; P:tRNA processing	-
isotig00468	rna polymerase beta subunit	3885	10	0.0	98.3%	5	F:DNA-directed RNA polymerase activity; P:transcription, DNA-dependent; F:DNA binding; F:ribonucleoside binding; C:chloroplast	EC:2.7.7.6
isotig00469	cytochrome c oxidase subunit 1	2785	10	0.0	99.1%	11	F:copper ion binding; P:transport; F:cytochrome-c oxidase activity; C:mitochondrial respiratory chain complex IV; C:integral to membrane; F:electron carrier activity; P:respiratory electron transport chain; P:aerobic respiration; F:heme binding; P:oxidative phosphorylation; C:plasma membrane	EC:1.9.3.1
isotig00470	cytochrome c oxidase subunit 3	2633	10	1.57443e-124	98.1%	5	P:mitochondrial electron transport, cytochrome c to oxygen; P:aerobic electron transport chain; C:integral to membrane; C:mitochondrion; F:cytochrome-c oxidase activity	EC:1.9.3.1
isotig00471	methionine synthase	2496	10	0.0	94.9%	15	C:cytosol; F:copper ion binding; P:methionine biosynthetic process; F:methionine synthase activity; F:zinc ion binding; C:peroxisome; P:response to salt stress; C:chloroplast envelope; F:5-methyltetrahydropteroyltriglutamate-homocysteine S-methyltransferase activity; P:methylation; C:chloroplast stroma; P:response to zinc ion; P:response to cadmium ion; C:plasma membrane; C:apoplast	EC:2.1.1.13; EC:2.1.1.14
isotig00472	atp synthase cf1 beta subunit	2481	10	0.0	97.1%	8	C:proton-transporting ATP synthase complex, catalytic core F(1); P:plasma membrane ATP synthesis coupled proton transport; F:hydrogen-exporting ATPase activity, phosphorylative mechanism; F:proton-transporting ATP synthase activity, rotational mechanism; F:ATP binding; F:proton-transporting ATPase activity, rotational mechanism; C:chloroplast thylakoid membrane; P:ATP hydrolysis coupled proton tr…	EC:3.6.3.6
isotig00473	hypothetical chloroplast rf2	2445	10	0.0	96.1%	3	F:ATP binding; C:chloroplast stroma; F:nucleoside-triphosphatase activity	EC:3.6.1.15
isotig00474	chloroplast transketolase	2407	10	0.0	95.1%	2	F:transketolase activity; P:metabolic process	EC:2.2.1.1
isotig00475	atpase subunit 6	2365	10	1.01012e-102	74.3%	5	C:mitochondrial proton-transporting ATP synthase complex; F:proton-transporting ATP synthase activity, rotational mechanism; P:cellular respiration; C:proton-transporting ATP synthase complex, coupling factor F(o); P:mitochondrial ATP synthesis coupled proton transport	-
isotig00476	endoplasmin-like protein	2312	10	0.0	94.8%	29	C:vacuolar membrane; P:N-terminal protein myristoylation; P:gluconeogenesis; P:regulation of meristem structural organization; P:protein folding; P:response to hydrogen peroxide; P:water transport; P:response to water deprivation; C:endoplasmic reticulum lumen; P:protein secretion; P:regulation of meristem growth; P:response to salt stress; C:chloroplast; C:Golgi apparatus; P:hyperosmotic respons…	-
isotig00477	nadh-plastoquinone oxidoreductase subunit partial	2246	10	0.0	92.4%	6	F:quinone binding; F:NADH dehydrogenase (ubiquinone) activity; P:transport; C:integral to membrane; P:ATP synthesis coupled electron transport; C:chloroplast thylakoid membrane	EC:1.6.5.3
isotig00018	transitional endoplasmic reticulum	1726	10	0.0	99.0%	14	C:cell wall; C:nucleolus; F:identical protein binding; P:cell division; F:ATP binding; F:microtubule-severing ATPase activity; P:pollen tube growth; C:spindle; C:nuclear envelope; P:pollen germination; P:response to cadmium ion; C:cytosolic ribosome; C:phragmoplast; C:plasma membrane	EC:3.6.4.3
isotig00019	cell division cycle protein 48 homolog	1507	10	0.0	99.0%	13	C:cell wall; P:cell cycle; F:identical protein binding; P:cell division; F:ATP binding; F:microtubule-severing ATPase activity; P:pollen tube growth; C:spindle; C:nuclear envelope; P:pollen germination; C:cytosolic ribosome; C:phragmoplast; C:plasma membrane	EC:3.6.4.3
isotig00020	cell division cycle protein 48 homolog	1507	10	0.0	99.0%	14	C:cell wall; C:nucleolus; F:identical protein binding; P:cell division; F:ATP binding; F:microtubule-severing ATPase activity; P:pollen tube growth; C:spindle; C:nuclear envelope; P:pollen germination; P:response to cadmium ion; C:cytosolic ribosome; C:phragmoplast; C:plasma membrane	EC:3.6.4.3
isotig00021	glycine dehydrogenase	3484	10	0.0	95.2%	10	P:oxidation-reduction process; F:glycine dehydrogenase (decarboxylating) activity; C:mitochondrion; C:chloroplast envelope; P:glycine catabolic process; F:ATP binding; F:2-alkenal reductase [NAD(P)] activity; P:response to cadmium ion; F:pyridoxal phosphate binding; C:apoplast	EC:1.4.4.2; EC:1.3.1.74
isotig00022	glycine dehydrogenase	3484	10	0.0	95.0%	10	P:oxidation-reduction process; F:glycine dehydrogenase (decarboxylating) activity; C:mitochondrion; C:chloroplast envelope; P:glycine catabolic process; F:ATP binding; F:2-alkenal reductase [NAD(P)] activity; P:response to cadmium ion; F:pyridoxal phosphate binding; C:apoplast	EC:1.4.4.2; EC:1.3.1.74
isotig00023	glycine dehydrogenase	3484	10	0.0	95.2%	10	P:oxidation-reduction process; F:glycine dehydrogenase (decarboxylating) activity; C:mitochondrion; C:chloroplast envelope; P:glycine catabolic process; F:ATP binding; F:2-alkenal reductase [NAD(P)] activity; P:response to cadmium ion; F:pyridoxal phosphate binding; C:apoplast	EC:1.4.4.2; EC:1.3.1.74
isotig00024	glycine dehydrogenase	3484	10	0.0	95.0%	10	P:oxidation-reduction process; F:glycine dehydrogenase (decarboxylating) activity; C:mitochondrion; C:chloroplast envelope; P:glycine catabolic process; F:ATP binding; F:2-alkenal reductase [NAD(P)] activity; P:response to cadmium ion; F:pyridoxal phosphate binding; C:apoplast	EC:1.4.4.2; EC:1.3.1.74
isotig00025	glycine dehydrogenase	3393	10	0.0	95.2%	10	P:oxidation-reduction process; F:glycine dehydrogenase (decarboxylating) activity; C:mitochondrion; C:chloroplast envelope; P:glycine catabolic process; F:ATP binding; F:2-alkenal reductase [NAD(P)] activity; P:response to cadmium ion; F:pyridoxal phosphate binding; C:apoplast	EC:1.4.4.2; EC:1.3.1.74
isotig00026	glycine dehydrogenase	3393	10	0.0	95.0%	10	P:oxidation-reduction process; F:glycine dehydrogenase (decarboxylating) activity; C:mitochondrion; C:chloroplast envelope; P:glycine catabolic process; F:ATP binding; F:2-alkenal reductase [NAD(P)] activity; P:response to cadmium ion; F:pyridoxal phosphate binding; C:apoplast	EC:1.4.4.2; EC:1.3.1.74
isotig00027	glycine dehydrogenase	3393	10	0.0	95.2%	10	P:oxidation-reduction process; F:glycine dehydrogenase (decarboxylating) activity; C:mitochondrion; C:chloroplast envelope; P:glycine catabolic process; F:ATP binding; F:2-alkenal reductase [NAD(P)] activity; P:response to cadmium ion; F:pyridoxal phosphate binding; C:apoplast	EC:1.4.4.2; EC:1.3.1.74
isotig00478	atp-dependent zinc metalloprotease ftsh chloroplastic-like	2193	10	0.0	96.1%	13	C:thylakoid lumen; F:zinc ion binding; C:integral to membrane; C:chloroplast envelope; P:cell division; P:thylakoid membrane organization; F:metalloendopeptidase activity; P:proteolysis; F:ATP binding; F:microtubule-severing ATPase activity; C:chloroplast thylakoid membrane; P:photoinhibition; P:protein catabolic process	EC:3.4.24.0; EC:3.6.4.3
isotig00479	heat shock protein 70	2204	10	0.0	98.9%	16	P:response to virus; C:cell wall; P:oxidation-reduction process; C:nucleolus; P:response to cold; C:chloroplast envelope; P:response to heat; P:response to bacterium; F:ATP binding; F:2-alkenal reductase [NAD(P)] activity; C:vacuole; P:response to cadmium ion; C:cytosolic ribosome; P:response to karrikin; C:plasma membrane; C:apoplast	EC:1.3.1.74
isotig00480	apocytochrome b	2138	10	0.0	95.7%	7	F:metal ion binding; F:oxidoreductase activity; C:respiratory chain; F:electron carrier activity; C:integral to membrane; P:respiratory electron transport chain; C:mitochondrion	-
isotig00481	phenylalanine ammonia-lyase	2076	10	0.0	91.8%	11	C:cytoplasm; P:salicylic acid catabolic process; F:phenylalanine ammonia-lyase activity; P:pollen development; P:response to oxidative stress; P:response to UV-B; P:biosynthetic process; P:drought recovery; P:L-phenylalanine catabolic process; P:lignin catabolic process; P:response to karrikin	EC:4.3.1.5
isotig00482	ribosomal protein s10	2089	6	1.06242e-104	8.76667e+13	14	F:cytochrome-c oxidase activity; F:proton-transporting ATPase activity, rotational mechanism; F:proton-transporting ATP synthase activity, rotational mechanism; F:heme binding; P:ATP hydrolysis coupled proton transport; F:electron carrier activity; C:integral to membrane; C:chloroplast; C:proton-transporting ATP synthase complex, catalytic core F(1); P:ATP synthesis coupled proton transport; F:co…	EC:1.9.3.1
isotig00483	subtilisin-like protease	2022	10	4.73268e-111	75.0%	8	F:identical protein binding; C:plant-type cell wall; F:serine-type endopeptidase activity; P:mucilage metabolic process involved in seed coat development; P:mucilage extrusion from seed coat; P:proteolysis; P:negative regulation of catalytic activity; C:apoplast	EC:3.4.21.0
isotig00484	nadp-dependent malic enzyme	2043	10	0.0	90.9%	26	C:vacuolar membrane; P:cytoskeleton organization; P:gluconeogenesis; C:apoplast; F:zinc ion binding; F:NAD binding; P:protein homotetramerization; P:regulation of plant-type hypersensitive response; P:proteasomal protein catabolic process; P:protein targeting to membrane; C:chloroplast; C:cell wall; P:root hair elongation; F:cobalt ion binding; C:cytosol; P:malate metabolic process; F:malate dehy…	EC:1.1.1.38; EC:1.1.1.40; EC:1.6.1.0
isotig00485	autoinhibited h+ atpase	2028	10	0.0	92.4%	8	C:integral to membrane; F:metal ion binding; P:ATP catabolic process; F:ATPase activity, coupled to transmembrane movement of ions, phosphorylative mechanism; P:ATP biosynthetic process; F:ATP binding; P:cation transport; C:plasma membrane	-
isotig00486	nadh dehydrogenase subunit 5	2028	10	0.0	98.4%	5	C:mitochondrial inner membrane; C:respiratory chain; F:NADH dehydrogenase (ubiquinone) activity; C:integral to membrane; P:ATP synthesis coupled electron transport	EC:1.6.5.3
isotig00487	photosystem ii cytochrome b559 alpha subunit	1991	10	1.90904e-63	92.7%	10	P:photosynthetic electron transport chain; C:plasma membrane-derived thylakoid photosystem II; C:integral to membrane; P:DNA-dependent transcription, elongation; P:photosynthesis, light harvesting in photosystem II; F:electron carrier activity; C:photosystem II reaction center; C:chloroplast thylakoid membrane; F:heme binding; C:oxygen evolving complex	-
isotig00488	ferredoxin-dependent glutamate synthase 1	1977	10	0.0	88.4%	30	P:response to fructose stimulus; P:regulation of proton transport; P:stomatal complex morphogenesis; P:photosynthesis, light reaction; P:photorespiration; P:response to far red light; C:chloroplast envelope; C:apoplast; P:response to sucrose stimulus; P:carotenoid biosynthetic process; F:protein binding; P:salicylic acid biosynthetic process; P:water transport; C:membrane; P:response to red light…	EC:1.4.7.1
isotig00489	nadh-plastoquinone oxidoreductase subunit k	1930	10	5.64607e-136	89.9%	8	F:quinone binding; F:NADH dehydrogenase (ubiquinone) activity; F:iron ion binding; P:transport; F:4 iron, 4 sulfur cluster binding; P:photosynthesis, light reaction; C:chloroplast thylakoid membrane; P:oxidation-reduction process	EC:1.6.5.3
isotig00490	#NAME?	1926	10	0.0	75.9%	3	F:sesquiterpene synthase activity; F:magnesium ion binding; P:metabolic process	-
isotig00491	ketol-acid reductoisomerase	1879	10	0.0	96.0%	18	C:cytosol; F:copper ion binding; C:cell wall; P:oxidation-reduction process; P:purine nucleotide biosynthetic process; C:mitochondrion; P:response to salt stress; C:chloroplast envelope; P:branched-chain amino acid biosynthetic process; F:ketol-acid reductoisomerase activity; F:nucleotide binding; P:glycolysis; C:chloroplast stroma; F:isomerase activity; P:gluconeogenesis; F:coenzyme binding; P:r…	EC:1.1.1.86
isotig00492	heat shock	1876	10	0.0	95.1%	15	P:oxidation-reduction process; C:mitochondrion; P:protein folding; P:response to cold; C:chloroplast envelope; P:response to heat; C:thylakoid; F:ATP binding; C:chloroplast stroma; F:2-alkenal reductase [NAD(P)] activity; F:unfolded protein binding; P:protein targeting to chloroplast; P:response to cadmium ion; C:nucleus; C:apoplast	EC:1.3.1.74
isotig00493	atp-citrate lyase b-1	1873	10	0.0	97.0%	10	P:acetyl-CoA biosynthetic process; P:cellular carbohydrate metabolic process; C:citrate lyase complex; C:plasma membrane; F:ATP citrate synthase activity; F:succinate-CoA ligase (ADP-forming) activity; F:cofactor binding; F:lyase activity; C:cytosol; F:nucleotide binding	EC:2.3.3.8; EC:6.2.1.5
isotig00494	gamma-glutamyl transpeptidase 1	1857	10	0.0	75.0%	28	P:response to fructose stimulus; P:negative regulation of defense response; P:photorespiration; P:response to wounding; P:hydrogen peroxide catabolic process; C:apoplast; F:L-alanine:2-oxoglutarate aminotransferase activity; P:water transport; P:systemic acquired resistance, salicylic acid mediated signaling pathway; P:myo-inositol hexakisphosphate biosynthetic process; C:plant-type cell wall; F:…	EC:2.6.1.2; EC:2.3.2.2; EC:2.6.1.44; EC:2.6.1.4; EC:2.3.2.15
isotig00495	atpase subunit 1	1845	10	0.0	97.5%	7	C:proton-transporting ATP synthase complex, catalytic core F(1); F:proton-transporting ATP synthase activity, rotational mechanism; C:mitochondrial inner membrane; P:ATP synthesis coupled proton transport; F:ATP binding; F:proton-transporting ATPase activity, rotational mechanism; P:ATP hydrolysis coupled proton transport	-
isotig00496	heat shock protein 70	1819	10	0.0	96.3%	14	P:response to virus; C:cell wall; C:nucleolus; P:response to cold; C:chloroplast envelope; P:response to heat; P:response to bacterium; F:ATP binding; C:vacuole; P:response to cadmium ion; C:cytosolic ribosome; P:response to karrikin; C:plasma membrane; C:apoplast	-
isotig00497	(-)-germacrene d synthase	1789	10	0.0	75.1%	3	F:metal ion binding; P:metabolic process; F:terpene synthase activity	-
isotig00498	heat shock	1785	10	0.0	98.1%	14	C:cell wall; P:oxidation-reduction process; P:response to endoplasmic reticulum stress; P:ER-associated protein catabolic process; C:nucleolus; P:polar nucleus fusion; P:response to heat; F:ATP binding; C:endoplasmic reticulum lumen; F:2-alkenal reductase [NAD(P)] activity; C:chloroplast; C:vacuole; P:response to cadmium ion; C:plasma membrane	EC:1.3.1.74
isotig00499	ein3-binding f-box protein 3	1753	10	0.0	84.8%	3	C:SCF ubiquitin ligase complex; C:nucleus; P:response to ethylene stimulus	-
isotig00500	sucrose synthase sus1	1721	10	0.0	95.8%	3	F:sucrose synthase activity; P:biosynthetic process; P:sucrose metabolic process	EC:2.4.1.13
isotig00501	arginine decarboxylase	1715	10	0.0	87.0%	12	P:response to jasmonic acid stimulus; P:response to wounding; P:response to cold; P:response to oxidative stress; P:arginine catabolic process; F:arginine decarboxylase activity; P:spermidine biosynthetic process; P:response to abscisic acid stimulus; P:putrescine biosynthetic process; P:response to salt stress; P:seed development; P:response to karrikin	EC:4.1.1.19
isotig00502	glycerophosphoryl diester phosphodiesterase 3	1699	10	2.42116e-107	71.4%	17	P:trichome differentiation; P:root hair elongation; P:glycerol metabolic process; P:cell tip growth; P:guard cell morphogenesis; C:plant-type cell wall; F:glycerophosphodiester phosphodiesterase activity; P:cell wall pectin metabolic process; P:carbohydrate biosynthetic process; C:anchored to plasma membrane; F:kinase activity; C:chloroplast; P:plant-type cell wall biogenesis; P:cellular phosphat…	EC:3.1.4.46
isotig00503	trans-cinnamate 4-hydroxylase	1657	10	0.0	97.4%	13	P:pollen development; C:plant-type cell wall; F:trans-cinnamate 4-monooxygenase activity; P:response to wounding; C:plasma membrane; F:electron carrier activity; F:heme binding; P:lignin metabolic process; P:growth; C:endoplasmic reticulum; P:response to light stimulus; P:oxidation-reduction process; P:response to karrikin	EC:1.14.13.11
isotig00504	clathrin heavy chain 1-like	1675	10	0.0	97.6%	7	P:vesicle-mediated transport; C:clathrin coat of coated pit; C:clathrin coat of trans-Golgi network vesicle; P:intracellular protein transport; F:structural molecule activity; C:chloroplast; C:vacuole	-
isotig00505	ribosomal protein s12	1673	10	2.46489e-53	98.5%	7	C:mitochondrial small ribosomal subunit; F:structural constituent of ribosome; F:NADH dehydrogenase (ubiquinone) activity; C:chloroplast; P:translation; F:rRNA binding; P:oxidation-reduction process	EC:1.6.5.3
isotig00506	precursor of protein cell division protease ftsh-like protein	1657	10	0.0	97.4%	16	P:pentose-phosphate shunt; F:ATP-dependent peptidase activity; C:thylakoid lumen; P:cell division; C:integral to membrane; P:photosynthetic electron transport in photosystem I; F:metal ion binding; F:metalloendopeptidase activity; P:PSII associated light-harvesting complex II catabolic process; P:glucosinolate biosynthetic process; C:chloroplast membrane; P:proteolysis; C:chloroplast thylakoid me…	EC:3.4.24.0
isotig00507	catalase	1648	10	0.0	97.4%	24	P:photoperiodism; C:cell wall; P:hydrogen peroxide catabolic process; P:oxidation-reduction process; C:peroxisome; C:mitochondrion; P:cell death; F:cobalt ion binding; P:response to cold; P:cell redox homeostasis; F:catalase activity; C:chloroplast envelope; P:response to abscisic acid stimulus; C:chloroplast stroma; F:heme binding; P:cellular response to sulfate starvation; C:vacuole; P:cellular…	EC:1.11.1.6
isotig00508	ca2+ antiporter cation exchanger	1621	10	1.89151e-151	86.2%	16	P:sodium ion transport; P:cellular manganese ion homeostasis; P:calcium ion transmembrane transport; P:root development; P:cellular zinc ion homeostasis; P:response to salt stress; C:integral to membrane; P:cellular calcium ion homeostasis; C:plant-type vacuole membrane; P:phosphorus metabolic process; F:calcium:hydrogen antiporter activity; P:response to auxin stimulus; P:cold acclimation; P:lit…	-
isotig00509	nadp-dependent glyceraldehyde-3-phosphate dehydrogenase-like	1606	10	0.0	96.7%	3	P:oxidation-reduction process; C:cytoplasm; F:glyceraldehyde-3-phosphate dehydrogenase (NADP+) (non-phosphorylating) activity	EC:1.2.1.9
isotig00510	catalase	1618	10	0.0	89.8%	24	P:photoperiodism; C:cell wall; P:hydrogen peroxide catabolic process; P:oxidation-reduction process; C:peroxisome; C:mitochondrion; P:cell death; F:cobalt ion binding; P:response to cold; P:cell redox homeostasis; F:catalase activity; C:chloroplast envelope; P:response to abscisic acid stimulus; C:chloroplast stroma; F:heme binding; P:cellular response to sulfate starvation; C:vacuole; P:cellular…	EC:1.11.1.6
isotig00511	2-phospho-d-glycerate hydrolase	1584	10	0.0	94.0%	17	F:copper ion binding; F:acetyl-CoA C-acyltransferase activity; P:response to salt stress; P:response to light stimulus; P:response to cold; C:phosphopyruvate hydratase complex; P:response to abscisic acid stimulus; F:magnesium ion binding; P:glycolysis; C:mitochondrial envelope; C:chloroplast; P:response to cadmium ion; F:hydrolase activity; F:phosphopyruvate hydratase activity; C:nucleus; C:plas…	EC:2.3.1.16; EC:4.2.1.11
isotig00512	mitochondrial serine hydroxymethyltransferase	1587	10	0.0	96.3%	8	F:pyridoxal phosphate binding; P:L-serine metabolic process; P:tetrahydrofolate interconversion; P:methylation; F:methyltransferase activity; F:glycine hydroxymethyltransferase activity; P:glycine metabolic process; C:mitochondrion	EC:2.1.1.0; EC:2.1.2.1
isotig00513	omega-3 fatty acid chloroplastic	1583	10	0.0	93.4%	6	P:fatty acid biosynthetic process; C:chloroplast envelope; F:omega-3 fatty acid desaturase activity; F:oxidoreductase activity, acting on paired donors, with oxidation of a pair of donors resulting in the reduction of molecular oxygen to two molecules of water; P:response to cold; P:oxidation-reduction process	EC:1.14.19.0
isotig00514	hydroxymethylglutaryl- reductase	1572	10	0.0	90.8%	20	P:response to wounding; P:coenzyme A metabolic process; F:protein binding; P:sterol biosynthetic process; P:coumarin biosynthetic process; F:NADP binding; P:calcium ion transport; P:response to salt stress; P:vacuole organization; C:integral to membrane; C:endoplasmic reticulum membrane; F:hydroxymethylglutaryl-CoA reductase (NADPH) activity; C:mitochondrial membrane; C:peroxisome; P:Golgi organi…	EC:1.1.1.34; EC:1.1.1.88
isotig00515	hydroperoxide lyase	1570	10	1.55609e-135	84.3%	8	C:chloroplast envelope; F:hydroperoxide dehydratase activity; P:response to wounding; F:electron carrier activity; F:monooxygenase activity; F:heme binding; F:oxidoreductase activity, acting on paired donors, with incorporation or reduction of molecular oxygen; P:oxidation-reduction process	EC:4.2.1.92
isotig00516	low quality protein: s-adenosylmethionine decarboxylase proenzyme-like	1557	10	2.49904e-161	85.3%	4	P:spermine biosynthetic process; F:adenosylmethionine decarboxylase activity; P:spermidine biosynthetic process; F:arginine decarboxylase activity	EC:4.1.1.50; EC:4.1.1.19
isotig00517	serine hydroxymethyltransferase	1564	10	0.0	93.0%	13	P:pollen development; F:pyridoxal phosphate binding; P:L-serine metabolic process; P:response to cadmium ion; C:plasmodesma; P:polar nucleus fusion; C:plasma membrane; P:one-carbon metabolic process; P:methylation; C:cytosol; F:methyltransferase activity; F:glycine hydroxymethyltransferase activity; P:glycine metabolic process	EC:2.1.1.0; EC:2.1.2.1
isotig00518	eukaryotic translation elongation	1566	10	0.0	97.9%	11	C:cytosol; F:copper ion binding; F:translation elongation factor activity; C:nucleolus; P:response to cold; P:translational elongation; P:GTP catabolic process; F:GTPase activity; C:chloroplast; F:GTP binding; C:plasma membrane	-
isotig00519	atp binding	1569	10	3.31327e-153	73.1%	2	F:transferase activity, transferring glycosyl groups; F:transferase activity, transferring phosphorus-containing groups	-
isotig00520	glutamate synthase	1566	10	0.0	91.3%	12	P:oxidation-reduction process; C:amyloplast; P:glutamine metabolic process; F:3 iron, 4 sulfur cluster binding; F:flavin adenine dinucleotide binding; P:nitrogen compound metabolic process; C:chloroplast stroma; P:L-glutamate biosynthetic process; P:response to cadmium ion; F:FMN binding; F:iron ion binding; F:glutamate synthase (NADH) activity	EC:1.4.1.14
isotig00521	alpha tubulin 1	1539	10	0.0	100.0%	8	C:microtubule; P:protein polymerization; P:GTP catabolic process; P:microtubule-based movement; F:GTPase activity; F:structural molecule activity; C:cytoplasm; F:GTP binding	-
isotig00522	clathrin heavy chain 1-like	1535	10	0.0	98.3%	7	P:vesicle-mediated transport; C:clathrin coat of coated pit; C:clathrin coat of trans-Golgi network vesicle; C:vacuolar membrane; P:intracellular protein transport; F:structural molecule activity; C:chloroplast	-
isotig00523	glutamate decarboxylase 5	1537	10	0.0	90.3%	5	F:pyridoxal phosphate binding; F:calmodulin binding; C:plasmodesma; P:glutamate metabolic process; F:glutamate decarboxylase activity	EC:4.1.1.15
isotig00524	alpha tubulin 1	1530	10	0.0	99.8%	8	C:microtubule; P:protein polymerization; P:GTP catabolic process; P:microtubule-based movement; F:GTPase activity; F:structural molecule activity; C:cytoplasm; F:GTP binding	-
isotig00525	rna polymerase beta partial	1524	10	0.0	93.7%	4	F:DNA-directed RNA polymerase activity; P:transcription, DNA-dependent; F:DNA binding; C:chloroplast	EC:2.7.7.6
isotig00526	chaperone protein	1522	10	3.61133e-165	95.2%	11	C:cell wall; F:heat shock protein binding; P:protein folding; C:nucleolus; P:response to salt stress; P:regulation of ATPase activity; F:metal ion binding; P:response to heat; F:ATP binding; F:unfolded protein binding; C:plasma membrane	-
isotig00527	glyceraldehyde-3-phosphate dehydrogenase b subunit	1520	10	0.0	94.6%	17	F:NAD binding; P:reductive pentose-phosphate cycle; P:oxidation-reduction process; P:response to sucrose stimulus; F:glyceraldehyde-3-phosphate dehydrogenase (NADP+) (phosphorylating) activity; C:photosystem I; C:integral to membrane; P:response to light stimulus; P:response to cold; C:chloroplast envelope; C:chloroplast thylakoid membrane; C:chloroplast stroma; F:NADP binding; P:glucose metaboli…	EC:1.2.1.13
isotig00528	phosphoglycerate chloroplastic-like	1511	10	0.0	95.1%	14	C:chloroplast envelope; P:response to cold; F:phosphoglycerate kinase activity; P:response to cadmium ion; P:phosphorylation; C:cell wall; C:stromule; C:chloroplast stroma; P:glycolysis; C:thylakoid; C:membrane; C:nucleus; C:apoplast; C:mitochondrion	EC:2.7.2.3
isotig00529	atpase subunit 4	1509	10	3.9254e-71	92.8%	3	F:hydrogen ion transmembrane transporter activity; C:mitochondrial proton-transporting ATP synthase complex, coupling factor F(o); P:ATP synthesis coupled proton transport	-
isotig00530	4-hydroxy-3-methylbut-2-en-1-yl diphosphate synthase	1474	10	0.0	96.2%	11	P:oxidation-reduction process; P:systemic acquired resistance, salicylic acid mediated signaling pathway; P:phosphoenolpyruvate-dependent sugar phosphotransferase system; C:chloroplast envelope; P:response to bacterium; F:4 iron, 4 sulfur cluster binding; P:terpenoid biosynthetic process; C:chloroplast stroma; F:4-hydroxy-3-methylbut-2-en-1-yl diphosphate synthase activity; F:sugar:hydrogen sympo…	EC:1.17.7.1
isotig00531	heat shock protein 83-like	1469	10	0.0	96.9%	5	P:protein folding; C:cytoplasm; F:unfolded protein binding; F:ATP binding; P:response to stress	-
isotig00532	branched-chain-amino-acid aminotransferase 3	1455	10	1.64685e-159	84.5%	8	P:toxin catabolic process; F:L-leucine transaminase activity; P:branched-chain amino acid metabolic process; F:L-valine transaminase activity; P:second-messenger-mediated signaling; C:chloroplast stroma; F:L-isoleucine transaminase activity; C:cytosol	EC:2.6.1.42
isotig00533	protein	1432	10	0.0	88.9%	3	F:structural constituent of cell wall; C:plasmodesma; C:plant-type cell wall	-
isotig00534	elongation factor chloroplastic-like	1442	10	0.0	98.2%	11	F:translation elongation factor activity; C:nucleoid; C:nucleolus; C:chloroplast envelope; P:translational elongation; P:GTP catabolic process; C:chloroplast thylakoid membrane; C:chloroplast stroma; F:GTPase activity; F:GTP binding; C:apoplast	-
isotig00535	ribosomal protein s3	1439	10	0.0	91.5%	6	F:structural constituent of ribosome; C:small ribosomal subunit; C:chloroplast; P:translation; F:rRNA binding; C:mitochondrion	-
isotig00536	pre-mrna-processing-splicing factor	1432	10	0.0	99.9%	5	C:spliceosomal complex; C:cytoplasmic membrane-bounded vesicle; C:chloroplast; C:membrane; P:mRNA splicing, via spliceosome	-
isotig00537	adenylyl-sulfate reductase	1420	10	0.0	89.6%	8	F:adenylyl-sulfate reductase (glutathione) activity; P:cell redox homeostasis; P:cysteine biosynthetic process; C:chloroplast stroma; F:adenylyl-sulfate reductase activity; P:sulfate assimilation; P:sulfate reduction; F:phosphoadenylyl-sulfate reductase (thioredoxin) activity	EC:1.8.4.9; EC:1.8.99.2; EC:1.8.4.8
isotig00538	beta-glucosidase d4	1399	10	9.09574e-132	66.1%	2	F:hydrolase activity, hydrolyzing O-glycosyl compounds; P:carbohydrate catabolic process	EC:3.2.1.0
isotig00539	linoleate 13s-lipoxygenase 3- chloroplastic-like	1406	10	0.0	93.9%	6	P:oxylipin biosynthetic process; F:iron ion binding; C:chloroplast stroma; C:chloroplast thylakoid; F:linoleate 13S-lipoxygenase activity; P:oxidation-reduction process	EC:1.13.11.12
isotig00540	udp-d-glucuronate 4-epimerase 1	1409	10	0.0	93.9%	7	F:UDP-glucuronate 5'-epimerase activity; P:carbohydrate metabolic process; C:Golgi apparatus; P:nucleotide-sugar metabolic process; F:coenzyme binding; F:UDP-glucuronate 4-epimerase activity; F:nucleotide binding	EC:5.1.3.12; EC:5.1.3.6
isotig00541	cellulose synthase catalytic subunit	1404	10	0.0	98.0%	5	F:cellulose synthase (UDP-forming) activity; P:cellulose biosynthetic process; C:integral to membrane; P:cell wall organization; F:zinc ion binding	EC:2.4.1.12
isotig00542	phospholipase d alpha	1387	10	0.0	95.6%	15	P:positive regulation of abscisic acid mediated signaling pathway; P:seed germination; F:calcium ion binding; C:mitochondrion; P:lipid catabolic process; P:phosphatidylcholine metabolic process; C:chloroplast envelope; C:clathrin-coated vesicle; P:regulation of stomatal movement; F:phosphatidylinositol-4,5-bisphosphate binding; F:phospholipase D activity; F:NAPE-specific phospholipase D activity;…	EC:3.1.4.4
isotig00543	protein phosphatase 2c 16	1385	10	4.16648e-116	69.1%	4	F:protein serine/threonine phosphatase activity; P:response to symbiotic fungus; F:protein binding; P:regulation of seed germination	-
isotig00544	endomembrane protein 70	1383	10	2.45867e-149	90.3%	9	P:membrane fusion; C:plant-type cell wall; F:SNAP receptor activity; C:Golgi apparatus; C:plasmodesma; C:plasma membrane; P:transport; C:vacuolar membrane; C:integral to membrane	-
isotig00545	cysteine proteinase aalp	1383	10	4.93113e-166	89.5%	16	C:cytosol; P:hydrogen peroxide catabolic process; F:cysteine-type peptidase activity; P:response to fructose stimulus; P:response to salt stress; P:response to temperature stimulus; P:proteolysis; P:hyperosmotic response; P:calcium ion transport; P:water transport; P:aging; P:Golgi organization; P:glycolysis; P:response to ethylene stimulus; C:vacuole; P:response to cadmium ion	-
isotig00546	vacuolar proton	1370	10	0.0	83.7%	19	P:cellular response to salt stress; C:plant-type vacuole membrane; C:chloroplast envelope; P:calcium ion transport; P:ATP hydrolysis coupled proton transport; P:cell morphogenesis; P:vacuole organization; F:hydrogen ion transmembrane transporter activity; C:vacuolar proton-transporting V-type ATPase, V0 domain; C:Golgi apparatus; P:cellular response to nutrient levels; F:hydrogen-translocating py…	EC:3.6.1.3
isotig00547	ru large subunit-binding protein subunit chloroplastic-like	1355	10	0.0	97.6%	11	P:embryo development; C:chloroplast envelope; C:cytosolic ribosome; P:chloroplast organization; F:ATP binding; C:chloroplast stroma; P:protein refolding; C:thylakoid; C:membrane; C:apoplast; C:mitochondrion	-
isotig00548	60s ribosomal protein l4 l1	1364	10	5.24914e-153	94.4%	8	C:nucleolus; C:vacuole; F:structural constituent of ribosome; C:plasma membrane; C:cell wall; C:cytosolic large ribosomal subunit; C:chloroplast; P:translation	-
isotig00549	geranylgeranyl diphosphate chloroplastic-like	1365	10	0.0	91.1%	8	C:chloroplast envelope; P:chlorophyll biosynthetic process; F:oxidoreductase activity, acting on the CH-CH group of donors, NAD or NADP as acceptor; F:geranylgeranyl reductase activity; P:photosynthesis; C:chloroplast thylakoid membrane; P:oxidation-reduction process; F:nucleotide binding	EC:1.3.1.0
isotig00550	transcription factor lhy	1342	10	2.65165e-106	78.2%	2	P:regulation of circadian rhythm; F:DNA binding	-
isotig00551	cbl-interacting protein kinase 12	1353	10	1.26467e-150	89.4%	11	P:protein phosphorylation; P:response to mannitol stimulus; F:protein serine/threonine kinase activity; P:response to salt stress; P:response to cold; P:response to wounding; P:regulation of potassium ion transport; F:ATP binding; F:protein tyrosine kinase activity; P:cellular response to potassium ion starvation; P:signal transduction	EC:2.7.11.0; EC:2.7.10.0
isotig00552	plasma membrane h+-atpase	1345	10	0.0	97.1%	8	F:hydrogen-exporting ATPase activity, phosphorylative mechanism; C:integral to membrane; F:metal ion binding; P:ATP catabolic process; P:ATP biosynthetic process; F:ATP binding; P:proton transport; C:plasma membrane	EC:3.6.3.6
isotig00553	serine threonine protein	1337	10	0.0	85.1%	7	P:phosphorelay signal transduction system; P:protein phosphorylation; P:regulation of transcription, DNA-dependent; P:signal transduction by phosphorylation; F:ATP binding; F:protein kinase C activity; F:phosphorelay sensor kinase activity	EC:2.7.11.13
isotig00554	glutamine synthetase	1355	10	0.0	96.7%	12	C:mitochondrion; P:response to salt stress; C:chloroplast envelope; P:glutamine biosynthetic process; F:ATP binding; F:glutamate-ammonia ligase activity; C:chloroplast thylakoid membrane; P:nitrogen compound metabolic process; C:chloroplast stroma; P:response to cadmium ion; C:cytosolic ribosome; C:apoplast	EC:6.3.1.2
isotig00555	beta-tubulin 3	1346	10	1.03056e-144	84.0%	8	C:microtubule; P:protein polymerization; P:GTP catabolic process; P:microtubule-based movement; F:GTPase activity; F:structural molecule activity; C:cytoplasm; F:GTP binding	-
isotig00556	cellulose synthase	1345	10	0.0	94.9%	10	P:primary cell wall biogenesis; F:zinc ion binding; C:integral to membrane; P:cellulose biosynthetic process; P:cell wall organization; P:hyperosmotic salinity response; F:cellulose synthase (UDP-forming) activity; F:cellulose synthase (GDP-forming) activity; C:Golgi apparatus; C:plasma membrane	EC:2.4.1.12; EC:2.4.1.29
isotig00557	obtusifoliol 14alpha-demethylase	1336	10	0.0	93.7%	8	F:sterol 14-demethylase activity; C:plasma membrane; F:electron carrier activity; F:heme binding; P:methylation; F:methyltransferase activity; C:endoplasmic reticulum; P:oxidation-reduction process	EC:1.14.13.70; EC:2.1.1.0
isotig00558	signal peptide peptidase	1260	10	6.42623e-72	63.3%	6	C:chloroplast envelope; F:serine-type endopeptidase activity; P:response to light intensity; P:proteolysis; C:chloroplast thylakoid membrane; C:mitochondrion	EC:3.4.21.0
isotig00559	uv excision repair protein	1341	10	1.05673e-116	89.9%	4	P:proteasomal ubiquitin-dependent protein catabolic process; F:damaged DNA binding; P:nucleotide-excision repair; C:nucleus	-
isotig00560	hypothetical protein MTR_1g005050 [Medicago truncatula]	1347	2	2.15502e-17	89.0%	1	C:mitochondrion	-
isotig00561	nadh dehydrogenase subunit	1345	9	4.17331e-29	7.03333e+13	1	C:mitochondrion	-
isotig00562	histone deacetylase	1338	10	2.1397e-150	69.1%	7	F:histone deacetylase activity; P:protein import into peroxisome matrix; P:histone deacetylation; P:fatty acid beta-oxidation; C:cytoplasm; C:nucleus; P:protein N-linked glycosylation	-
isotig00563	probable nucleoredoxin 1-like	1335	10	3.40542e-148	82.3%	6	P:pollen tube guidance; P:response to cadmium ion; P:cell redox homeostasis; F:protein-disulfide reductase activity; P:pollen tube growth; P:oxidation-reduction process	EC:1.8.1.8
isotig00564	cytochrome p450	1336	10	3.82986e-99	66.2%	2	F:metal ion binding; F:oxidoreductase activity	-
isotig00565	glutamine synthetase	1333	10	0.0	97.3%	5	C:cytoplasm; F:glutamate-ammonia ligase activity; P:nitrogen fixation; F:ATP binding; P:glutamine biosynthetic process	EC:6.3.1.2
isotig00566	uncharacterized protein loc100259195	1319	10	8.1486e-148	85.1%	1	F:metal ion binding	-
isotig00567	dead box atp-dependent rna	1309	10	0.0	98.8%	9	C:nucleolus; C:plant-type cell wall; F:ATP-dependent helicase activity; F:nucleic acid binding; P:response to cadmium ion; C:plasma membrane; C:vacuolar membrane; F:ATP binding; C:cytosol	-
isotig00568	calcium-dependent protein kinase	1313	10	0.0	93.8%	5	F:calmodulin-dependent protein kinase activity; C:plasma membrane; F:calcium ion binding; P:protein phosphorylation; F:ATP binding	EC:2.7.11.17
isotig00569	transformation transcription domain-associated protein	1298	10	0.0	95.1%	12	P:cytokinesis by cell plate formation; C:cytosol; P:production of miRNAs involved in gene silencing by miRNA; C:plasmodesma; P:virus induced gene silencing; P:vegetative phase change; F:phosphotransferase activity, alcohol group as acceptor; P:microtubule cytoskeleton organization; P:production of ta-siRNAs involved in RNA interference; P:methylation-dependent chromatin silencing; P:phosphorylati…	EC:2.7.1.0
isotig00570	70 kda peptidyl-prolyl isomerase-like	1311	10	0.0	91.3%	4	P:protein folding; P:protein peptidyl-prolyl isomerization; C:vacuole; F:peptidyl-prolyl cis-trans isomerase activity	EC:5.2.1.8
isotig00571	protein chloroplastic-like	1300	10	1.13991e-109	94.4%	2	C:chloroplast outer membrane; P:chloroplast relocation	-
isotig00572	60s ribosomal protein	1293	10	0.0	98.6%	3	C:ribosome; F:structural constituent of ribosome; P:translation	-
isotig00573	protein chloroplastic-like	1302	10	5.51344e-103	77.4%	1	P:organ development	-
isotig00574	feronia receptor-like kinase	1288	10	2.17799e-141	78.7%	11	P:protein autophosphorylation; F:protein serine/threonine kinase activity; F:receptor activity; C:cytoplasmic membrane-bounded vesicle; C:filiform apparatus; F:ATP binding; P:pollen tube reception; P:post-embryonic development; F:non-membrane spanning protein tyrosine kinase activity; P:defense response to fungus; C:plasma membrane	EC:2.7.11.0; EC:2.7.10.2
isotig00575	acs-like protein	1301	10	0.0	92.2%	3	F:ligase activity; P:metabolic process; C:plasma membrane	-
isotig00576	dead-box atp-dependent rna helicase 14	1296	10	1.41324e-162	90.1%	6	F:RNA binding; F:ATP-dependent RNA helicase activity; P:ATP catabolic process; P:cell wall modification; F:ATP binding; P:plant-type cell wall organization	-
isotig00577	at5g17920 mpi7_60	1303	10	0.0	96.0%	17	C:cytosol; F:copper ion binding; P:methionine biosynthetic process; F:methionine synthase activity; F:zinc ion binding; C:peroxisome; P:response to salt stress; C:plasmodesma; F:5-methyltetrahydropteroyltriglutamate-homocysteine S-methyltransferase activity; P:methylation; C:vacuolar membrane; C:chloroplast stroma; P:response to zinc ion; P:response to cadmium ion; C:Golgi apparatus; C:plasma mem…	EC:2.1.1.13; EC:2.1.1.14
isotig00028	glycine dehydrogenase	3393	10	0.0	95.0%	10	P:oxidation-reduction process; F:glycine dehydrogenase (decarboxylating) activity; C:mitochondrion; C:chloroplast envelope; P:glycine catabolic process; F:ATP binding; F:2-alkenal reductase [NAD(P)] activity; P:response to cadmium ion; F:pyridoxal phosphate binding; C:apoplast	EC:1.4.4.2; EC:1.3.1.74
isotig00029	heat shock cognate protein 80-like	2200	10	0.0	97.6%	18	P:defense response; C:cytosol; C:cell wall; P:response to water deprivation; C:mitochondrion; P:protein folding; C:nucleolus; P:response to salt stress; P:heat acclimation; P:flower development; P:protein stabilization; C:vacuolar membrane; F:ATP binding; P:cellular response to calcium ion; P:leaf development; F:unfolded protein binding; C:plasma membrane; C:apoplast	-
isotig00030	heat shock cognate protein 80-like	2201	10	0.0	98.0%	18	P:defense response; C:cytosol; C:cell wall; P:response to water deprivation; C:mitochondrion; P:protein folding; C:nucleolus; P:response to salt stress; P:heat acclimation; P:flower development; P:protein stabilization; C:vacuolar membrane; F:ATP binding; P:cellular response to calcium ion; P:leaf development; F:unfolded protein binding; C:plasma membrane; C:apoplast	-
isotig00031	heat shock cognate protein 80-like	2200	10	0.0	98.0%	18	P:defense response; C:cytosol; C:cell wall; P:response to water deprivation; C:mitochondrion; P:protein folding; C:nucleolus; P:response to salt stress; P:heat acclimation; P:flower development; P:protein stabilization; C:vacuolar membrane; F:ATP binding; P:cellular response to calcium ion; P:leaf development; F:unfolded protein binding; C:plasma membrane; C:apoplast	-
isotig00032	heat shock cognate protein 80-like	2200	10	0.0	97.6%	18	P:defense response; C:cytosol; C:cell wall; P:response to water deprivation; C:mitochondrion; P:protein folding; C:nucleolus; P:response to salt stress; P:heat acclimation; P:flower development; P:protein stabilization; C:vacuolar membrane; F:ATP binding; P:cellular response to calcium ion; P:leaf development; F:unfolded protein binding; C:plasma membrane; C:apoplast	-
isotig00033	heat shock cognate protein 80-like	2201	10	0.0	98.0%	18	P:defense response; C:cytosol; C:cell wall; P:response to water deprivation; C:mitochondrion; P:protein folding; C:nucleolus; P:response to salt stress; P:heat acclimation; P:flower development; P:protein stabilization; C:vacuolar membrane; F:ATP binding; P:cellular response to calcium ion; P:leaf development; F:unfolded protein binding; C:plasma membrane; C:apoplast	-
isotig00034	heat shock cognate protein 80-like	2200	10	0.0	97.7%	18	P:defense response; C:cytosol; C:cell wall; P:response to water deprivation; C:mitochondrion; P:protein folding; C:nucleolus; P:response to salt stress; P:heat acclimation; P:flower development; P:protein stabilization; C:vacuolar membrane; F:ATP binding; P:cellular response to calcium ion; P:leaf development; F:unfolded protein binding; C:plasma membrane; C:apoplast	-
isotig00035	polyubiquitin 10	1599	10	0.0	99.0%	6	C:vacuole; P:response to UV-B; P:cellular protein modification process; P:response to salicylic acid stimulus; P:aging; C:nucleus	-
isotig00036	polyubiquitin 10	1514	10	0.0	99.0%	6	C:vacuole; P:response to UV-B; P:cellular protein modification process; P:response to salicylic acid stimulus; P:aging; C:nucleus	-
isotig00037	polyubiquitin 3	1097	10	2.8702e-128	99.6%	7	P:protein targeting to vacuole; C:vacuole; P:response to UV-B; P:cellular protein modification process; P:ubiquitin-dependent protein catabolic process; P:vesicle-mediated transport; C:nucleus	-
isotig00578	rpp4 candidate	1267	10	2.11577e-35	58.5%	2	F:hydrolase activity; F:nucleotide binding	-
isotig00579	plasminogen activator inhibitor 1 rna-binding	1295	10	3.96766e-53	70.7%	1	C:intracellular part	-
isotig00580	thiamine biosynthesis protein	1299	10	0.0	98.0%	12	F:ADP-ribose pyrophosphohydrolase activity; P:pentose-phosphate shunt; P:glucosinolate metabolic process; P:positive regulation of catalytic activity; P:starch biosynthetic process; P:detection of bacterium; P:isopentenyl diphosphate biosynthetic process, methylerythritol 4-phosphate pathway; P:maltose metabolic process; F:iron-sulfur cluster binding; P:response to vitamin B1; C:chloroplast strom…	-
isotig00581	ubiquitin carboxyl-terminal	1284	10	0.0	90.6%	2	P:ubiquitin-dependent protein catabolic process; F:ubiquitin thiolesterase activity	EC:3.1.2.15
isotig00582	importin beta-	1286	10	0.0	93.4%	10	C:cytosol; F:protein transporter activity; C:cell wall; F:lyase activity; P:nucleotide biosynthetic process; P:cell wall pectin metabolic process; C:phycobilisome; P:intracellular protein transport; P:plant-type cell wall cellulose metabolic process; P:embryo development ending in seed dormancy	-
isotig00583	nodulation receptor kinase	1269	10	2.30581e-156	94.9%	22	P:brassinosteroid biosynthetic process; P:protein phosphorylation; P:starch metabolic process; F:protein serine/threonine kinase activity; C:integral to membrane; P:regulation of meristem growth; P:auxin polar transport; P:acetyl-CoA metabolic process; F:receptor activity; P:transmembrane receptor protein tyrosine kinase signaling pathway; P:regulation of cell size; F:protein tyrosine kinase acti…	EC:2.7.11.0; EC:2.7.10.0; EC:2.7.11.26
isotig00584	serine threonine-protein phosphatase pp2a catalytic subunit-like	1273	10	0.0	98.4%	4	C:nucleolus; C:cytosol; F:protein serine/threonine phosphatase activity; C:plasma membrane	-
isotig00585	fructose-bisphosphate aldolase	1287	10	0.0	94.7%	13	C:cytosol; F:copper ion binding; C:cell wall; C:nucleolus; P:response to salt stress; P:glycolysis; C:mitochondrial envelope; F:fructose-bisphosphate aldolase activity; C:chloroplast; P:response to cadmium ion; P:response to karrikin; C:plasma membrane; C:apoplast	EC:4.1.2.13
isotig00586	magnesium-protoporphyrin ix monomethyl ester	1285	10	0.0	91.4%	7	F:magnesium-protoporphyrin IX monomethyl ester (oxidative) cyclase activity; P:oxidation-reduction process; F:transition metal ion binding; P:chlorophyll biosynthetic process; C:chloroplast inner membrane; C:chloroplast thylakoid membrane; P:photosynthesis	EC:1.14.13.81
isotig00587	calcium-transporting atpase plasma membrane-type	1260	10	8.85433e-151	94.2%	10	F:calcium-transporting ATPase activity; F:calmodulin binding; P:calcium ion transmembrane transport; C:integral to membrane; F:metal ion binding; P:ATP biosynthetic process; F:ATP binding; C:chloroplast inner membrane; C:endoplasmic reticulum membrane; C:plasma membrane	EC:3.6.3.8
isotig00588	phytoene synthase	1279	10	5.45013e-156	88.8%	3	P:carotenoid biosynthetic process; F:transferase activity, transferring alkyl or aryl (other than methyl) groups; C:chloroplast	EC:2.5.1.0
isotig00589	phosphatidylcholine transfer	1273	10	1.18665e-134	87.3%	1	C:vacuole	-
isotig00590	ribosomal protein s16	1268	10	5.25325e-18	91.8%	4	C:ribosome; F:structural constituent of ribosome; C:chloroplast; P:translation	-
isotig00591	n-rich protein	1264	10	1.93733e-97	70.5%	0	-
isotig00592	cytochrome p450	1257	10	1.9897e-85	72.8%	2	F:oxidoreductase activity, acting on paired donors, with incorporation or reduction of molecular oxygen, NAD(P)H as one donor, and incorporation of one atom of oxygen; F:iron ion binding	EC:1.14.13.0
isotig00593	protein phosphatase 2c 12	1249	10	0.0	90.2%	3	C:cytosol; F:protein serine/threonine phosphatase activity; P:metabolic process	-
isotig00594	ubiquilin-1-like isoform 1	1254	10	4.08062e-140	77.5%	0	-
isotig00595	tubulin beta-8 chain	1256	10	0.0	99.6%	15	P:proteasomal protein catabolic process; P:response to salt stress; C:microtubule; C:tubulin complex; P:cytoskeleton organization; P:protein polymerization; P:GTP catabolic process; P:microtubule-based movement; F:protein binding; F:GTPase activity; P:gluconeogenesis; F:structural constituent of cytoskeleton; C:membrane; C:Golgi apparatus; F:GTP binding	-
isotig00596	anthranilate n-benzoyltransferase	1260	10	2.38476e-71	58.9%	1	F:transferase activity	-
isotig00597	thiazole biosynthetic chloroplastic	1259	10	5.73304e-142	95.1%	11	P:oxazole or thiazole biosynthetic process; F:zinc ion binding; C:mitochondrion; P:response to cold; C:chloroplast envelope; C:thylakoid; P:thiamine biosynthetic process; C:chloroplast stroma; F:protein homodimerization activity; C:stromule; P:response to DNA damage stimulus	-
isotig00598	zinc finger	1259	10	1.65649e-165	93.0%	2	P:lipid metabolic process; F:hydrolase activity, acting on ester bonds	-
isotig00599	probable -trehalose-phosphate synthase	1239	10	0.0	92.9%	3	F:alpha,alpha-trehalose-phosphate synthase (UDP-forming) activity; F:trehalose-phosphatase activity; P:trehalose biosynthetic process	EC:2.4.1.15; EC:3.1.3.12
isotig00600	protein phosphatase 2c	1249	10	9.49755e-121	84.0%	8	P:negative regulation of abscisic acid mediated signaling pathway; P:protein dephosphorylation; P:response to water deprivation; F:metal ion binding; P:response to cold; C:protein serine/threonine phosphatase complex; P:regulation of stomatal movement; F:protein serine/threonine phosphatase activity	-
isotig00601	homeobox protein knotted-	1248	10	4.09953e-118	96.9%	8	C:cytosol; P:detection of cytokinin stimulus; P:cellular response to cytokine stimulus; P:response to light stimulus; P:regulation of transcription, DNA-dependent; F:sequence-specific DNA binding; F:sequence-specific DNA binding transcription factor activity; C:nucleus	-
isotig00602	alanine glyoxylate aminotransferase	1244	10	0.0	87.9%	9	F:alanine-glyoxylate transaminase activity; F:pyridoxal phosphate binding; F:serine-pyruvate transaminase activity; C:peroxisome; C:plasma membrane; F:serine-glyoxylate transaminase activity; C:chloroplast stroma; P:metabolic process; C:apoplast	EC:2.6.1.44; EC:2.6.1.51; EC:2.6.1.45
isotig00603	cystathionine gamma-synthase	1240	10	9.2035e-153	83.5%	7	F:pyridoxal phosphate binding; F:cystathionine gamma-synthase activity; P:selenium compound metabolic process; P:methionine biosynthetic process; P:one-carbon metabolic process; C:chloroplast stroma; F:lyase activity	EC:2.5.1.48
isotig00604	set domain protein	1220	10	1.46219e-94	67.5%	5	F:histone methyltransferase activity (H3-K4 specific); P:carpel development; P:histone lysine methylation; P:stamen development; P:vegetative to reproductive phase transition of meristem	-
isotig00605	uncharacterized protein	1232	10	2.45586e-102	86.2%	3	F:molecular_function; P:biological_process; C:cellular_component
isotig00606	70 kda peptidyl-prolyl isomerase-like	1235	10	0.0	92.5%	3	P:protein folding; P:protein peptidyl-prolyl isomerization; F:peptidyl-prolyl cis-trans isomerase activity	EC:5.2.1.8
isotig00607	disease resistance protein rga4-like	1209	10	3.42483e-70	70.7%	2	P:defense response; F:ADP binding
isotig00608	calreticulin 2	1217	10	3.05553e-160	92.3%	13	P:protein folding; C:vacuole; C:endoplasmic reticulum lumen; P:calcium ion homeostasis; P:response to oxidative stress; P:response to cadmium ion; F:carbohydrate binding; C:plasma membrane; F:calcium ion binding; F:unfolded protein binding; C:chloroplast; P:response to salt stress; C:mitochondrion	-
isotig00609	auxilin-related protein 2	1199	10	1.46225e-70	61.8%	3	F:binding; C:plasma membrane; C:cytosol	-
isotig00610	rna binding	1214	10	9.0389e-163	94.3%	3	F:nucleic acid binding; C:ribonucleoprotein complex; F:nucleotide binding	-
isotig00611	endomembrane protein emp70 precusor isolog	1207	10	2.17364e-121	96.6%	2	C:integral to membrane; C:Golgi apparatus	-
isotig00612	glutamyl-trna reductase	1216	10	0.0	94.2%	8	P:response to oxidative stress; F:NADP binding; P:protoporphyrinogen IX biosynthetic process; P:chlorophyll biosynthetic process; C:chloroplast; P:response to light stimulus; F:glutamyl-tRNA reductase activity; P:oxidation-reduction process	EC:1.2.1.70
isotig00613	alcohol acyl transferase	1214	10	3.65778e-130	76.3%	1	F:transferase activity, transferring acyl groups other than amino-acyl groups	EC:2.3.1.0
isotig00614	nadh-ubiquinone oxidoreductase chain	1213	8	1.16153e-36	811.25	3	F:oxidoreductase activity; C:mitochondrion; P:oxidation-reduction process	-
isotig00615	uncharacterized protein sll0005-like	1192	10	3.39858e-153	90.1%	7	P:flavonoid biosynthetic process; P:response to sucrose stimulus; P:response to UV-B; F:protein kinase activity; P:protein phosphorylation; F:ATP binding; C:chloroplast	-
isotig00616	abc transporter c family member 2	1202	10	0.0	95.7%	15	P:arsenite transport; P:oxidation-reduction process; F:arsenite-transmembrane transporting ATPase activity; F:xenobiotic-transporting ATPase activity; C:integral to membrane; C:plant-type vacuole; P:ATP catabolic process; F:phytochelatin transmembrane transporter activity; P:phytochelatin transmembrane transport; C:vacuolar membrane; F:ATP binding; F:2-alkenal reductase [NAD(P)] activity; P:respo…	EC:3.6.3.16; EC:3.6.3.44; EC:1.3.1.74
isotig00617	serine-threonine kinase	1204	10	1.52321e-136	85.9%	4	F:calmodulin-dependent protein kinase activity; P:negative regulation of abscisic acid mediated signaling pathway; P:protein phosphorylation; F:ATP binding	EC:2.7.11.17
isotig00618	subtilisin-like protease-like	1203	10	0.0	91.6%	19	C:plant extracellular matrix; C:cell wall; P:starch metabolic process; P:serine family amino acid metabolic process; P:regulation of meristem growth; F:identical protein binding; P:sulfur amino acid metabolic process; P:proteolysis; P:cellular amino acid biosynthetic process; F:protein serine/threonine phosphatase activity; P:negative regulation of catalytic activity; F:serine-type endopeptidase …	EC:3.4.21.0
isotig00619	glycolate oxidase	1199	10	9.861e-147	99.5%	13	C:cytosolic ribosome; F:medium-chain-(S)-2-hydroxy-acid oxidase activity; C:vacuole; F:very-long-chain-(S)-2-hydroxy-acid oxidase activity; F:glycolate oxidase activity; F:long-chain-(S)-2-hydroxy-long-chain-acid oxidase activity; C:peroxisome; F:FMN binding; C:chloroplast stroma; C:membrane; C:nucleus; C:apoplast; P:oxidation-reduction process	-
isotig00620	if4a3_orysj ame: full=eukaryotic initiation factor 4a-3 short=eif-4a-3 ame: full=atp-dependent rna helicase eif4a-3 ame: full=dead-box atp-dependent rna helicase 23 ame: full=eif4a-2	1191	10	0.0	98.0%	8	C:nucleolus; C:plant-type cell wall; F:ATP-dependent helicase activity; F:nucleic acid binding; P:response to cadmium ion; C:plasma membrane; F:ATP binding; C:cytosol	-
isotig00621	secologanin synthase-like	1172	10	3.40008e-117	75.1%	2	F:oxidoreductase activity; F:iron ion binding	-
isotig00622	gras family transcription factor	1165	10	1.12129e-138	82.9%	4	C:cytoplasm; F:sequence-specific DNA binding transcription factor activity; C:nucleus; P:regulation of transcription, DNA-dependent	-
isotig00623	metk_litcn ame: full=s-adenosylmethionine synthase short= et synthase ame: full=methionine adenosyltransferase short=mat	1187	10	1.64311e-155	97.8%	13	C:cell wall; P:methionine metabolic process; C:nucleolus; P:response to salt stress; F:methionine adenosyltransferase activity; F:metal ion binding; P:response to cold; P:S-adenosylmethionine biosynthetic process; P:one-carbon metabolic process; F:ATP binding; P:lignin biosynthetic process; C:cytoplasm; C:plasma membrane	EC:2.5.1.6
isotig00624	eukaryotic translation initiation factor 3	1172	10	3.30089e-104	68.8%	4	P:cellular macromolecule metabolic process; P:nucleic acid metabolic process; P:response to abscisic acid stimulus; P:phospholipid biosynthetic process	-
isotig00625	elongation factor family protein	1175	10	0.0	97.2%	9	F:translation elongation factor activity; P:response to reactive oxygen species; P:regulation of gene expression; P:chloroplast RNA processing; P:translational elongation; P:GTP catabolic process; C:chloroplast stroma; F:GTPase activity; F:GTP binding	-
isotig00626	dihydroflavonol-4-reductase isoform 1	1166	10	3.02631e-76	74.2%	4	F:binding; F:oxidoreductase activity; P:brassinosteroid metabolic process; P:cellular biosynthetic process	-
isotig00627	PREDICTED: phosphoribulokinase, chloroplastic-like [Vitis vinifera]	1169	10	1.28322e-163	97.5%	11	P:defense response to bacterium; P:response to cold; C:chloroplast envelope; P:carbohydrate metabolic process; F:ATP binding; F:phosphoribulokinase activity; C:chloroplast thylakoid membrane; P:phosphorylation; C:chloroplast stroma; C:stromule; C:apoplast	EC:2.7.1.19
isotig00628	carbamoyl-phosphate synthase large chain-like	1155	10	0.0	93.9%	7	F:metal ion binding; P:cellular response to phosphate starvation; F:ATP binding; C:chloroplast stroma; P:nitrogen compound metabolic process; C:membrane; F:carbamoyl-phosphate synthase (ammonia) activity	EC:6.3.4.16
isotig00629	2-dehydro-3-deoxyphosphoheptonate aldolase 3-deoxy-d-arabino-heptulosonate 7-phosphate synthetase	1168	10	0.0	97.4%	6	P:shikimate biosynthetic process; P:chorismate biosynthetic process; F:3-deoxy-7-phosphoheptulonate synthase activity; P:aromatic amino acid family biosynthetic process; F:lyase activity; C:membrane	EC:2.5.1.54
isotig00630	cytochrome p450 ent-kaurenoic acid oxidase	1166	10	2.35324e-94	68.9%	2	F:metal ion binding; F:oxidoreductase activity	-
isotig00631	disease resistance protein at3g14460-like	1152	10	7.27729e-48	63.8%	2	P:defense response; F:ADP binding
isotig00632	elongation factor 1-	1161	10	0.0	99.5%	7	F:nucleotidyltransferase activity; F:translation elongation factor activity; P:translational elongation; P:GTP catabolic process; F:GTPase activity; C:cytoplasm; F:GTP binding	EC:2.7.7.0
isotig00633	chalcone synthase	1146	10	2.32165e-131	98.1%	12	P:response to oxidative stress; F:naringenin-chalcone synthase activity; P:response to jasmonic acid stimulus; P:response to UV-B; P:auxin polar transport; P:response to wounding; C:plant-type vacuole membrane; P:chalcone biosynthetic process; P:regulation of anthocyanin biosynthetic process; P:response to gravity; C:endoplasmic reticulum; C:nucleus	EC:2.3.1.74
isotig00634	udp-glucose pyrophosphorylase	1132	10	0.0	94.0%	8	P:pollen development; P:response to cadmium ion; P:callose deposition in cell wall; C:plasma membrane; P:cellular response to phosphate starvation; F:UTP:glucose-1-phosphate uridylyltransferase activity; P:metabolic process; P:response to salt stress	EC:2.7.7.9
isotig00635	dead-box atp-dependent rna helicase 7-like	1153	10	5.17115e-148	91.8%	4	C:nucleolus; F:ATP-dependent helicase activity; F:RNA binding; F:ATP binding	-
isotig00636	nadph:protochlorophyllide oxidoreductase	1152	10	1.3866e-139	96.2%	9	F:NADPH dehydrogenase activity; F:protochlorophyllide reductase activity; P:chlorophyll biosynthetic process; C:chloroplast; C:membrane; P:response to ethylene stimulus; P:photosynthesis; F:nucleotide binding; P:oxidation-reduction process	EC:1.6.99.1; EC:1.3.1.33
isotig00637	polyprotein [Solanum lycopersicum]	1145	10	8.91998e-39	53.6%	3	F:binding; P:macromolecule metabolic process; P:primary metabolic process	-
isotig00638	atp synthase subunit mitochondrial-like	1121	10	0.0	94.4%	18	F:proton-transporting ATPase activity, rotational mechanism; C:chloroplast envelope; F:zinc ion binding; F:hydrogen-exporting ATPase activity, phosphorylative mechanism; F:proton-transporting ATP synthase activity, rotational mechanism; P:ATP hydrolysis coupled proton transport; C:nucleolus; F:cobalt ion binding; C:mitochondrial respiratory chain complex I; C:mitochondrial proton-transporting ATP…	EC:3.6.3.6
isotig00639	#NAME?	1123	10	1.07879e-165	92.8%	10	F:manganese ion binding; P:response to cold; P:response to cadmium ion; C:plasma membrane; C:mitochondrial envelope; F:phosphoglycerate mutase activity; P:glycolysis; C:chloroplast; C:cytosol; C:apoplast	EC:5.4.2.1
isotig00640	nac domain protein nac2	1126	10	7.90242e-116	80.7%	4	P:negative regulation of abscisic acid mediated signaling pathway; P:regulation of transcription, DNA-dependent; P:response to wounding; F:DNA binding	-
isotig00641	methyltransferase pmt2	1123	10	3.37548e-149	89.1%	4	C:membrane; C:Golgi apparatus; P:methylation; F:methyltransferase activity	EC:2.1.1.0
isotig00642	aldehyde dehydrogenase	1122	10	0.0	94.3%	3	F:retinal dehydrogenase activity; P:oxidation-reduction process; F:aldehyde dehydrogenase (NAD) activity	EC:1.2.1.36; EC:1.2.1.3
isotig00643	isoflavone 2 -hydroxylase-like	1129	10	2.79764e-129	80.2%	4	F:heme binding; F:isoflavone 2'-hydroxylase activity; F:electron carrier activity; P:oxidation-reduction process	EC:1.14.13.89
isotig00644	aminomethyltransferase [Cucumis melo subsp. melo]	1122	10	3.25569e-154	92.7%	10	C:chloroplast envelope; C:cytosolic ribosome; P:glycine catabolic process; P:response to cadmium ion; F:aminomethyltransferase activity; P:methylation; F:transaminase activity; C:membrane; C:apoplast; C:mitochondrion	EC:2.1.2.10; EC:2.6.1.0
isotig00645	microsomal delta-12 oleate desaturase	1112	10	5.14709e-144	90.4%	5	F:omega-6 fatty acid desaturase activity; F:delta12-fatty acid dehydrogenase activity; P:oxidation-reduction process; P:lipid metabolic process; F:oxidoreductase activity, acting on paired donors, with oxidation of a pair of donors resulting in the reduction of molecular oxygen to two molecules of water	EC:1.14.99.33; EC:1.14.19.0
isotig00646	amp dependent	1114	10	2.24692e-139	92.3%	5	P:response to cadmium ion; P:metabolic process; C:apoplast; F:o-succinylbenzoate-CoA ligase activity; C:chloroplast	EC:6.2.1.26
isotig00647	oxysterol-binding family protein	1116	10	0.0	92.6%	7	F:oxysterol binding; F:protein binding; P:steroid metabolic process; P:double fertilization forming a zygote and endosperm; P:ER to Golgi vesicle-mediated transport; C:cytosol; C:endoplasmic reticulum	-
isotig00648	thaumatin-like protein 1-like	1103	10	2.6716e-96	86.6%	0	-
isotig00649	udp-glucose 6-dehydrogenase	1113	10	0.0	97.1%	4	F:NAD binding; P:UDP-glucuronate biosynthetic process; F:UDP-glucose 6-dehydrogenase activity; P:oxidation-reduction process	EC:1.1.1.22
isotig00650	60s acidic ribosomal protein p0	1086	10	1.02844e-120	91.5%	13	F:copper ion binding; C:nucleolus; P:response to salt stress; P:response to cold; F:structural constituent of ribosome; F:DNA-(apurinic or apyrimidinic site) lyase activity; P:translational elongation; P:ribosome biogenesis; P:response to zinc ion; C:chloroplast; P:response to cadmium ion; C:cytosolic ribosome; C:plasma membrane	EC:4.2.99.18
isotig00651	vacuolar h+-translocating inorganic pyrophosphatase	1098	10	2.33689e-149	96.7%	14	P:oxidation-reduction process; P:response to water deprivation; C:mitochondrion; P:response to salt stress; P:auxin polar transport; C:chloroplast envelope; C:plant-type vacuole membrane; F:inorganic diphosphatase activity; P:leaf development; F:2-alkenal reductase [NAD(P)] activity; C:endosome membrane; P:proton transport; F:hydrogen-translocating pyrophosphatase activity; C:plasma membrane	EC:3.6.1.1; EC:1.3.1.74
isotig00652	probable chlorophyll b reductase chloroplastic-like	1086	10	1.31849e-153	89.3%	7	P:chlorophyll catabolic process; F:glucose 1-dehydrogenase [NAD(P)] activity; P:PSII associated light-harvesting complex II catabolic process; F:chlorophyll(ide) b reductase activity; C:plastid membrane; F:nucleotide binding; P:oxidation-reduction process	EC:1.1.1.47; EC:1.1.1.294
isotig00653	1-aminocyclopropane-1-carboxylate oxidase	1103	10	8.15498e-127	93.7%	9	P:detection of ethylene stimulus; P:ethylene biosynthetic process; F:copper ion binding; C:plasma membrane; C:cell wall; F:oxidoreductase activity, acting on paired donors, with incorporation or reduction of molecular oxygen, 2-oxoglutarate as one donor, and incorporation of one atom each of oxygen into both donors; P:response to salt stress; P:oxidation-reduction process; P:response to fungus	EC:1.14.11.0
isotig00654	adagio protein 1	1083	10	4.48423e-99	97.4%	14	P:flower development; F:blue light photoreceptor activity; P:fatty acid beta-oxidation; F:protein binding; P:response to red light; P:regulation of transcription, DNA-dependent; P:protein import into peroxisome matrix; C:cytosol; C:SCF ubiquitin ligase complex; F:ubiquitin-protein ligase activity; P:SCF-dependent proteasomal ubiquitin-dependent protein catabolic process; P:entrainment of circadia…	EC:6.3.2.19
isotig00655	protochlorophyllide chloroplastic-like	1101	10	3.06474e-149	96.6%	9	P:oxidation-reduction process; F:NADPH dehydrogenase activity; P:chlorophyll biosynthetic process; C:chloroplast envelope; F:protochlorophyllide reductase activity; C:chloroplast thylakoid membrane; F:nucleotide binding; P:photosynthesis; P:response to ethylene stimulus	EC:1.6.99.1; EC:1.3.1.33
isotig00656	pyridoxine biosynthesis protein	1099	10	3.6371e-134	97.9%	19	C:cytosol; P:pyridoxal phosphate biosynthetic process; P:response to UV-B; P:chlorophyll metabolic process; P:response to non-ionic osmotic stress; P:pentose-phosphate shunt; P:pyridoxine biosynthetic process; P:hyperosmotic salinity response; P:cellular amino acid metabolic process; P:response to lipid hydroperoxide; P:maltose metabolic process; P:starch biosynthetic process; C:endomembrane syst…	-
isotig00657	pyrophosphate-energized vacuolar membrane proton pump-like	1090	10	0.0	96.3%	14	P:oxidation-reduction process; P:response to water deprivation; C:mitochondrion; P:response to salt stress; P:auxin polar transport; C:chloroplast envelope; C:plant-type vacuole membrane; F:inorganic diphosphatase activity; P:leaf development; F:2-alkenal reductase [NAD(P)] activity; C:endosome membrane; P:proton transport; F:hydrogen-translocating pyrophosphatase activity; C:plasma membrane	EC:3.6.1.1; EC:1.3.1.74
isotig00658	cytochrome c oxidase subunit 2	1100	10	2.21681e-115	98.3%	8	C:mitochondrial inner membrane; F:copper ion binding; C:respiratory chain; F:electron carrier activity; F:heme binding; C:integral to membrane; P:respiratory electron transport chain; F:cytochrome-c oxidase activity	EC:1.9.3.1
isotig00659	peroxisomal membrane	1093	10	1.14226e-115	88.7%	3	C:cytoplasmic membrane-bounded vesicle; C:integral to membrane; C:plastid	-
isotig00660	ubiquitin ligase e3	1086	10	5.64781e-112	78.4%	9	P:wax biosynthetic process; P:regulation of seed germination; P:ubiquitin-dependent protein catabolic process; F:zinc ion binding; P:regulation of lipid catabolic process; P:cuticle hydrocarbon biosynthetic process; F:ubiquitin-protein ligase activity; P:protein ubiquitination; P:response to abscisic acid stimulus	EC:6.3.2.19
isotig00661	guanine nucleotide-binding protein subunit beta-like protein	1090	10	7.98049e-158	94.1%	9	C:nucleolus; F:receptor activity; C:cytosolic ribosome; F:myosin heavy chain kinase activity; P:response to cadmium ion; P:phosphorylation; P:root development; P:shoot system development; C:chloroplast	EC:2.7.11.7
isotig00662	chalcone synthase	1078	10	0.0	97.7%	2	F:naringenin-chalcone synthase activity; P:flavonoid biosynthetic process	EC:2.3.1.74
isotig00663	cytochrome p450 ent-kaurenoic acid oxidase	1088	10	6.02928e-90	69.5%	2	F:metal ion binding; F:oxidoreductase activity	-
isotig00664	protein	1069	10	8.20196e-91	67.3%	3	P:phosphorylation; F:protein kinase activity; F:nucleotide binding	-
isotig00665	cytosolic ascorbate peroxidase	1084	10	2.27113e-96	93.4%	4	F:heme binding; P:oxidation-reduction process; F:L-ascorbate peroxidase activity; P:response to oxidative stress	EC:1.11.1.11
isotig00666	protein vernalization insensitive 3-like	1073	10	1.60014e-102	67.6%	1	P:vegetative to reproductive phase transition of meristem	-
isotig00667	receptor-like protein kinase theseus 1-like	1072	10	6.66073e-133	81.1%	8	P:protein autophosphorylation; P:regulation of unidimensional cell growth; F:protein serine/threonine kinase activity; C:plasmodesma; F:ATP binding; P:post-embryonic development; P:brassinosteroid mediated signaling pathway; C:plasma membrane	EC:2.7.11.0
isotig00668	p-loop containing nucleoside triphosphate hydrolase-like protein	1069	10	1.74129e-141	88.5%	6	P:microtubule-based movement; C:plasma membrane; F:ATP binding; P:microtubule nucleation; F:microtubule motor activity; C:microtubule	-
isotig00669	nematode resistance hspro2 isoform 1	1064	10	9.70072e-103	75.5%	3	P:defense response to bacterium, incompatible interaction; P:response to salicylic acid stimulus; P:response to oxidative stress	-
isotig00670	hsp associated protein like	1077	10	8.13018e-67	90.6%	7	P:response to cadmium ion; F:heme binding; C:cytosol; F:oxidoreductase activity, acting on paired donors, with incorporation or reduction of molecular oxygen; F:monooxygenase activity; F:electron carrier activity; P:oxidation-reduction process	-
isotig00671	lipid binding	1074	10	1.93903e-15	96.1%	3	P:lipid transport; C:apoplast; C:chloroplast thylakoid membrane	-
isotig00672	protein ethylene insensitive 3-like	1072	10	5.69752e-160	86.5%	6	P:defense response to bacterium; F:sequence-specific DNA binding transcription factor activity; F:DNA binding; C:nucleus; P:response to ethylene stimulus; P:regulation of transcription, DNA-dependent	-
isotig00673	atp synthase	1055	10	1.44581e-132	95.7%	31	P:coenzyme biosynthetic process; F:enzyme regulator activity; P:jasmonic acid biosynthetic process; P:leaf morphogenesis; P:positive regulation of catalytic activity; P:cysteine biosynthetic process; C:chloroplast ATP synthase complex; P:aromatic amino acid family metabolic process; C:proton-transporting ATP synthase complex, catalytic core F(1); P:photosynthetic electron transport in photosystem…	-
isotig00674	ribosomal protein s18	1067	10	8.05828e-22	95.9%	5	C:ribosome; F:structural constituent of ribosome; C:chloroplast; P:translation; F:rRNA binding	-
isotig00675	transcriptional corepressor seuss-like	1059	10	2.24492e-141	88.0%	8	P:embryo development; P:hydrogen peroxide catabolic process; F:DNA binding; F:transcription cofactor activity; P:regulation of flower development; F:protein heterodimerization activity; F:binding, bridging; P:ovule development	-
isotig00676	atp binding	1063	10	1.38061e-106	83.4%	7	P:regulation of unidimensional cell growth; F:receptor activity; F:ATP binding; P:activation of MAPKK activity; F:MAP kinase kinase kinase activity; C:plasma membrane; P:MAPK cascade	EC:2.7.11.25
isotig00677	bax inhibitor 1	1041	10	3.20185e-77	86.8%	7	P:very long-chain fatty acid metabolic process; P:ER overload response; P:response to water deprivation; C:integral to membrane; P:negative regulation of apoptotic process; C:nuclear envelope; C:endoplasmic reticulum	-
isotig00038	polyubiquitin 3	1060	10	2.75119e-128	99.6%	7	P:protein targeting to vacuole; C:vacuole; P:response to UV-B; P:cellular protein modification process; P:ubiquitin-dependent protein catabolic process; P:vesicle-mediated transport; C:nucleus	-
isotig00039	polyubiquitin	1019	10	1.89453e-137	99.7%	2	C:nucleus; C:cytoplasm	-
isotig00040	---NA---	1600	0			0	-
isotig00041	---NA---	1600	0			0	-
isotig00042	---NA---	1552	0			0	-
isotig00043	---NA---	268	0			0	-
isotig00044	ribulose bisphosphate carboxylase oxygenase activase chloroplastic-like	1677	10	0.0	94.0%	16	C:cell wall; P:response to jasmonic acid stimulus; F:ribulose-1,5-bisphosphate carboxylase/oxygenase activator activity; F:ADP binding; P:defense response to bacterium; P:response to light stimulus; P:response to cold; C:chloroplast envelope; F:ATP binding; C:chloroplast thylakoid membrane; P:leaf senescence; C:plastoglobule; P:regulation of catalytic activity; C:nucleus; C:stromule; C:apoplast	-
isotig00045	ribulose bisphosphate carboxylase oxygenase activase chloroplastic-like	1677	10	0.0	94.0%	16	C:cell wall; P:response to jasmonic acid stimulus; F:ribulose-1,5-bisphosphate carboxylase/oxygenase activator activity; F:ADP binding; P:defense response to bacterium; P:response to light stimulus; P:response to cold; C:chloroplast envelope; F:ATP binding; C:chloroplast thylakoid membrane; P:leaf senescence; C:plastoglobule; P:regulation of catalytic activity; C:nucleus; C:stromule; C:apoplast	-
isotig00046	ribulose bisphosphate carboxylase oxygenase activase chloroplastic-like	1603	10	0.0	93.7%	16	C:cell wall; P:response to jasmonic acid stimulus; F:ribulose-1,5-bisphosphate carboxylase/oxygenase activator activity; F:ADP binding; P:defense response to bacterium; P:response to light stimulus; P:response to cold; C:chloroplast envelope; F:ATP binding; C:chloroplast thylakoid membrane; P:leaf senescence; C:plastoglobule; P:regulation of catalytic activity; C:nucleus; C:stromule; C:apoplast	-
isotig00047	ribulose bisphosphate carboxylase oxygenase activase chloroplastic-like	1603	10	0.0	93.7%	16	C:cell wall; P:response to jasmonic acid stimulus; F:ribulose-1,5-bisphosphate carboxylase/oxygenase activator activity; F:ADP binding; P:defense response to bacterium; P:response to light stimulus; P:response to cold; C:chloroplast envelope; F:ATP binding; C:chloroplast thylakoid membrane; P:leaf senescence; C:plastoglobule; P:regulation of catalytic activity; C:nucleus; C:stromule; C:apoplast	-
isotig00678	ferredoxin--nadp leaf chloroplastic-like isoform 1	1051	10	9.64117e-157	96.3%	13	P:electron transport chain; F:poly(U) RNA binding; F:NADPH dehydrogenase activity; P:defense response to bacterium; F:ferredoxin-NADP+ reductase activity; F:protein binding; C:chloroplast thylakoid membrane; F:flavin adenine dinucleotide binding; C:chloroplast stroma; P:defense response to fungus, incompatible interaction; F:NADP binding; P:photosynthesis; C:apoplast	EC:1.6.99.1; EC:1.18.1.2
isotig00679	plasma membrane intrinsic protein	1051	10	4.03522e-138	96.8%	10	P:response to water deprivation; C:chloroplast envelope; C:vacuole; C:anchored to plasma membrane; P:water transport; P:transmembrane transport; C:integral to membrane; C:mitochondrion; P:response to salt stress; F:transporter activity	-
isotig00680	squamosa promoter-binding-like protein 1-like	1053	10	4.12759e-83	71.6%	2	C:nucleus; F:DNA binding
isotig00681	cysteine protease	1053	10	4.60806e-163	89.4%	8	C:vacuole; F:2-alkenal reductase [NAD(P)] activity; C:chloroplast; P:proteolysis; C:apoplast; P:response to salt stress; F:cysteine-type peptidase activity; P:oxidation-reduction process	EC:1.3.1.74
isotig00682	adp-ribosylation factor gtpase-activating protein agd10	1034	10	2.41434e-68	81.0%	8	F:zinc ion binding; P:plant-type cell wall modification; P:embryo development ending in seed dormancy; P:regulation of ARF GTPase activity; P:pollen development; P:response to abscisic acid stimulus; P:pollen tube growth; F:ARF GTPase activator activity	-
isotig00683	protein regulator of	1047	10	2.43383e-77	95.2%	11	F:microtubule binding; P:anaphase; P:microtubule bundle formation; P:cytokinesis; C:cortical microtubule, transverse to long axis; C:preprophase band; C:spindle; P:microtubule nucleation; C:phragmoplast; C:nucleus; P:positive regulation of microtubule polymerization	-
isotig00684	protein	1048	10	8.79768e-74	65.6%	1	C:plasma membrane
isotig00685	peroxidase 2	1046	10	2.79749e-112	81.1%	15	P:response to oxidative stress; P:negative regulation of growth; P:oxidation-reduction process; P:response to salt stress; P:defense response to bacterium; P:response to light stimulus; F:peroxidase activity; C:plant-type cell wall; F:heme binding; P:response to zinc ion; P:unidimensional cell growth; C:vacuole; P:defense response to fungus; C:plasma membrane; C:apoplast	EC:1.11.1.7
isotig00686	glucan endo- -beta-glucosidase	1032	10	1.11774e-133	86.5%	3	F:glucan endo-1,3-beta-D-glucosidase activity; P:carbohydrate metabolic process; F:cation binding	EC:3.2.1.39
isotig00687	inactive poly	1027	10	2.18668e-81	69.8%	1	F:NAD+ ADP-ribosyltransferase activity
isotig00688	heavy-metal-associated domain-containing protein	1046	10	1.98278e-33	80.8%	5	F:metal ion binding; F:protein tyrosine/serine/threonine phosphatase activity; C:cell wall; P:protein dephosphorylation; P:metal ion transport	-
isotig00689	aspartic proteinase nepenthesin-1	1040	10	1.83331e-150	92.8%	7	C:plant-type cell wall; P:cell wall modification; P:plant-type cell wall organization; F:aspartic-type endopeptidase activity; P:proteolysis; C:membrane; P:response to karrikin	EC:3.4.23.0
isotig00690	cellulose synthase-like protein h1-like	1047	10	3.20817e-100	74.6%	3	F:transferase activity, transferring glycosyl groups; P:cellular process; C:membrane	-
isotig00691	---NA---	1040	0			0	-
isotig00692	1-deoxy-d-xylulose 5-phosphate synthase	1041	10	0.0	96.8%	7	F:metal ion binding; P:chlorophyll biosynthetic process; P:terpenoid biosynthetic process; P:thiamine biosynthetic process; F:1-deoxy-D-xylulose-5-phosphate synthase activity; C:chloroplast; P:1-deoxy-D-xylulose 5-phosphate biosynthetic process	EC:2.2.1.7
isotig00693	acc oxidase 1	1045	10	7.79423e-131	92.3%	2	P:oxidation-reduction process; F:oxidoreductase activity, acting on paired donors, with incorporation or reduction of molecular oxygen, 2-oxoglutarate as one donor, and incorporation of one atom each of oxygen into both donors	EC:1.14.11.0
isotig00694	probable protein phosphatase 2c 25-like	1032	10	1.27356e-101	84.4%	6	C:protein serine/threonine phosphatase complex; F:metal ion binding; F:protein serine/threonine phosphatase activity; P:protein dephosphorylation; C:nucleus; P:abscisic acid mediated signaling pathway	-
isotig00695	carrier protein mitochondrial	1023	10	3.87775e-143	96.1%	5	C:chloroplast envelope; P:purine nucleotide transport; C:mitochondrial inner membrane; C:integral to membrane; F:transporter activity	-
isotig00696	nadph oxidase	1019	10	5.08129e-109	74.0%	6	F:ferric-chelate reductase activity; C:plasma membrane; P:photosynthetic electron transport chain; C:integral to membrane; C:chloroplast; P:response to light stimulus	EC:1.16.1.7
isotig00697	endosomal p24a protein	1007	10	2.57598e-126	87.3%	9	P:methionine biosynthetic process; P:cellular zinc ion homeostasis; C:integral to membrane; C:vacuolar membrane; P:RNA splicing, via endonucleolytic cleavage and ligation; P:cellular copper ion homeostasis; C:Golgi apparatus; C:nucleus; C:plasma membrane	-
isotig00698	glucan endo- -beta-glucosidase	1018	10	1.78534e-80	77.4%	3	P:carbohydrate metabolic process; F:glucan endo-1,3-beta-D-glucosidase activity; F:cation binding	EC:3.2.1.39
isotig00699	phosphoethanolamine n-	1020	10	0.0	92.7%	11	C:cytosol; F:phosphoethanolamine N-methyltransferase activity; P:phosphatidylcholine biosynthetic process; F:glycylpeptide N-tetradecanoyltransferase activity; P:choline biosynthetic process; P:methylation; P:N-terminal protein myristoylation; P:pollen tube growth; P:pollen development; P:pollen tube guidance; P:post-embryonic root development	EC:2.1.1.103; EC:2.3.1.97
isotig00700	dehydrin 2	1023	10	0.733438	73.0%	3	P:response to water stimulus; P:response to stress; P:response to temperature stimulus	-
isotig00701	matr	1020	10	7.9602e-48	94.9%	9	F:oxidoreductase activity; F:RNA-directed DNA polymerase activity; P:RNA-dependent DNA replication; F:RNA binding; P:mRNA processing; C:integral to membrane; C:chloroplast; C:mitochondrion; P:oxidation-reduction process	EC:2.7.7.49
isotig00702	polyadenylate-binding protein 2-like	1017	10	1.27608e-130	89.2%	3	P:response to cadmium ion; F:nucleotide binding; F:RNA binding	-
isotig00703	nac domain ipr003441	1006	10	2.32395e-106	69.9%	3	F:binding; P:biological regulation; P:response to organic substance	-
isotig00704	autoinhibited h+ atpase	1010	10	2.63757e-144	97.6%	9	F:hydrogen-exporting ATPase activity, phosphorylative mechanism; P:response to salt stress; C:integral to membrane; F:metal ion binding; P:ATP catabolic process; P:ATP biosynthetic process; F:ATP binding; P:cation transport; C:plasma membrane	EC:3.6.3.6
isotig00705	squalene monooxygenase	1011	10	3.54638e-157	93.0%	6	P:response to wounding; F:squalene monooxygenase activity; F:flavin adenine dinucleotide binding; C:integral to membrane; P:response to jasmonic acid stimulus; P:oxidation-reduction process	EC:1.14.99.7
isotig00706	cutin deficient 2	998	10	9.11453e-158	92.5%	7	P:root development; P:regulation of transcription, DNA-dependent; F:sequence-specific DNA binding; P:anthocyanin accumulation in tissues in response to UV light; F:sequence-specific DNA binding transcription factor activity; F:DBD domain binding; C:nucleus	-
isotig00707	cohesin subunit	985	10	2.3008e-36	57.0%	1	C:nuclear chromosome
isotig00708	chly_hevbr ame: full=hevamine-a includes: ame: full=chitinase includes: ame: full=lysozyme flags: precursor	1000	10	8.25679e-96	85.8%	11	P:response to light intensity; F:cation binding; F:lysozyme activity; P:chitin catabolic process; P:response to salt stress; P:response to cold; P:response to wounding; P:cellular response to water deprivation; F:chitinase activity; C:vacuole; P:defense response to fungus	EC:3.2.1.17; EC:3.2.1.14
isotig00709	uncharacterized protein loc100254535	991	10	1.37013e-66	79.3%	2	C:nucleus; C:plasma membrane	-
isotig00710	ribosomal protein s10	999	7	1.25774e-38	7.32857e+13	4	F:structural constituent of ribosome; P:translation; C:ribosome; C:intracellular
isotig00711	chitinase-like protein 2	993	10	4.01013e-120	92.8%	38	P:response to fructose stimulus; P:regulation of carbohydrate biosynthetic process; P:response to wounding; C:apoplast; P:coumarin biosynthetic process; P:water transport; P:multidimensional cell growth; F:chitinase activity; F:polysaccharide binding; P:calcium ion transport; P:regulation of meristem growth; P:response to salt stress; P:chitin catabolic process; P:pattern specification process; P…	EC:3.2.1.14
isotig00712	protein time for coffee-like	996	10	1.30469e-71	62.7%	2	P:regulation of circadian rhythm; C:nucleus
isotig00713	chlorophyll a b binding	993	10	1.96148e-128	84.3%	7	C:plastoglobule; C:chloroplast envelope; P:photosynthesis, light harvesting; P:response to blue light; P:response to far red light; P:response to red light; C:chloroplast thylakoid membrane	-
isotig00714	transmembrane 9 superfamily member 4-like	970	10	8.2172e-148	94.3%	5	C:vacuolar membrane; C:integral to membrane; C:plasmodesma; C:Golgi apparatus; C:plasma membrane	-
isotig00715	auxin response factor 6-like	979	10	8.6381e-44	94.7%	6	P:regulation of transcription, DNA-dependent; P:flower development; F:DNA binding; F:protein dimerization activity; P:auxin mediated signaling pathway; C:nucleus	-
isotig00716	tom1-like protein 2-like	969	10	3.49795e-102	80.0%	4	P:intra-Golgi vesicle-mediated transport; C:Golgi stack; F:protein transporter activity; P:intracellular protein transport	-
isotig00717	allene oxide synthase	989	10	7.99726e-130	88.1%	15	F:allene oxide synthase activity; P:oxylipin metabolic process; P:response to jasmonic acid stimulus; P:oxidation-reduction process; P:response to fungus; C:mitochondrion; P:response to wounding; C:chloroplast envelope; F:oxidoreductase activity, acting on paired donors, with incorporation or reduction of molecular oxygen; F:electron carrier activity; F:monooxygenase activity; C:chloroplast thyla…	EC:4.2.1.92
isotig00718	#NAME?	956	10	6.36202e-83	85.8%	13	C:cytoplasm; P:threonine biosynthetic process; P:lysine biosynthetic process via diaminopimelate; F:NAD binding; F:N-acetyl-gamma-glutamyl-phosphate reductase activity; F:aspartate-semialdehyde dehydrogenase activity; F:NADP binding; F:protein dimerization activity; P:methionine biosynthetic process; P:isoleucine biosynthetic process; P:transport; P:oxidation-reduction process; F:transporter acti…	EC:1.2.1.38; EC:1.2.1.11
isotig00719	pectin methylesterase	978	10	2.37787e-102	87.6%	15	P:indoleacetic acid biosynthetic process; F:aspartyl esterase activity; P:cell wall organization; F:pectinesterase activity; P:cell wall modification; C:plant-type cell wall; P:glycine catabolic process; F:enzyme inhibitor activity; P:negative regulation of catalytic activity; P:pectin catabolic process; P:tryptophan catabolic process; C:cytoplasm; P:response to nematode; C:plasma membrane; C:apo…	EC:3.1.1.11
isotig00720	3 chain improved model of plant photosystem i	982	10	1.15163e-104	94.3%	3	C:plastoglobule; P:photosynthesis, light harvesting; C:chloroplast thylakoid membrane	-
isotig00721	light-harvesting complex ii protein lhcb2	981	10	6.04856e-122	96.2%	14	C:photosystem I; P:response to red light; F:chlorophyll binding; C:integral to membrane; F:metal ion binding; P:protein-chromophore linkage; C:chloroplast envelope; P:response to blue light; C:chloroplast thylakoid membrane; C:photosystem II; C:plastoglobule; P:response to far red light; P:photosynthesis, light harvesting; C:plasma membrane	-
isotig00722	abc transporter c family member 2	978	10	3.06979e-142	93.1%	15	P:arsenite transport; P:oxidation-reduction process; F:arsenite-transmembrane transporting ATPase activity; F:xenobiotic-transporting ATPase activity; C:integral to membrane; C:plant-type vacuole; P:ATP catabolic process; F:phytochelatin transmembrane transporter activity; P:phytochelatin transmembrane transport; C:vacuolar membrane; F:ATP binding; F:2-alkenal reductase [NAD(P)] activity; P:respo…	EC:3.6.3.16; EC:3.6.3.44; EC:1.3.1.74
isotig00723	serinc-domain containing protein	968	10	7.51883e-109	92.6%	4	P:protein targeting to vacuole; C:membrane; C:intracellular; P:vesicle-mediated transport	-
isotig00724	60s ribosomal protein l8	977	10	6.87056e-126	98.0%	11	P:translation; F:RNA binding; C:nucleolus; F:structural constituent of ribosome; C:vacuolar membrane; F:protein binding; C:chloroplast; C:cytosolic large ribosomal subunit; C:Golgi apparatus; C:plasma membrane; P:embryo development ending in seed dormancy	-
isotig00725	malate dehydrogenase	979	10	3.87536e-161	94.7%	16	P:oxidation-reduction process; C:mitochondrion; P:rRNA processing; C:chloroplast envelope; P:malate metabolic process; F:malate dehydrogenase (NADP+) activity; C:thylakoid; P:maltose metabolic process; P:starch biosynthetic process; P:plastid organization; F:nucleotide binding; C:chloroplast stroma; P:photosystem II assembly; P:glucosinolate biosynthetic process; P:positive regulation of catalyti…	EC:1.1.1.82
isotig00726	non-specific serine threonine protein kinase	976	10	6.47545e-106	78.5%	24	P:regulation of proton transport; F:blue light photoreceptor activity; P:response to far red light; P:response to sucrose stimulus; P:regulation of stomatal movement; C:vacuole; P:response to red light; P:signal transduction by phosphorylation; P:regulation of transcription, DNA-dependent; P:phototropism; P:negative regulation of anion channel activity by blue light; P:protein autophosphorylation…	EC:2.7.11.13
isotig00727	shaggy-like protein kinase etha (ec -)	968	10	1.34819e-166	96.9%	21	F:protein binding; P:water transport; P:multidimensional cell growth; P:response to salt stress; F:protein tyrosine kinase activity; P:detection of brassinosteroid stimulus; P:root hair elongation; P:hyperosmotic response; P:positive regulation of protein export from nucleus; P:protein autophosphorylation; P:Golgi organization; P:leaf morphogenesis; P:glycolysis; F:protein serine/threonine kinase…	EC:2.7.10.0; EC:2.7.11.0; EC:2.7.11.26
isotig00728	cellulose synthase-like protein h1-like	964	10	9.27628e-99	77.9%	4	F:cellulose synthase (UDP-forming) activity; P:cellulose biosynthetic process; C:integral to membrane; P:cell wall organization	EC:2.4.1.12
isotig00729	ubiquinol-cytochrome c reductase cytochrome c1 subunit	964	10	8.13907e-133	92.3%	17	P:ubiquitin-dependent protein catabolic process; P:pentose-phosphate shunt; P:response to salt stress; P:response to misfolded protein; C:mitochondrial respiratory chain complex III; C:plastid; P:proteasome core complex assembly; C:vacuolar membrane; P:mitochondrial electron transport, ubiquinol to cytochrome c; P:aerobic respiration; F:protein binding; P:glycolysis; F:heme binding; P:photorespir…	-
isotig00730	aconitate cytoplasmic-like	971	10	2.39167e-163	95.0%	16	F:citrate dehydratase activity; P:response to oxidative stress; P:glyoxylate cycle; F:copper ion binding; C:cell wall; C:mitochondrion; P:response to salt stress; F:isocitrate hydro-lyase (cis-aconitate-forming) activity; F:4 iron, 4 sulfur cluster binding; F:ATP binding; P:response to abscisic acid stimulus; P:isocitrate metabolic process; C:chloroplast; P:response to cadmium ion; P:citrate meta…	EC:4.2.1.3
isotig00731	gtp-binding protein sar1a	953	10	1.35158e-70	97.1%	5	F:GTP binding; C:Golgi apparatus; P:vesicle-mediated transport; P:intracellular protein transport; C:endoplasmic reticulum	-
isotig00732	dihydrolipoamide dehydrogenase precursor	950	10	5.16645e-147	95.6%	13	F:copper ion binding; P:oxidation-reduction process; F:zinc ion binding; C:mitochondrial respiratory chain complex I; F:cobalt ion binding; P:response to light stimulus; P:cell redox homeostasis; F:ATP binding; F:flavin adenine dinucleotide binding; F:dihydrolipoyl dehydrogenase activity; C:chloroplast; P:response to cadmium ion; C:apoplast	EC:1.8.1.4
isotig00733	phi-1 protein	956	10	9.00732e-107	80.8%	2	C:plant-type cell wall; P:response to brassinosteroid stimulus	-
isotig00734	uncharacterized protein	962	10	1.2298e-103	86.8%	9	P:cytokinesis by cell plate formation; P:nuclear division; P:histone phosphorylation; P:histone H3-K9 methylation; P:chromatin silencing; P:nucleolus organization; P:cell proliferation; C:cytoplasm; C:nucleus	-
isotig00735	mitogen-activated protein kinase	954	10	3.64e-124	82.7%	15	P:response to wounding; P:response to chitin; P:camalexin biosynthetic process; P:response to bacterium; P:activation of MAPK activity involved in osmosensory signaling pathway; P:regulation of stomatal complex development; P:response to osmotic stress; P:MAPK cascade; F:MAP kinase activity; P:response to cold; P:regulation of stomatal complex patterning; F:ATP binding; P:ovule development; P:res…	EC:2.7.11.24
isotig00736	light-harvesting complex ii protein lhcb2	962	10	1.00138e-121	96.0%	14	C:photosystem I; P:response to red light; F:chlorophyll binding; C:integral to membrane; F:metal ion binding; P:protein-chromophore linkage; C:chloroplast envelope; P:response to blue light; C:chloroplast thylakoid membrane; C:photosystem II; C:plastoglobule; P:response to far red light; P:photosynthesis, light harvesting; C:plasma membrane	-
isotig00737	uncharacterized protein	949	10	9.20445e-93	74.7%	3	C:nucleus; F:protein binding; C:cytosol	-
isotig00738	---NA---	952	0			0	-
isotig00739	dna binding	955	10	3.02501e-54	74.6%	6	P:response to salt stress; P:response to light stimulus; P:response to chemical stimulus; P:signal transduction; P:cellular response to abiotic stimulus; P:transcription, DNA-dependent	-
isotig00740	mitochondrial carnitine acylcarnitine carrier-like isoform 1	955	10	8.34877e-122	93.3%	4	C:integral to membrane; P:ornithine transport; C:mitochondrion; C:chloroplast	-
isotig00741	cytochrome c biogenesis fn	954	10	2.34846e-139	92.8%	6	P:respiratory chain complex IV assembly; P:cytochrome complex assembly; P:heme transport; F:heme transporter activity; C:membrane; C:mitochondrion	-
isotig00742	ethylene-responsive element binding factor 4	940	10	4.03005e-11	64.3%	4	P:regulation of transcription, DNA-dependent; F:DNA binding; F:sequence-specific DNA binding transcription factor activity; C:nucleus	-
isotig00743	ribosomal protein s3	950	1	8.66185	88.0%	5	F:structural constituent of ribosome; C:small ribosomal subunit; C:chloroplast; P:translation; F:rRNA binding	-
isotig00744	pip protein	948	10	3.35479e-122	95.9%	8	C:vacuole; C:anchored to plasma membrane; P:water transport; P:transmembrane transport; P:response to abscisic acid stimulus; C:integral to membrane; C:nucleus; F:transporter activity	-
isotig00745	auxin response factor 6-like	942	10	3.54151e-109	87.0%	6	P:regulation of transcription, DNA-dependent; P:flower development; F:DNA binding; F:protein dimerization activity; P:auxin mediated signaling pathway; C:nucleus	-
isotig00746	transcription factor tcp7-like	938	10	2.42377e-45	68.6%	1	P:regulation of transcription, DNA-dependent	-
isotig00747	60s ribosomal protein l7a	941	10	2.64898e-95	97.9%	8	C:nucleolus; F:structural constituent of ribosome; C:plasma membrane; P:ribosome biogenesis; C:cytosolic large ribosomal subunit; C:chloroplast; F:zinc ion binding; P:translation	-
isotig00748	rna polymerase beta partial	940	10	1.36787e-142	92.0%	4	F:DNA-directed RNA polymerase activity; P:transcription, DNA-dependent; F:DNA binding; C:chloroplast	EC:2.7.7.6
isotig00749	40s ribosomal protein	943	10	2.90175e-126	98.6%	7	C:nucleolus; C:cytosolic ribosome; F:structural constituent of ribosome; C:plasma membrane; F:RNA binding; C:chloroplast; P:translation	-
isotig00750	calcineurin b-like protein-interacting protein kinase	939	10	8.24675e-94	86.3%	5	F:calmodulin-dependent protein kinase activity; P:defense response to fungus; P:protein phosphorylation; F:ATP binding; P:signal transduction	EC:2.7.11.17
isotig00751	eukaryotic translation elongation	943	10	3.31427e-146	97.1%	5	F:translation elongation factor activity; P:translational elongation; P:GTP catabolic process; F:GTPase activity; F:GTP binding	-
isotig00752	uncharacterized protein loc100250554	931	10	3.53215e-85	87.8%	0	-
isotig00753	transcriptional corepressor seuss-like	936	10	1.11931e-37	74.3%	2	F:binding; P:gynoecium development	-
isotig00754	cyclic nucleotide-gated ion channel 2	912	10	3.0797e-110	87.7%	10	P:transmembrane transport; F:calmodulin binding; P:plant-type hypersensitive response; C:integral to membrane; F:calcium channel activity; F:cyclic nucleotide binding; P:nitric oxide mediated signal transduction; F:intracellular cAMP activated cation channel activity; P:ion transport; F:inward rectifier potassium channel activity	-
isotig00755	26s protease regulatory subunit 6b homolog	934	10	7.99326e-145	99.8%	10	C:cytoplasm; F:peptidase activity; C:proteasome regulatory particle, base subcomplex; P:protein catabolic process; C:cell wall; F:ATP binding; F:microtubule-severing ATPase activity; P:proteolysis; C:membrane; C:nucleus	EC:3.6.4.3
isotig00756	transport inhibitor response 1	934	10	1.69005e-94	94.8%	16	P:methionine biosynthetic process; P:primary root development; P:stomatal complex morphogenesis; P:photoperiodism, flowering; F:inositol hexakisphosphate binding; F:auxin binding; C:vacuolar membrane; F:ubiquitin-protein ligase activity; P:cellular response to nitrate; P:stamen development; P:response to molecule of bacterial origin; P:pollen maturation; P:lateral root development; P:RNA splicing…	EC:6.3.2.19
isotig00757	uncharacterized membrane	930	10	3.34484e-96	83.6%	5	C:chloroplast envelope; C:plasmodesma; C:cytoplasmic membrane-bounded vesicle; C:plasma membrane; C:vacuolar membrane	-
isotig00758	patellin 1	905	10	3.11144e-122	84.2%	4	C:intracellular; P:transport; C:integral to membrane; F:transporter activity	-
isotig00759	probable adp-ribosylation factor gtpase-activating protein agd14-like	915	10	1.14096e-71	69.6%	4	P:protein autophosphorylation; F:binding; F:protein serine/threonine kinase activity; C:plasma membrane	EC:2.7.11.0
isotig00760	---NA---	920	0			0	-
isotig00761	regulatory particle triple-a 1a	905	10	1.2456e-131	92.9%	7	C:proteasome regulatory particle, base subcomplex; F:ATPase activity; C:plasma membrane; P:ubiquitin-dependent protein catabolic process; F:ATP binding; C:nucleus; C:cytosol	EC:3.6.1.3
isotig00762	retrotransposon gag protein	915	10	3.15331e-37	65.6%	3	F:nucleic acid binding; F:zinc ion binding; P:DNA metabolic process	-
isotig00763	zinc finger	919	10	5.96553e-44	62.9%	3	P:response to abiotic stimulus; P:response to stress; P:response to chemical stimulus	-
isotig00764	cytochrome p450 ent-kaurenoic acid oxidase	919	10	1.31259e-67	73.8%	7	F:monooxygenase activity; F:iron ion binding; C:intracellular membrane-bounded organelle; C:cytoplasmic part; F:oxidoreductase activity, acting on paired donors, with incorporation or reduction of molecular oxygen; P:cellular process; P:oxidation-reduction process	-
isotig00765	elongation factor 1-	919	10	1.8794e-114	99.2%	7	F:translation elongation factor activity; F:sulfate adenylyltransferase (ATP) activity; P:translational elongation; P:GTP catabolic process; F:GTPase activity; C:cytoplasm; F:GTP binding	EC:2.7.7.4
isotig00766	sy121_arath ame: full=syntaxin-121 short= 121 ame: full=syntaxin-related protein at-syr1	915	10	2.88375e-115	91.2%	47	P:detection of biotic stimulus; P:response to wounding; C:trans-Golgi network; P:response to external stimulus; P:regulation of stomatal movement; P:jasmonic acid mediated signaling pathway; P:salicylic acid biosynthetic process; P:regulation of protein dephosphorylation; P:nucleotide transport; P:systemic acquired resistance, salicylic acid mediated signaling pathway; P:response to water depriva…	-
isotig00767	mitochondrial-processing peptidase subunit alpha-like	905	10	7.38928e-59	60.7%	2	C:mitochondrial envelope; C:membrane	-
isotig00768	ribulose bisphosphate carboxylase oxygenase activase chloroplast	916	10	5.60193e-127	93.0%	14	C:cell wall; F:ribulose-1,5-bisphosphate carboxylase/oxygenase activator activity; F:ADP binding; P:defense response to bacterium; P:response to light stimulus; P:response to cold; C:chloroplast envelope; F:ATP binding; C:chloroplast thylakoid membrane; C:plastoglobule; P:regulation of catalytic activity; C:nucleus; C:stromule; C:apoplast	-
isotig00769	probable -trehalose-phosphate synthase	914	10	2.37008e-72	91.1%	3	F:alpha,alpha-trehalose-phosphate synthase (UDP-forming) activity; F:trehalose-phosphatase activity; P:trehalose biosynthetic process	EC:2.4.1.15; EC:3.1.3.12
isotig00770	40s ribosomal protein s2-4-like	899	10	5.4973e-112	96.1%	8	C:nucleolus; F:structural constituent of ribosome; C:plasma membrane; F:RNA binding; C:cell wall; C:cytosolic small ribosomal subunit; C:chloroplast; P:translation	-
isotig00771	protein frigida-like	897	10	7.91181e-102	83.7%	0	-
isotig00772	fructose- - chloroplastic-like	912	10	7.24269e-143	97.3%	11	P:reductive pentose-phosphate cycle; F:metal ion binding; P:photosynthetic electron transport in photosystem I; P:response to cold; F:fructose 1,6-bisphosphate 1-phosphatase activity; P:sucrose metabolic process; C:chloroplast stroma; F:2-alkenal reductase [NAD(P)] activity; P:fructose 1,6-bisphosphate metabolic process; C:stromule; C:apoplast	EC:3.1.3.11; EC:1.3.1.74
isotig00773	40s ribosomal protein sa	909	10	7.54128e-93	97.9%	9	P:translation; C:small ribosomal subunit; P:response to salt stress; F:structural constituent of ribosome; C:chloroplast; P:mature ribosome assembly; C:cytosolic ribosome; C:nucleus; C:plasma membrane	-
isotig00774	elongation factor ts family protein	891	10	5.72394e-100	79.0%	12	F:translation elongation factor activity; P:hydrogen peroxide catabolic process; P:chloroplast relocation; P:isopentenyl diphosphate biosynthetic process, methylerythritol 4-phosphate pathway; C:chloroplast envelope; P:carotenoid biosynthetic process; P:translational elongation; P:thylakoid membrane organization; P:ncRNA metabolic process; C:chloroplast stroma; P:response to cadmium ion; P:embryo…	-
isotig00775	ribosomal protein l10	907	10	8.99806e-66	92.8%	2	C:ribosome; C:mitochondrion	-
isotig00776	aspartyl protease family protein	908	10	2.22349e-99	83.3%	5	P:response to water deprivation; F:aspartic-type endopeptidase activity; P:response to abscisic acid stimulus; P:proteolysis; C:endoplasmic reticulum	EC:3.4.23.0
isotig00777	protein disulfide	909	10	6.36886e-107	93.0%	14	P:pollen tube development; P:glycerol ether metabolic process; F:protein disulfide isomerase activity; P:response to endoplasmic reticulum stress; P:cell redox homeostasis; P:embryo sac development; F:electron carrier activity; C:plant-type cell wall; P:response to cadmium ion; P:double fertilization forming a zygote and endosperm; C:endoplasmic reticulum; F:protein disulfide oxidoreductase activ…	EC:5.3.4.1
isotig00048	ribulose bisphosphate carboxylase oxygenase activase chloroplastic-like	1556	10	0.0	94.0%	16	C:cell wall; P:response to jasmonic acid stimulus; F:ribulose-1,5-bisphosphate carboxylase/oxygenase activator activity; F:ADP binding; P:defense response to bacterium; P:response to light stimulus; P:response to cold; C:chloroplast envelope; F:ATP binding; C:chloroplast thylakoid membrane; P:leaf senescence; C:plastoglobule; P:regulation of catalytic activity; C:nucleus; C:stromule; C:apoplast	-
isotig00049	ribulose bisphosphate carboxylase oxygenase activase chloroplastic-like	1556	10	0.0	94.0%	16	C:cell wall; P:response to jasmonic acid stimulus; F:ribulose-1,5-bisphosphate carboxylase/oxygenase activator activity; F:ADP binding; P:defense response to bacterium; P:response to light stimulus; P:response to cold; C:chloroplast envelope; F:ATP binding; C:chloroplast thylakoid membrane; P:leaf senescence; C:plastoglobule; P:regulation of catalytic activity; C:nucleus; C:stromule; C:apoplast	-
isotig00050	cellulose synthase	3520	10	0.0	90.6%	10	P:primary cell wall biogenesis; P:cell growth; F:zinc ion binding; C:integral to membrane; P:cellulose biosynthetic process; P:cell wall organization; F:cellulose synthase (UDP-forming) activity; P:seed coat development; P:cortical microtubule organization; C:Golgi apparatus	EC:2.4.1.12
isotig00051	cellulose synthase	3486	10	0.0	91.8%	10	P:primary cell wall biogenesis; P:cell growth; F:zinc ion binding; C:integral to membrane; P:cellulose biosynthetic process; P:cell wall organization; F:cellulose synthase (UDP-forming) activity; P:seed coat development; P:cortical microtubule organization; C:Golgi apparatus	EC:2.4.1.12
isotig00052	cellulose synthase a catalytic subunit 6	2314	10	0.0	89.7%	10	P:primary cell wall biogenesis; P:cell growth; F:zinc ion binding; C:integral to membrane; P:cellulose biosynthetic process; P:cell wall organization; F:cellulose synthase (UDP-forming) activity; P:seed coat development; P:cortical microtubule organization; C:Golgi apparatus	EC:2.4.1.12
isotig00053	cellulose synthase	1596	10	0.0	92.2%	10	P:primary cell wall biogenesis; P:cell growth; F:zinc ion binding; C:integral to membrane; P:cellulose biosynthetic process; P:cell wall organization; F:cellulose synthase (UDP-forming) activity; P:seed coat development; P:cortical microtubule organization; C:Golgi apparatus	EC:2.4.1.12
isotig00054	atp synthase cf1 alpha subunit	7951	10	0.0	97.6%	11	F:DNA-directed RNA polymerase activity; C:proton-transporting ATP synthase complex, catalytic core F(1); P:plasma membrane ATP synthesis coupled proton transport; F:proton-transporting ATP synthase activity, rotational mechanism; F:DNA binding; F:ATP binding; F:proton-transporting ATPase activity, rotational mechanism; C:chloroplast thylakoid membrane; F:ribonucleoside binding; P:transcription, D…	EC:2.7.7.6
isotig00055	atp synthase cf1 alpha subunit	7915	10	0.0	97.6%	11	F:DNA-directed RNA polymerase activity; C:proton-transporting ATP synthase complex, catalytic core F(1); P:plasma membrane ATP synthesis coupled proton transport; F:proton-transporting ATP synthase activity, rotational mechanism; F:DNA binding; F:ATP binding; F:proton-transporting ATPase activity, rotational mechanism; C:chloroplast thylakoid membrane; F:ribonucleoside binding; P:transcription, D…	EC:2.7.7.6
isotig00056	atp synthase cf1 alpha subunit	7182	10	0.0	97.6%	11	F:DNA-directed RNA polymerase activity; C:proton-transporting ATP synthase complex, catalytic core F(1); P:plasma membrane ATP synthesis coupled proton transport; F:proton-transporting ATP synthase activity, rotational mechanism; F:DNA binding; F:ATP binding; F:proton-transporting ATPase activity, rotational mechanism; C:chloroplast thylakoid membrane; F:ribonucleoside binding; P:transcription, D…	EC:2.7.7.6
isotig00057	atp synthase cf1 alpha subunit	7146	10	0.0	97.6%	11	F:DNA-directed RNA polymerase activity; C:proton-transporting ATP synthase complex, catalytic core F(1); P:plasma membrane ATP synthesis coupled proton transport; F:proton-transporting ATP synthase activity, rotational mechanism; F:DNA binding; F:ATP binding; F:proton-transporting ATPase activity, rotational mechanism; C:chloroplast thylakoid membrane; F:ribonucleoside binding; P:transcription, D…	EC:2.7.7.6
isotig00778	bel1-like homeodomain protein 1-like	905	10	7.50952e-76	81.7%	4	F:sequence-specific DNA binding transcription factor activity; F:sequence-specific DNA binding; C:nucleus; P:regulation of transcription, DNA-dependent	-
isotig00779	uncharacterized protein loc100242863	900	10	4.29792e-39	63.7%	0	-
isotig00780	3 -n-debenzoyl-2 -deoxytaxol n-	901	10	4.60703e-49	58.3%	1	F:transferase activity	-
isotig00781	cysteine proteinase rd19a-like	895	10	1.99931e-127	92.2%	7	P:defense response to bacterium; C:vacuole; P:response to desiccation; P:proteolysis; C:nucleus; P:response to salt stress; F:cysteine-type peptidase activity	-
isotig00782	abc transporter c family protein	878	10	8.95655e-109	96.3%	20	F:folic acid transporter activity; P:stomatal movement; P:oxidation-reduction process; P:response to endoplasmic reticulum stress; P:response to water deprivation; C:integral to membrane; F:ATPase activity, coupled to transmembrane movement of substances; P:drug transmembrane transport; C:plant-type vacuole; C:plasmodesma; P:response to wounding; P:ATP catabolic process; P:systemic acquired resis…	EC:1.3.1.74
isotig00783	tetratricopeptide repeat domain-containing protein	889	10	1.13821e-121	97.2%	1	C:plasma membrane	-
isotig00784	hypothetical protein OsJ_02036 [Oryza sativa Japonica Group]	897	1	2372.45	88.0%	0	-
isotig00785	6-phosphogluconate dehydrogenase	871	10	1.2065e-120	93.7%	5	F:NADP binding; C:peroxisome; P:pentose-phosphate shunt; F:phosphogluconate dehydrogenase (decarboxylating) activity; P:response to salt stress	EC:1.1.1.44
isotig00786	hyoscyamine 6-	896	10	2.86004e-43	62.0%	1	F:oxidoreductase activity	-
isotig00787	light-harvesting complex ii protein lhcb6	889	10	1.63234e-96	97.3%	9	C:plastoglobule; C:chloroplast envelope; P:photosynthesis, light harvesting; C:photosystem II; P:protein-chromophore linkage; F:chlorophyll binding; P:nonphotochemical quenching; C:integral to membrane; C:chloroplast thylakoid membrane	-
isotig00788	nadph-ferrihemoprotein reductase	880	10	2.02083e-86	78.0%	21	P:indole glucosinolate biosynthetic process; F:kinase activity; P:tryptophan biosynthetic process; P:cellular response to sulfur starvation; F:NADPH-hemoprotein reductase activity; P:response to jasmonic acid stimulus; C:endoplasmic reticulum membrane; P:phenylpropanoid metabolic process; P:response to reactive oxygen species; C:cytosol; F:iron ion binding; F:DNA binding; P:ER to Golgi vesicle-me…	EC:1.6.2.4
isotig00789	gtp-binding protein	887	10	7.41605e-36	83.3%	4	F:GTP binding; C:integral to membrane; P:ferrous iron transport; F:ferrous iron transmembrane transporter activity	-
isotig00790	elongation factor	867	10	7.44948e-111	90.0%	12	F:translation elongation factor activity; P:hydrogen peroxide catabolic process; P:chloroplast relocation; P:isopentenyl diphosphate biosynthetic process, methylerythritol 4-phosphate pathway; C:chloroplast envelope; P:carotenoid biosynthetic process; P:translational elongation; P:thylakoid membrane organization; P:ncRNA metabolic process; C:chloroplast stroma; P:response to cadmium ion; P:embryo…	-
isotig00791	atp adp translocator	882	10	1.26434e-112	98.1%	10	C:nucleolus; C:chloroplast envelope; C:vacuole; P:purine nucleotide transport; C:mitochondrial inner membrane; F:copper ion binding; C:plasma membrane; C:cell wall; C:integral to membrane; F:transporter activity	-
isotig00792	40s ribosomal protein	880	10	4.82684e-96	97.8%	7	C:nucleolus; C:cytosolic ribosome; F:structural constituent of ribosome; C:plasma membrane; P:growth; C:chloroplast; P:translation	-
isotig00793	auxin-responsive protein iaa14-like isoform 1	860	10	1.10467e-89	83.0%	12	P:lateral root morphogenesis; P:response to jasmonic acid stimulus; P:regulation of translation; P:response to water deprivation; P:response to light stimulus; P:regulation of transcription, DNA-dependent; P:response to wounding; C:plastid; F:protein dimerization activity; P:gravitropism; P:auxin mediated signaling pathway; C:nucleus	-
isotig00794	gras family transcription factor	877	10	6.62617e-114	83.0%	2	P:response to chitin; P:regulation of transcription, DNA-dependent	-
isotig00795	oxygen-evolving enhancer protein chloroplast	880	10	3.9486e-98	92.8%	13	C:extrinsic to membrane; C:thylakoid lumen; F:poly(U) RNA binding; P:oxidation-reduction process; F:calcium ion binding; P:defense response to bacterium; C:chloroplast envelope; C:chloroplast thylakoid membrane; C:chloroplast stroma; F:2-alkenal reductase [NAD(P)] activity; P:photosynthesis; C:oxygen evolving complex; C:apoplast	EC:1.3.1.74
isotig00796	protein tify 10b	879	10	9.87315e-25	55.1%	0	-
isotig00797	dehydration-responsive protein rd22	886	10	5.20491e-106	87.7%	3	P:response to desiccation; P:response to abscisic acid stimulus; P:response to salt stress	-
isotig00798	omega-6 fatty acid desaturase	883	10	1.77862e-106	91.7%	7	C:endoplasmic reticulum membrane; F:delta12-fatty acid dehydrogenase activity; F:oxidoreductase activity, acting on paired donors, with oxidation of a pair of donors resulting in the reduction of molecular oxygen to two molecules of water; F:omega-6 fatty acid desaturase activity; P:unsaturated fatty acid biosynthetic process; C:integral to membrane; P:oxidation-reduction process	EC:1.14.99.33; EC:1.14.19.0
isotig00799	ubiquitin-protein ligase 1	871	10	1.64608e-84	78.5%	8	P:protein ubiquitination involved in ubiquitin-dependent protein catabolic process; C:plasmodesma; F:ubiquitin-protein ligase activity; C:membrane; C:nucleus; C:cytosol; C:mitochondrion; C:ubiquitin ligase complex	EC:6.3.2.19
isotig00800	at4g01050 f2n1_31	881	10	3.69578e-96	81.5%	47	P:coenzyme biosynthetic process; P:jasmonic acid biosynthetic process; P:salicylic acid biosynthetic process; P:response to red light; P:regulation of plant-type hypersensitive response; P:response to chitin; P:response to glucose stimulus; P:cysteine biosynthetic process; P:negative regulation of defense response; P:aromatic amino acid family metabolic process; P:defense response to fungus; F:hy…	EC:3.2.1.0
isotig00801	esterase lipase thioesterase family protein	881	10	1.30839e-109	79.8%	5	C:membrane; C:plasmodesma; C:vacuole; C:plant-type cell wall; F:catalytic activity	-
isotig00802	protein notum homolog	881	10	1.31143e-101	88.7%	0	-
isotig00803	heterogeneous nuclear ribonucleoprotein d0	861	10	6.54573e-74	83.8%	4	F:nucleic acid binding; P:cellular process; C:ribonucleoprotein complex; F:nucleotide binding	-
isotig00804	elongation factor 1-delta 1	881	10	3.73022e-64	89.3%	9	C:cytosol; F:translation elongation factor activity; C:eukaryotic translation elongation factor 1 complex; P:plant-type cell wall assembly; P:translational elongation; P:lignin metabolic process; P:regulation of cellulose biosynthetic process; P:response to cadmium ion; C:plasma membrane	-
isotig00805	nadp-dependent alkenal double bond reductase p2	881	10	8.77619e-106	87.5%	13	P:response to oxidative stress; C:cytosol; P:oxidation-reduction process; F:zinc ion binding; P:actin cytoskeleton organization; P:pollen tube growth; F:nucleotide binding; F:2-alkenal reductase [NAD(P)] activity; P:response to cadmium ion; P:actin filament-based movement; P:plant-type cell wall modification; C:nucleus; C:plasma membrane	EC:1.3.1.74
isotig00806	uncharacterized protein loc100263765	880	10	6.93768e-111	81.7%	5	P:Golgi vesicle transport; P:membrane fusion; C:intracellular; P:methylation; F:methyltransferase activity	EC:2.1.1.0
isotig00807	prolyl-trna synthetase	874	10	1.54435e-82	86.9%	6	F:proline-tRNA ligase activity; P:prolyl-tRNA aminoacylation; C:plasmodesma; F:ATP binding; C:membrane; C:cytosol	EC:6.1.1.15
isotig00808	myosin-like protein	867	10	5.56176e-81	76.3%	1	C:plasmodesma	-
isotig00809	triosphosphate isomerase-like protein type ii	881	10	3.06355e-98	94.1%	15	F:copper ion binding; C:cell wall; C:mitochondrion; P:pentose-phosphate shunt; P:response to salt stress; P:cellular carbohydrate metabolic process; F:triose-phosphate isomerase activity; P:glycolysis; C:chloroplast stroma; P:gluconeogenesis; P:response to zinc ion; C:vacuole; P:response to cadmium ion; C:plasma membrane; C:apoplast	EC:5.3.1.1
isotig00810	chlorophyll a b binding	877	10	1.6283e-120	94.7%	3	C:membrane; P:photosynthesis, light harvesting; C:chloroplast	-
isotig00811	alcohol dehydrogenase 1	879	10	3.23242e-106	90.6%	4	F:nucleotide binding; P:oxidation-reduction process; F:zinc ion binding; F:alcohol dehydrogenase (NAD) activity	EC:1.1.1.1
isotig00812	at3g60900 t4c21_310	861	10	7.99038e-56	75.3%	1	C:anchored to plasma membrane	-
isotig00813	sec14 cytosolic factor	868	10	5.52996e-102	97.4%	4	C:intracellular; P:transport; C:plasma membrane; F:transporter activity	-
isotig00814	small nuclear ribonucleoprotein-associated	874	10	1.89551e-36	85.0%	4	C:nucleolus; F:RNA binding; C:ribonucleoprotein complex; C:Cajal body	-
isotig00815	14-3-3 protein	861	10	4.06212e-108	92.9%	9	C:vacuole; F:protein domain specific binding; P:response to cadmium ion; C:plasma membrane; C:chloroplast; C:nucleus; C:cytosol; C:apoplast; P:brassinosteroid mediated signaling pathway	-
isotig00816	pyruvate kinase	868	10	1.88258e-124	94.6%	9	C:cytoplasm; F:pyruvate kinase activity; P:response to cadmium ion; C:plasma membrane; P:phosphorylation; F:potassium ion binding; F:ATP binding; F:magnesium ion binding; P:glycolysis	EC:2.7.1.40
isotig00817	mitochondrial translational initiation	870	10	9.0395e-34	66.7%	12	P:regulation of proton transport; P:translational initiation; C:chloroplast envelope; F:nucleotide binding; P:isopentenyl diphosphate biosynthetic process, methylerythritol 4-phosphate pathway; P:chloroplast relocation; F:translation initiation factor activity; P:protein autophosphorylation; C:chloroplast stroma; P:ncRNA metabolic process; P:transcription from plastid promoter; P:thylakoid membra…	-
isotig00818	blue-light photoreceptor phr2-like	871	10	2.8507e-125	90.5%	3	P:DNA repair; F:receptor activity; F:deoxyribodipyrimidine photo-lyase activity	EC:4.1.99.3
isotig00819	uncharacterized protein	858	10	6.67507e-81	66.7%	2	F:molecular_function; P:biological_process
isotig00820	calnexin homolog	864	10	3.10136e-59	89.5%	14	C:microsome; P:protein folding; C:plant-type cell wall; P:response to high light intensity; P:response to endoplasmic reticulum stress; C:plasma membrane; C:vacuolar membrane; F:calcium ion binding; P:response to hydrogen peroxide; F:unfolded protein binding; C:chloroplast; C:endoplasmic reticulum; P:response to heat; C:mitochondrion	-
isotig00821	probable galactinol--sucrose galactosyltransferase 2-like	847	10	1.72928e-86	81.2%	3	P:metabolic process; F:galactinol-raffinose galactosyltransferase activity; F:binding	EC:2.4.1.67
isotig00822	uncharacterized protein loc100794223 isoform 2	861	10	3.02229e-71	87.4%	0	-
isotig00823	translation initiation	852	10	1.75767e-112	94.4%	4	C:membrane; P:RNA metabolic process; P:translational initiation; F:translation initiation factor activity	-
isotig00824	glucan endo- -beta-glucosidase	839	10	2.47538e-73	75.6%	4	F:hydrolase activity, hydrolyzing O-glycosyl compounds; P:carbohydrate metabolic process; C:cytoplasmic membrane-bounded vesicle; F:cation binding	EC:3.2.1.0
isotig00825	coatomer subunit delta	851	10	9.18156e-89	86.6%	3	C:clathrin adaptor complex; P:vesicle-mediated transport; P:intracellular protein transport	-
isotig00826	uncharacterized protein	865	10	2.76027e-80	73.1%	2	F:molecular_function; P:biological_process
isotig00827	neutral alpha-glucosidase ab	865	10	2.90161e-138	91.6%	8	P:cellulose biosynthetic process; P:defense response to bacterium; F:glucan 1,3-alpha-glucosidase activity; P:unidimensional cell growth; C:chloroplast; P:response to cadmium ion; F:carbohydrate binding; C:endoplasmic reticulum	EC:3.2.1.84
isotig00828	atp-binding cassette	846	10	1.10868e-82	79.2%	8	P:response to ozone; F:heme-transporting ATPase activity; F:organic phosphonate transmembrane-transporting ATPase activity; P:ATP catabolic process; P:lead ion transport; F:ATP binding; P:abscisic acid transport; C:plasma membrane	EC:3.6.3.41; EC:3.6.3.28
isotig00829	endonuclease or glycosyl hydrolase	849	10	2.10363e-85	72.0%	4	C:peroxisome; F:molecular_function; P:biological_process; C:cellular_component
isotig00830	vq motif-containing protein	860	10	2.66614e-43	63.3%	0	-
isotig00831	digalactosyldiacylglycerol synthase 1	851	10	6.71508e-132	90.6%	7	F:digalactosyldiacylglycerol synthase activity; C:mitochondrion; P:galactolipid biosynthetic process; P:nodulation; C:peribacteroid membrane; F:galactolipid galactosyltransferase activity; C:chloroplast outer membrane	EC:2.4.1.241; EC:2.4.1.184
isotig00832	20 kda chloroplastic	859	10	4.974e-98	91.7%	10	F:copper ion binding; C:mitochondrion; P:protein folding; P:response to cold; C:chloroplast envelope; F:ATP binding; C:chloroplast thylakoid membrane; C:chloroplast stroma; P:response to cadmium ion; C:apoplast	-
isotig00833	---NA---	852	0			0	-
isotig00834	97 kda heat shock	856	10	4.72466e-130	94.7%	10	P:protein folding; P:response to cadmium ion; C:plasma membrane; C:cell wall; F:ATP binding; F:2-alkenal reductase [NAD(P)] activity; C:nucleus; C:cytosol; P:response to heat; P:oxidation-reduction process	EC:1.3.1.74
isotig00835	phosphoglycerate kinase	850	10	5.32068e-129	95.2%	8	C:cytoplasm; F:phosphoglycerate kinase activity; C:plasma membrane; P:phosphorylation; F:ATP binding; P:glycolysis; C:nucleus; C:apoplast	EC:2.7.2.3
isotig00836	endoglucanase 25	848	10	1.46607e-111	90.9%	3	F:transferase activity; P:carbohydrate metabolic process; F:cellulase activity	EC:3.2.1.4
isotig00837	ethylene insensitive 3 class transcription factor	849	10	2.96869e-132	88.2%	3	F:sequence-specific DNA binding transcription factor activity; C:nucleus; P:regulation of transcription, DNA-dependent	-
isotig00838	eukaryotic translation initiation factor 3	855	10	2.50417e-102	82.3%	7	F:translation initiation factor activity; P:translational initiation; P:mRNA modification; P:phosphatidylglycerol biosynthetic process; P:stomatal complex morphogenesis; P:isopentenyl diphosphate biosynthetic process, methylerythritol 4-phosphate pathway; P:response to abscisic acid stimulus	-
isotig00839	auxin-responsive protein	850	10	5.5832e-78	84.1%	6	P:regulation of translation; P:regulation of transcription, DNA-dependent; C:plastid; F:protein dimerization activity; P:auxin mediated signaling pathway; C:nucleus	-
isotig00840	dihydroflavonol-4-reductase isoform 1	852	10	9.55954e-52	76.9%	6	C:cytoplasm; P:flavonoid biosynthetic process; F:oxidoreductase activity; P:regulation of brassinosteroid biosynthetic process; F:coenzyme binding; F:nucleotide binding	-
isotig00841	acetyl- carboxylase 1-like	852	10	4.19632e-143	97.0%	5	P:fatty acid biosynthetic process; F:metal ion binding; F:ATP binding; F:biotin carboxylase activity; F:acetyl-CoA carboxylase activity	EC:6.3.4.14; EC:6.4.1.2
isotig00842	disease resistance protein rga4-like	845	10	1.49215e-36	60.6%	2	P:defense response; F:ADP binding
isotig00843	14-3-3 protein	833	10	2.63752e-117	97.6%	1	F:protein domain specific binding	-
isotig00844	elongation factor 1-	850	10	2.12324e-53	87.7%	5	P:defense response to bacterium; F:translation elongation factor activity; C:eukaryotic translation elongation factor 1 complex; C:apoplast; P:translational elongation	-
isotig00845	ribulose-phosphate 3- chloroplastic-like	852	10	2.8585e-108	96.3%	13	P:reductive pentose-phosphate cycle; P:pentose-phosphate shunt; P:defense response to bacterium; F:metal ion binding; P:response to cold; C:chloroplast envelope; C:chloroplast thylakoid membrane; C:chloroplast stroma; F:ribulose-phosphate 3-epimerase activity; P:response to nematode; P:embryo development ending in seed dormancy; C:stromule; C:apoplast	EC:5.1.3.1
isotig00846	t-complex protein 1 subunit beta	839	10	1.3227e-125	95.5%	12	C:cytosol; C:cell wall; P:proteasomal protein catabolic process; P:protein folding; P:rRNA processing; P:cytoskeleton organization; P:cell wall modification; F:ATP binding; C:anchored to plasma membrane; P:gluconeogenesis; F:unfolded protein binding; P:plant-type cell wall organization	-
isotig00847	light harvesting chlorophyll a b-binding protein	851	10	5.69786e-123	95.8%	15	C:photosystem I; P:response to red light; F:chlorophyll binding; C:mitochondrion; C:integral to membrane; F:metal ion binding; P:protein-chromophore linkage; C:chloroplast envelope; P:response to blue light; C:chloroplast thylakoid membrane; C:photosystem II; C:plastoglobule; P:response to far red light; P:photosynthesis, light harvesting; C:apoplast	-
isotig00848	iaa-amino acid hydrolase ilr1-like 4	841	10	9.21796e-126	92.7%	8	F:IAA-Ala conjugate hydrolase activity; P:response to wounding; F:hippurate hydrolase activity; C:plasma membrane; P:proteolysis; P:regulation of systemic acquired resistance; C:endoplasmic reticulum; F:metallopeptidase activity	EC:3.5.1.32
isotig00849	uncharacterized protein loc100817630	838	10	7.24502e-14	80.0%	0	-
isotig00850	s-adenosylmethionine synthase-like isoform 1	847	10	1.6971e-136	97.4%	6	F:methionine adenosyltransferase activity; F:metal ion binding; P:S-adenosylmethionine biosynthetic process; P:one-carbon metabolic process; F:ATP binding; C:cytoplasm	EC:2.5.1.6
isotig00851	60s ribosomal protein l10a	843	10	2.70722e-81	95.1%	11	P:RNA methylation; P:translation; P:adaxial/abaxial pattern specification; F:RNA binding; P:post-embryonic organ development; C:nucleolus; C:plasmodesma; P:rRNA processing; F:structural constituent of ribosome; C:cytosolic large ribosomal subunit; C:plasma membrane	-
isotig00852	cinnamyl alcohol dehydrogenase-related protein	843	10	2.99295e-92	86.7%	4	F:mannitol dehydrogenase activity; F:nucleotide binding; P:oxidation-reduction process; F:zinc ion binding	EC:1.1.1.255
isotig00853	protein	838	10	5.49645e-139	94.3%	9	P:plant-type hypersensitive response; F:calcium ion binding; P:protein folding; P:defense response to bacterium; P:calcium ion homeostasis; P:defense response signaling pathway, resistance gene-independent; F:unfolded protein binding; C:endoplasmic reticulum membrane; P:anthocyanin-containing compound metabolic process	-
isotig00854	transcription factor	836	10	1.21948e-37	79.2%	0	-
isotig00855	pyruvate dehydrogenase e1 alpha subunit	841	10	4.48647e-136	94.7%	13	C:cytosol; P:response to glucose stimulus; F:pyruvate dehydrogenase (acetyl-transferring) activity; P:response to sucrose stimulus; F:zinc ion binding; P:response to fructose stimulus; P:pentose-phosphate shunt; P:response to salt stress; F:cobalt ion binding; P:glycolysis; C:mitochondrial matrix; P:response to cadmium ion; C:nucleus	EC:1.2.4.1
isotig00856	wd repeat-containing	826	10	3.21262e-105	85.8%	0	-
isotig00857	cbl-interacting serine threonine-protein	828	10	1.16492e-116	95.2%	8	P:hyperosmotic salinity response; F:calmodulin-dependent protein kinase activity; P:response to water deprivation; P:multicellular organismal development; P:protein phosphorylation; F:ATP binding; P:signal transduction; P:basipetal auxin transport	EC:2.7.11.17
isotig00858	dolichyl-diphosphooligosaccharide--protein glycosyltransferase subunit 1-like	832	10	1.20797e-107	88.6%	4	P:protein glycosylation; C:integral to membrane; F:dolichyl-diphosphooligosaccharide-protein glycotransferase activity; C:endoplasmic reticulum	EC:2.4.1.119
isotig00859	armadillo beta-catenin-like repeat-containing protein	837	10	1.27617e-95	86.9%	2	P:biological_process; C:cellular_component
isotig00860	cysteine proteinase	834	10	1.10556e-123	89.4%	7	P:defense response to bacterium; C:vacuole; P:response to desiccation; P:proteolysis; C:nucleus; P:response to salt stress; F:cysteine-type peptidase activity	-
isotig00861	chloroplast carbonic anhydrase	839	10	3.28067e-99	89.6%	14	C:cytosol; F:carbonate dehydratase activity; F:zinc ion binding; P:defense response to bacterium; P:response to cold; C:chloroplast envelope; P:regulation of stomatal movement; P:response to carbon dioxide; C:chloroplast thylakoid membrane; C:chloroplast stroma; P:defense response to fungus, incompatible interaction; P:carbon utilization; C:stromule; C:apoplast	EC:4.2.1.1
isotig00862	alkaline neutral invertase	831	10	1.27697e-86	83.6%	2	F:glycopeptide alpha-N-acetylgalactosaminidase activity; P:metabolic process	EC:3.2.1.97
isotig00863	magnesium-chelatase subunit chloroplastic-like	827	10	4.95376e-109	97.6%	8	C:cell wall; F:magnesium chelatase activity; P:chlorophyll biosynthetic process; P:ATP catabolic process; F:ATP binding; F:ATPase activity; C:chloroplast stroma; P:photosynthesis	EC:6.6.1.1; EC:3.6.1.3
isotig00864	alcohol dehydrogenase	830	10	3.40922e-113	88.3%	9	P:response to oxidative stress; P:response to cadmium ion; C:plasma membrane; F:2-alkenal reductase [NAD(P)] activity; C:nucleus; F:zinc ion binding; C:cytosol; F:nucleotide binding; P:oxidation-reduction process	EC:1.3.1.74
isotig00865	uncharacterized protein	836	10	1.65583e-18	50.5%	1	C:intracellular part	-
isotig00866	60s ribosomal protein l10-like	834	10	2.31595e-105	98.1%	9	P:translation; C:nucleolus; F:structural constituent of ribosome; C:chloroplast envelope; P:cellular response to UV-B; C:vacuolar membrane; P:developmental process; C:cytosolic large ribosomal subunit; C:plasma membrane	-
isotig00867	importin subunit alpha-1-like	823	10	6.38345e-124	94.1%	6	C:nucleolus; P:protein import into nucleus; C:cell wall; C:nuclear envelope; F:protein transporter activity; C:cytosol	-
isotig00868	vacuolar h+-atpase b subunit	831	10	6.70719e-121	95.0%	9	P:ATP metabolic process; F:proton-transporting ATP synthase activity, rotational mechanism; C:chloroplast envelope; F:ATP binding; F:proton-transporting ATPase activity, rotational mechanism; P:ATP hydrolysis coupled proton transport; C:vacuole; C:proton-transporting V-type ATPase, V1 domain; C:plasma membrane	-
isotig00869	cyclin-dependent kinase f-4-like	830	10	2.02613e-131	92.8%	6	P:protein phosphorylation; F:RNA polymerase II carboxy-terminal domain kinase activity; F:ATP binding; F:protein tyrosine kinase activity; P:positive regulation of translation; P:protein N-linked glycosylation	EC:2.7.11.23; EC:2.7.10.0
isotig00870	dna binding	819	10	1.76274e-73	80.9%	3	C:nucleus; F:DNA binding; P:transcription, DNA-dependent	-
isotig00871	auxin response factor 6-like	825	10	3.7409e-55	80.4%	6	P:regulation of transcription, DNA-dependent; P:flower development; F:DNA binding; F:protein dimerization activity; P:auxin mediated signaling pathway; C:nucleus	-
isotig00872	light-harvesting complex ii protein lhcb3	826	10	5.99985e-130	95.7%	3	P:photosynthesis, light harvesting; C:chloroplast thylakoid membrane; F:structural molecule activity	-
isotig00873	geranylgeranyl-diphosphate synthase	827	10	8.88333e-65	90.2%	14	P:diterpene phytoalexin metabolic process; F:metal ion binding; F:geranyltranstransferase activity; P:geranyl diphosphate biosynthetic process; C:etioplast; P:carotenoid biosynthetic process; F:farnesyltranstransferase activity; F:dimethylallyltranstransferase activity; P:geranylgeranyl diphosphate biosynthetic process; C:chloroplast; C:membrane; C:endoplasmic reticulum; C:mitochondrion; P:farnes…	EC:2.5.1.10; EC:2.5.1.29; EC:2.5.1.1
isotig00874	branched-chain amino acid	824	10	1.08896e-30	78.5%	8	F:L-leucine transaminase activity; P:glucosinolate biosynthetic process; F:methionine-oxo-acid transaminase activity; P:branched-chain amino acid metabolic process; F:L-valine transaminase activity; F:L-isoleucine transaminase activity; C:cytosol; C:mitochondrion	EC:2.6.1.42
isotig00875	quinone oxidoreductase-like protein chloroplastic-like	822	10	3.45659e-107	94.0%	11	F:NADPH:quinone reductase activity; P:pteridine-containing compound metabolic process; C:chloroplast envelope; P:response to cold; C:stromule; C:chloroplast stroma; C:thylakoid; F:zinc ion binding; C:apoplast; F:nucleotide binding; P:oxidation-reduction process	EC:1.6.5.5
isotig00876	tonoplast intrinsic	818	10	8.97316e-78	94.9%	13	C:chloroplast envelope; C:plant-type cell wall; P:water transport; C:plant-type vacuole membrane; C:central vacuole; P:urea transmembrane transport; C:plasma membrane; F:ammonia transmembrane transporter activity; F:methylammonium transmembrane transporter activity; P:methylammonium transmembrane transport; F:urea transmembrane transporter activity; C:integral to membrane; C:protein storage vacuo…	-
isotig00877	protein transport protein sec23	819	10	2.52774e-96	83.4%	6	C:COPII vesicle coat; P:intracellular protein transport; P:ER to Golgi vesicle-mediated transport; F:zinc ion binding; C:cytosol; F:transporter activity	-
isotig00058	nadh-plastoquinone oxidoreductase subunit 4	7925	10	0.0	88.3%	8	F:metal ion binding; F:NAD binding; F:quinone binding; F:NADH dehydrogenase (ubiquinone) activity; F:4 iron, 4 sulfur cluster binding; C:integral to membrane; P:ATP synthesis coupled electron transport; C:chloroplast thylakoid membrane	EC:1.6.5.3
isotig00059	nadh-plastoquinone oxidoreductase subunit 4	7898	10	0.0	88.3%	8	F:metal ion binding; F:NAD binding; F:quinone binding; F:NADH dehydrogenase (ubiquinone) activity; F:4 iron, 4 sulfur cluster binding; C:integral to membrane; P:ATP synthesis coupled electron transport; C:chloroplast thylakoid membrane	EC:1.6.5.3
isotig00060	nadh-plastoquinone oxidoreductase subunit 4	6832	10	0.0	88.1%	8	F:metal ion binding; F:NAD binding; F:quinone binding; F:NADH dehydrogenase (ubiquinone) activity; F:4 iron, 4 sulfur cluster binding; C:integral to membrane; P:ATP synthesis coupled electron transport; C:chloroplast thylakoid membrane	EC:1.6.5.3
isotig00061	nadh-plastoquinone oxidoreductase subunit 4	6805	10	0.0	88.1%	8	F:metal ion binding; F:NAD binding; F:quinone binding; F:NADH dehydrogenase (ubiquinone) activity; F:4 iron, 4 sulfur cluster binding; C:integral to membrane; P:ATP synthesis coupled electron transport; C:chloroplast thylakoid membrane	EC:1.6.5.3
isotig00062	oxygen evolving enhancer protein 1	1165	10	6.27644e-149	93.7%	14	C:extrinsic to membrane; F:poly(U) RNA binding; F:oxygen evolving activity; F:calcium ion binding; P:defense response to bacterium; C:chloroplast thylakoid membrane; P:photoinhibition; C:plastoglobule; P:photosystem II assembly; P:regulation of protein dephosphorylation; P:photosystem II stabilization; C:oxygen evolving complex; C:chloroplast thylakoid lumen; C:apoplast	-
isotig00063	oxygen evolving enhancer protein 1	1164	10	1.82338e-155	94.3%	5	C:extrinsic to membrane; F:calcium ion binding; P:photosystem II stabilization; C:chloroplast thylakoid membrane; C:oxygen evolving complex	-
isotig00064	oxygen evolving enhancer protein 1 precursor	902	10	5.03076e-93	95.1%	14	C:extrinsic to membrane; F:poly(U) RNA binding; F:oxygen evolving activity; F:calcium ion binding; P:defense response to bacterium; C:chloroplast thylakoid membrane; P:photoinhibition; C:plastoglobule; P:photosystem II assembly; P:regulation of protein dephosphorylation; P:photosystem II stabilization; C:oxygen evolving complex; C:chloroplast thylakoid lumen; C:apoplast	-
isotig00065	uncharacterized protein	1089	10	1.33553e-119	82.6%	4	P:response to karrikin; C:plasmodesma; C:plant-type cell wall; P:root morphogenesis	-
isotig00066	uncharacterized protein loc100252479	1076	10	2.04626e-120	82.6%	2	C:plant-type cell wall; P:response to karrikin	-
isotig00067	photosystem ii 47 kda protein	5518	10	0.0	99.0%	6	C:photosystem II; P:photosynthetic electron transport chain; P:protein-chromophore linkage; F:chlorophyll binding; C:integral to membrane; C:chloroplast thylakoid membrane	-
isotig00878	probable glutathione s-transferase parc-like isoform 1	816	10	4.74696e-87	87.5%	3	P:response to karrikin; P:glutathione metabolic process; F:transferase activity	-
isotig00879	e3 ubiquitin-protein ligase upl1-like	803	10	9.00116e-67	81.7%	3	C:intracellular; P:cellular protein modification process; F:acid-amino acid ligase activity	EC:6.3.2.0
isotig00880	mip pip subfamily	818	10	9.30732e-67	87.7%	3	P:transport; C:integral to membrane; F:transporter activity	-
isotig00881	cytochrome p450	816	10	1.58081e-58	70.4%	2	F:metal ion binding; F:oxidoreductase activity	-
isotig00882	glucomannan 4-beta-mannosyltransferase 2-like	810	10	1.07524e-75	73.2%	1	F:transferase activity, transferring hexosyl groups	EC:2.4.1.0
isotig00883	cohesin loading factor subunit scc2	796	10	7.31394e-45	64.0%	8	P:meiotic sister chromatid cohesion; P:cellular macromolecule metabolic process; F:metal ion binding; P:nucleic acid metabolic process; P:centromere complex assembly; P:meiosis I; P:regulation of cellular process; P:embryo development ending in seed dormancy	-
isotig00884	60s ribosomal protein l6	809	10	5.22976e-73	92.6%	7	C:nucleolus; F:structural constituent of ribosome; C:plasma membrane; C:cytosolic large ribosomal subunit; C:chloroplast; P:translation; C:endoplasmic reticulum	-
isotig00885	inositol or phosphatidylinositol	794	10	3.86038e-38	63.3%	1	F:protein histidine kinase binding	-
isotig00886	chaperone binding	802	10	8.12235e-76	89.4%	0	-
isotig00887	clip-associating protein	813	10	4.66282e-103	86.1%	15	P:multidimensional cell growth; C:cytosol; P:root hair elongation; P:cellulose metabolic process; P:polysaccharide biosynthetic process; P:cell tip growth; P:cell wall organization; C:spindle microtubule; C:plasmodesma; P:protein stabilization; P:anthocyanin accumulation in tissues in response to UV light; P:regulation of hormone levels; P:mitosis; P:plant-type cell wall biogenesis; C:plasma memb…	-
isotig00888	abscisic acid 8 -hydroxylase	812	10	1.35982e-94	93.8%	12	P:electron transport chain; F:(+)-abscisic acid 8'-hydroxylase activity; P:response to water deprivation; P:abscisic acid catabolic process; P:secretion by cell; F:electron carrier activity; P:response to deep water; P:response to abscisic acid stimulus; F:heme binding; P:release of seed from dormancy; P:defense response to fungus; P:response to red or far red light	EC:1.14.13.93
isotig00889	nucleobase-ascorbate transporter 6	812	10	1.82511e-115	94.5%	6	C:membrane; C:plasmodesma; C:vacuole; C:cell wall; P:transmembrane transport; F:transmembrane transporter activity	-
isotig00890	galactinol--sucrose galactosyltransferase 6	777	10	7.65611e-103	90.6%	10	F:raffinose alpha-galactosidase activity; P:response to sucrose stimulus; P:response to oxidative stress; P:response to cold; C:plasmodesma; F:galactinol-raffinose galactosyltransferase activity; P:response to fructose stimulus; P:metabolic process; C:chloroplast; P:response to karrikin	EC:3.2.1.22; EC:2.4.1.67
isotig00891	atp-dependent clp protease proteolytic	808	10	1.58105e-92	95.1%	10	P:response to reactive oxygen species; P:regulation of gene expression; P:regulation of protein localization; P:isopentenyl diphosphate biosynthetic process, methylerythritol 4-phosphate pathway; C:chloroplast envelope; P:systemic acquired resistance; P:proteolysis; C:chloroplast stroma; P:regulation of defense response; F:serine-type endopeptidase activity	EC:3.4.21.0
isotig00892	ras-related protein rab7-like	806	10	5.62391e-101	99.1%	9	P:response to oxidative stress; F:GTP binding; C:plasma membrane; C:vacuolar membrane; F:hydrolase activity; C:nucleus; P:small GTPase mediated signal transduction; P:response to salt stress; P:protein transport	-
isotig00893	ref srpp-like protein at1g67360-like	808	10	6.52474e-50	78.8%	1	C:vacuole
isotig00894	vacuolar atp synthase subunit	803	10	1.2502e-84	89.7%	11	P:response to salt stress; P:defense response to bacterium; P:response to cold; C:plant-type vacuole membrane; F:proton-transporting ATPase activity, rotational mechanism; P:Golgi organization; P:ATP hydrolysis coupled proton transport; P:plant-type cell wall biogenesis; C:cytosolic ribosome; C:proton-transporting two-sector ATPase complex, catalytic domain; C:plasma membrane	-
isotig00895	callose synthase	801	10	1.49273e-127	97.9%	15	P:microtubule cytoskeleton organization; P:methylation-dependent chromatin silencing; P:chromatin silencing by small RNA; P:cell-cell signaling; P:cytokinesis by cell plate formation; P:histone H3-K9 methylation; P:membrane fusion; P:microsporogenesis; P:(1->3)-beta-D-glucan biosynthetic process; P:production of miRNAs involved in gene silencing by miRNA; P:production of ta-siRNAs involved in RNA…	EC:2.4.1.34
isotig00896	u-box domain-containing protein 26	805	10	1.03207e-79	84.1%	4	P:response to chitin; P:protein ubiquitination; F:ubiquitin-protein ligase activity; C:ubiquitin ligase complex	EC:6.3.2.19
isotig00897	probable nitrite transporter at1g68570-like	803	10	4.13299e-104	89.5%	3	C:integral to membrane; P:oligopeptide transport; F:transporter activity	-
isotig00898	heat shock protein 70 -interacting	801	10	1.1309e-61	74.1%	7	P:response to high light intensity; P:nucleotide biosynthetic process; P:response to cadmium ion; C:plasma membrane; P:response to hydrogen peroxide; C:nucleus; C:cytosol	-
isotig00899	ycf1_lobma ame: full= membrane protein ycf1	802	10	2.74066e-116	95.0%	2	C:chloroplast membrane; C:integral to membrane	-
isotig00900	tetratricopeptide repeat-containing protein	799	10	4.26763e-85	80.3%	3	P:mRNA modification; P:translational initiation; F:translation initiation factor activity	-
isotig00901	xyloglucan endotransglucosylase hydrolase protein 2	788	10	6.35471e-114	90.6%	8	F:xyloglucan:xyloglucosyl transferase activity; F:hydrolase activity, hydrolyzing O-glycosyl compounds; P:fruit development; P:stamen filament development; C:cell wall; P:phloem or xylem histogenesis; P:cellular glucan metabolic process; C:apoplast	EC:2.4.1.207; EC:3.2.1.0
isotig00902	succinate dehydrogenase	795	10	1.74805e-123	96.3%	9	C:cell wall; C:mitochondrial respiratory chain complex II; F:cobalt ion binding; P:tricarboxylic acid cycle; F:ATP binding; P:mitochondrial electron transport, succinate to ubiquinone; F:flavin adenine dinucleotide binding; F:succinate dehydrogenase (ubiquinone) activity; F:disulfide oxidoreductase activity	EC:1.3.5.1
isotig00903	uncharacterized protein loc100243774	793	10	2.44658e-78	82.6%	0	-
isotig00904	uncharacterized membrane	797	10	2.11328e-68	84.9%	3	C:vacuole; C:chloroplast envelope; C:plasma membrane	-
isotig00905	major facilitator protein	783	10	2.22476e-115	98.9%	2	C:plasma membrane; C:Golgi apparatus	-
isotig00906	cc-nbs-lrr resistance protein	783	10	9.77777e-15	59.4%	4	P:defense response; F:ADP binding; F:hydrolase activity; F:phosphoprotein phosphatase activity
isotig00907	at3g23920-like partial	791	10	8.23014e-92	92.6%	25	F:beta-amylase activity; P:regulation of meristem structural organization; P:response to water deprivation; P:microsporocyte differentiation; P:multidimensional cell growth; P:starch catabolic process; F:protein self-association; P:regulation of meristem growth; P:anthocyanin accumulation in tissues in response to UV light; P:root hair elongation; C:cytosol; P:transmembrane receptor protein tyros…	EC:3.2.1.2; EC:2.7.11.0
isotig00908	ring finger	788	10	5.48423e-45	62.8%	1	F:metal ion binding	-
isotig00909	cytochrome p450 71d11-like	793	10	1.23038e-68	74.9%	2	F:oxidoreductase activity, acting on paired donors, with incorporation or reduction of molecular oxygen, NAD(P)H as one donor, and incorporation of one atom of oxygen; F:iron ion binding	EC:1.14.13.0
isotig00910	glyceraldehyde-3-phosphate dehydrogenase c subunit	785	10	2.5413e-103	97.0%	36	C:vacuolar membrane; P:cytoskeleton organization; P:pentose-phosphate shunt; P:gluconeogenesis; C:apoplast; P:response to sucrose stimulus; F:zinc ion binding; F:NAD binding; P:response to hydrogen peroxide; P:water transport; P:regulation of transport; P:isopentenyl diphosphate biosynthetic process, methylerythritol 4-phosphate pathway; F:NADP binding; P:response to salt stress; P:proteasomal pr…	EC:1.2.1.12; EC:1.2.1.9
isotig00911	dna binding	782	10	1.43537e-130	97.3%	10	P:regulation of meristem growth; P:regulation of transcription, DNA-dependent; P:meristem initiation; P:phloem or xylem histogenesis; P:leaf morphogenesis; F:sequence-specific DNA binding; F:sequence-specific DNA binding transcription factor activity; P:integument development; P:determination of dorsal identity; C:nucleus	-
isotig00912	protein tify 3b	791	10	5.74182e-27	64.9%	7	P:regulation of plant-type hypersensitive response; P:jasmonic acid mediated signaling pathway; C:intracellular; P:response to wounding; P:positive regulation of flavonoid biosynthetic process; P:protein targeting to membrane; F:protein binding	-
isotig00913	e3 ubiquitin-protein ligase ubr4	788	10	1.25556e-65	67.6%	11	C:cytosol; P:response to fungus; C:plasmodesma; P:auxin polar transport; P:photomorphogenesis; P:lateral root formation; P:response to auxin stimulus; P:indeterminate inflorescence morphogenesis; P:unidimensional cell growth; F:catalytic activity; C:membrane	-
isotig00914	f-box family protein	767	10	3.91433e-81	85.6%	0	-
isotig00915	ribosomal protein s1	784	10	3.61059e-81	96.6%	14	P:pentose-phosphate shunt; C:membrane; C:ribosome; P:translation; P:isopentenyl diphosphate biosynthetic process, methylerythritol 4-phosphate pathway; P:chloroplast relocation; P:chlorophyll biosynthetic process; P:photosynthetic electron transport in photosystem I; C:chloroplast stroma; C:thylakoid; F:structural constituent of ribosome; F:RNA binding; P:rRNA processing; P:thylakoid membrane org…	-
isotig00916	vascular protein	784	10	2.85799e-55	69.5%	3	C:cytosol; C:plasma membrane; F:nucleotide binding	-
isotig00917	global transcription factor group	771	10	6.86245e-101	93.6%	4	P:translation; C:ribosome; F:structural constituent of ribosome; P:positive regulation of transcription elongation from RNA polymerase II promoter	-
isotig00918	chromodomain helicase dna binding protein	770	10	4.58012e-57	71.1%	15	P:cell adhesion; P:actin nucleation; P:cell wall biogenesis; P:regulation of transcription, DNA-dependent; P:protein desumoylation; P:nuclear-transcribed mRNA catabolic process; F:metal ion binding; P:trichome morphogenesis; P:hydrogen peroxide biosynthetic process; F:DNA binding; P:root hair cell differentiation; P:vegetative to reproductive phase transition of meristem; P:cell wall macromolecul…	-
isotig00919	e3 ubiquitin-protein ligase upl1-like	787	10	6.94159e-71	90.4%	7	P:protein ubiquitination involved in ubiquitin-dependent protein catabolic process; C:plasmodesma; F:ubiquitin-protein ligase activity; C:membrane; C:cytosol; C:mitochondrion; C:ubiquitin ligase complex	EC:6.3.2.19
isotig00920	eukaryotic translation initiation factor 4 gamma	765	10	1.07162e-66	91.3%	2	P:translational initiation; F:translation initiation factor activity	-
isotig00921	nucleoprotein tpr	769	10	2.64076e-89	83.2%	14	P:microtubule cytoskeleton organization; P:poly(A)+ mRNA export from nucleus; F:protein binding; P:negative regulation of flower development; C:chloroplast; P:negative regulation of protein sumoylation; C:nucleolus; C:cytosol; F:nucleic acid binding; C:nuclear pore; P:anaphase; C:plasmodesma; P:protein import into nucleus; P:stamen development	-
isotig00922	peptide transporter protein	774	10	1.9495e-50	62.1%	3	P:chloroplast relocation; P:actin filament bundle assembly; C:actin filament	-
isotig00923	chlorophyllide a chloroplastic-like	782	10	6.05859e-113	89.8%	8	P:oxidation-reduction process; F:2 iron, 2 sulfur cluster binding; F:chlorophyllide a oxygenase [overall] activity; P:chlorophyll biosynthetic process; C:thylakoid membrane; F:oxidoreductase activity, acting on paired donors, with incorporation or reduction of molecular oxygen; C:chloroplast inner membrane; F:iron ion binding	EC:1.13.12.14
isotig00924	---NA---	781	0			0	-
isotig00925	hyoscyamine 6-	783	10	1.28397e-54	67.2%	1	F:dioxygenase activity	-
isotig00926	probable methionyl-trna synthetase	783	10	1.96746e-103	82.8%	8	C:cytoplasm; P:response to cadmium ion; F:electron carrier activity; P:methionyl-tRNA aminoacylation; F:ATP binding; F:methionine-tRNA ligase activity; F:tRNA binding; P:electron transport chain	EC:6.1.1.10
isotig00927	fasciclin-like arabinogalactan protein 17	775	10	8.06891e-87	88.9%	1	C:vacuole	-
isotig00928	hydroxycinnamoyl shikimate quinate hydroxycinnamoyltransferase-like protein	779	10	1.43507e-106	87.2%	5	F:tyramine N-feruloyltransferase activity; P:suberin biosynthetic process; F:hydroxycinnamoyltransferase activity; P:cell wall pectin biosynthetic process; F:anthranilate N-benzoyltransferase activity	EC:2.3.1.110; EC:2.3.1.144
isotig00929	salicylate o-methyltransferase	773	10	1.41771e-98	86.3%	2	P:methylation; F:jasmonate O-methyltransferase activity	EC:2.1.1.141
isotig00930	ring finger protein	751	10	2.55235e-31	58.3%	1	F:metal ion binding	-
isotig00931	signal recognition particle 54 kda chloroplastic-like	777	10	3.79406e-92	94.3%	15	F:protein binding; F:nucleoside-triphosphatase activity; C:signal recognition particle, endoplasmic reticulum targeting; P:isopentenyl diphosphate biosynthetic process, methylerythritol 4-phosphate pathway; F:7S RNA binding; P:defense response to virus; F:GTP binding; C:chloroplast stroma; C:signal recognition particle, chloroplast targeting; P:production of miRNAs involved in gene silencing by m…	EC:3.6.1.15
isotig00932	uncharacterized protein loc100252590	776	4	44.211	67.75%	0	-
isotig00933	early light-inducible protein	776	10	3.33834e-47	75.7%	1	P:response to red or far red light	-
isotig00934	carotenoid cleavage dioxygenase 1	772	10	2.28727e-116	96.3%	1	F:oxidoreductase activity, acting on single donors with incorporation of molecular oxygen, incorporation of two atoms of oxygen	EC:1.13.11.0
isotig00935	glyoxalase i	772	10	1.3663e-85	92.9%	4	P:response to cadmium ion; F:metal ion binding; F:lactoylglutathione lyase activity; C:chloroplast	EC:4.4.1.5
isotig00936	o-acetyltransferase family protein	774	10	1.46031e-111	92.0%	6	C:Golgi apparatus; P:secondary cell wall biogenesis; P:defense response to fungus; P:response to abscisic acid stimulus; C:membrane; C:endoplasmic reticulum	-
isotig00937	2-oxoglutarate-dependent dioxygenase	765	10	1.53313e-98	81.9%	5	F:flavonol synthase activity; F:iron ion binding; F:oxidoreductase activity, acting on single donors with incorporation of molecular oxygen, incorporation of two atoms of oxygen; P:flavonol biosynthetic process; P:oxidation-reduction process	EC:1.14.11.23; EC:1.13.11.0
isotig00938	mitochondrial dicarboxylate carrier	772	10	1.90652e-87	92.7%	6	F:dicarboxylic acid transmembrane transporter activity; P:dicarboxylic acid transport; P:transmembrane transport; P:mitochondrial transport; C:integral to membrane; C:mitochondrial membrane	-
isotig00939	hydroxymethylglutaryl- synthase	771	10	6.81492e-93	90.7%	2	P:isoprenoid biosynthetic process; F:hydroxymethylglutaryl-CoA synthase activity	EC:2.3.3.10
isotig00940	pyridoxal phosphate-dependent ybl036c type	764	10	2.53296e-92	89.6%	2	F:pyridoxal phosphate binding; P:hydrogen peroxide catabolic process	-
isotig00941	nascent polypeptide-associated complex subunit alpha-like	746	10	2.84747e-32	88.0%	3	C:cytosolic ribosome; F:calcium-transporting ATPase activity; P:response to salt stress	EC:3.6.3.8
isotig00942	histone h3	770	10	1.33261e-56	99.9%	6	P:glucose catabolic process; C:nucleosome; F:DNA binding; P:protein targeting; P:nucleosome assembly; C:nucleus	-
isotig00943	heat shock	767	10	9.39237e-87	94.6%	15	P:oxidation-reduction process; C:mitochondrion; P:protein folding; P:response to cold; C:chloroplast envelope; P:response to heat; C:thylakoid; F:ATP binding; C:chloroplast stroma; F:2-alkenal reductase [NAD(P)] activity; F:unfolded protein binding; P:protein targeting to chloroplast; P:response to cadmium ion; C:nucleus; C:apoplast	EC:1.3.1.74
isotig00944	nucleotide-sugar transporter family protein	767	10	4.33797e-68	94.5%	5	C:Golgi apparatus; P:pollen exine formation; P:purine nucleobase transport; F:organic anion transmembrane transporter activity; C:integral to membrane	-
isotig00945	dicarboxylate tricarboxylate carrier	771	10	1.56383e-105	95.1%	7	F:dicarboxylic acid transmembrane transporter activity; P:dicarboxylic acid transport; C:vacuolar membrane; C:integral to membrane; P:tricarboxylic acid transmembrane transport; C:mitochondrion; F:tricarboxylic acid transmembrane transporter activity	-
isotig00946	nadp-dependent malic enzyme-like	769	10	7.44516e-108	95.9%	10	F:cobalt ion binding; F:NAD binding; F:malate dehydrogenase (oxaloacetate-decarboxylating) activity; P:malate metabolic process; C:chloroplast; F:zinc ion binding; F:malate dehydrogenase (oxaloacetate-decarboxylating) (NADP+) activity; F:protein homodimerization activity; P:oxidation-reduction process; P:protein homotetramerization	EC:1.1.1.38; EC:1.1.1.40
isotig00947	hyoscyamine 6-	767	10	2.73248e-49	69.2%	1	F:dioxygenase activity	-
isotig00948	bifunctional polymyxin resistance protein	762	10	5.13699e-85	96.3%	4	P:cellular metabolic process; F:UDP-glucuronate decarboxylase activity; F:nucleotide binding; F:coenzyme binding	EC:4.1.1.35
isotig00949	fructose-bisphosphate aldolase	766	10	1.44568e-95	93.1%	4	P:glycolysis; P:response to hypoxia; F:fructose-bisphosphate aldolase activity; C:chloroplast	EC:4.1.2.13
isotig00950	uncharacterized protein	764	10	1.36157e-32	60.6%	2	P:biological_process; C:anchored to membrane
isotig00951	fructokinase-like protein	768	10	1.10738e-119	95.1%	5	F:fructokinase activity; P:phosphorylation; P:D-ribose metabolic process; C:plasma membrane; F:ribokinase activity	EC:2.7.1.4; EC:2.7.1.15
isotig00952	photosystem ii stability assembly factor chloroplastic-like	766	10	3.66783e-107	97.4%	6	C:chloroplast stromal thylakoid; P:protein complex assembly; C:chloroplast thylakoid lumen; P:response to cadmium ion; P:plastid organization; C:chloroplast thylakoid membrane	-
isotig00953	protein	765	10	6.4621e-16	80.7%	9	F:non-membrane spanning protein tyrosine kinase activity; P:pollen tube reception; C:plasma membrane; P:protein autophosphorylation; C:filiform apparatus; P:defense response to fungus; P:post-embryonic development; F:ATP binding; F:protein serine/threonine kinase activity	EC:2.7.10.2; EC:2.7.11.0
isotig00954	hyoscyamine 6-	766	10	3.60236e-54	71.2%	2	F:oxidoreductase activity, acting on paired donors, with incorporation or reduction of molecular oxygen, 2-oxoglutarate as one donor, and incorporation of one atom each of oxygen into both donors; P:metabolic process	EC:1.14.11.0
isotig00955	nuclear-pore anchor-like	766	6	1.63969e-06	561666666666666	1	C:intracellular membrane-bounded organelle	-
isotig00956	adp-ribosylation factor 2-like	762	10	2.0769e-86	99.9%	5	C:vacuole; F:GTP binding; C:Golgi-associated vesicle; C:plastid; P:small GTPase mediated signal transduction	-
isotig00957	pyrroline-5-carboxylate synthetase	762	10	2.16828e-67	90.1%	5	C:cytoplasm; P:proline biosynthetic process; F:glutamate 5-kinase activity; F:glutamate-5-semialdehyde dehydrogenase activity; P:oxidation-reduction process	EC:2.7.2.11; EC:1.2.1.41
isotig00958	2-oxoglutarate malate translocator	761	10	1.69823e-104	94.3%	8	F:oxoglutarate:malate antiporter activity; P:response to nematode; C:chloroplast envelope; P:transmembrane transport; P:malate transport; C:chloroplast thylakoid; C:membrane; P:sodium ion transport	-
isotig00959	mitogen-activated protein kinase kinase	758	10	5.43482e-95	87.7%	14	P:response to wounding; P:systemic acquired resistance, salicylic acid mediated signaling pathway; F:protein kinase activator activity; P:ethylene biosynthetic process; P:ethylene mediated signaling pathway; P:defense response to oomycetes; P:camalexin biosynthetic process; P:response to salt stress; P:defense response to bacterium; P:protein autophosphorylation; F:protein serine/threonine kinase…	EC:2.7.11.0
isotig00960	protein	760	10	2.74235e-80	81.9%	3	F:anthocyanidin 3-O-glucosyltransferase activity; F:flavonol 3-O-glucosyltransferase activity; P:metabolic process	EC:2.4.1.115; EC:2.4.1.91
isotig00961	mitogen-activated protein kinase	728	10	1.25143e-66	87.5%	6	C:cytoplasm; P:cortical microtubule organization; F:MAP kinase activity; P:MAPK cascade; P:protein phosphorylation; F:ATP binding	EC:2.7.11.24
isotig00962	neutral invertase	753	10	1.18703e-110	93.9%	3	F:glycopeptide alpha-N-acetylgalactosaminidase activity; F:sucrose alpha-glucosidase activity; P:metabolic process	EC:3.2.1.97; EC:3.2.1.26; EC:3.2.1.48
isotig00963	guanine nucleotide-exchange factor	736	10	1.7861e-63	66.4%	9	P:vesicle-mediated transport; C:cytosol; P:anatomical structure development; P:defense response to bacterium; P:growth; P:regulation of organelle organization; C:early endosome; F:protein binding; C:trans-Golgi network	-
isotig00964	---NA---	755	0			0	-
isotig00965	ankyrin repeat domain	750	10	4.03744e-92	85.3%	24	P:regulation of proton transport; P:response to far red light; P:response to sucrose stimulus; F:chlorophyllide a oxygenase [overall] activity; P:response to red light; C:chloroplast inner membrane; P:chlorophyll biosynthetic process; P:protein autophosphorylation; F:oxidoreductase activity, acting on paired donors, with incorporation or reduction of molecular oxygen; F:2 iron, 2 sulfur cluster b…	EC:1.13.12.14
isotig00966	methylenetetrahydrofolate reductase	754	10	4.59814e-70	92.6%	4	C:cytosol; P:methionine metabolic process; F:methylenetetrahydrofolate reductase (NADPH) activity; P:oxidation-reduction process	EC:1.5.1.20
isotig00967	e3 ubiquitin-protein ligase upl3	746	10	4.94531e-85	79.9%	9	P:protein desumoylation; C:intracellular; P:vegetative to reproductive phase transition of meristem; F:ubiquitin-protein ligase activity; P:protein ubiquitination involved in ubiquitin-dependent protein catabolic process; P:trichome branching; P:DNA endoreduplication; P:hydrogen peroxide biosynthetic process; C:plasma membrane	EC:6.3.2.19
isotig00968	protein chup1	756	10	1.37168e-98	88.6%	8	P:chloroplast relocation; P:rRNA processing; P:thylakoid membrane organization; P:transcription from plastid promoter; P:photosystem II assembly; P:positive regulation of transcription, DNA-dependent; C:chloroplast outer membrane; P:regulation of protein dephosphorylation	-
isotig00969	glutelin type-a	754	10	8.28318e-112	91.5%	3	F:zinc ion binding; F:copper ion binding; F:nutrient reservoir activity	-
isotig00970	translation elongation factor ef-g	756	10	6.17512e-115	97.4%	27	P:pentose-phosphate shunt; C:chloroplast envelope; C:apoplast; P:regulation of protein dephosphorylation; P:positive regulation of catalytic activity; P:embryo development ending in seed dormancy; P:starch biosynthetic process; P:photosystem II assembly; F:translation elongation factor activity; P:chloroplast relocation; P:maltose metabolic process; P:translational elongation; F:GTP binding; P:GT…	-
isotig00971	fasciclin-like arabinogalactan protein 17	753	10	3.53033e-61	86.7%	1	C:vacuole	-
isotig00972	poly polymerase-like	727	10	9.84316e-102	93.2%	5	P:RNA polyadenylation; P:transcription, DNA-dependent; F:RNA binding; F:polynucleotide adenylyltransferase activity; C:nucleus	EC:2.7.7.19
isotig00973	tetratricopeptide repeat-containing protein	746	10	5.84172e-86	79.0%	3	P:mRNA modification; P:translational initiation; F:translation initiation factor activity	-
isotig00974	betaine-aldehyde dehydrogenase	747	10	2.22155e-110	94.6%	10	P:glycine betaine biosynthetic process; P:response to water deprivation; P:phenylpropanoid metabolic process; C:peroxisome; C:cell wall; P:response to abscisic acid stimulus; C:leucoplast; F:betaine-aldehyde dehydrogenase activity; P:response to salt stress; P:oxidation-reduction process	EC:1.2.1.8
isotig00975	protein transport protein sec31-like isoform 2	752	10	1.28005e-80	79.0%	0	-
isotig00976	dead-box atp-dependent rna helicase 3	752	10	4.02557e-42	74.4%	9	C:chloroplast envelope; F:ATP-dependent helicase activity; P:embryo development ending in seed dormancy; F:RNA binding; F:ATP binding; C:chloroplast stroma; C:membrane; C:nucleus; F:zinc ion binding	-
isotig00977	probable photosystem i chain xi precursor	740	10	1.42203e-62	95.9%	9	C:photosystem I reaction center; P:rRNA processing; C:chloroplast envelope; P:plastid organization; C:chloroplast thylakoid membrane; P:cellular cation homeostasis; C:plastoglobule; P:photosystem II assembly; P:divalent metal ion transport	-
isotig00068	photosystem ii 47 kda protein	4791	10	0.0	99.0%	6	C:photosystem II; P:photosynthetic electron transport chain; P:protein-chromophore linkage; F:chlorophyll binding; C:integral to membrane; C:chloroplast thylakoid membrane	-
isotig00069	photosystem ii 47 kda protein	4707	10	0.0	99.0%	6	C:photosystem II; P:photosynthetic electron transport chain; P:protein-chromophore linkage; F:chlorophyll binding; C:integral to membrane; C:chloroplast thylakoid membrane	-
isotig00070	photosystem ii 47 kda protein	3980	10	0.0	99.0%	6	C:photosystem II; P:photosynthetic electron transport chain; P:protein-chromophore linkage; F:chlorophyll binding; C:integral to membrane; C:chloroplast thylakoid membrane	-
isotig00071	nadh-plastoquinone oxidoreductase subunit 2	4878	10	2.68196e-136	97.5%	12	F:quinone binding; P:translation; P:transport; P:photosynthesis, light reaction; F:NADH dehydrogenase (ubiquinone) activity; C:small ribosomal subunit; C:integral to membrane; F:rRNA binding; F:structural constituent of ribosome; P:ATP synthesis coupled electron transport; C:chloroplast thylakoid membrane; C:plasma membrane	EC:1.6.5.3
isotig00072	nadh-plastoquinone oxidoreductase subunit 2	4344	10	2.37396e-136	97.5%	12	F:quinone binding; P:translation; P:transport; P:photosynthesis, light reaction; F:NADH dehydrogenase (ubiquinone) activity; C:small ribosomal subunit; C:integral to membrane; F:rRNA binding; F:structural constituent of ribosome; P:ATP synthesis coupled electron transport; C:chloroplast thylakoid membrane; C:plasma membrane	EC:1.6.5.3
isotig00073	nadh-plastoquinone oxidoreductase subunit 2	4198	10	0.0	97.6%	8	C:plasma membrane; F:quinone binding; F:NADH dehydrogenase (ubiquinone) activity; P:transport; C:integral to membrane; P:ATP synthesis coupled electron transport; P:photosynthesis, light reaction; C:chloroplast thylakoid membrane	EC:1.6.5.3
isotig00074	nadh-plastoquinone oxidoreductase subunit 2	3664	10	0.0	97.6%	8	C:plasma membrane; F:quinone binding; F:NADH dehydrogenase (ubiquinone) activity; P:transport; C:integral to membrane; P:ATP synthesis coupled electron transport; P:photosynthesis, light reaction; C:chloroplast thylakoid membrane	EC:1.6.5.3
isotig00075	ribosomal protein l2	4981	10	1.00265e-154	88.7%	7	F:structural constituent of ribosome; F:RNA binding; C:large ribosomal subunit; F:transferase activity; C:chloroplast; P:translation; C:mitochondrion	-
isotig00076	nadh dehydrogenase subunit 7	4646	10	0.0	99.2%	6	P:cellular respiration; F:NAD binding; P:response to cadmium ion; F:quinone binding; C:mitochondrial respiratory chain complex I; F:NADH dehydrogenase activity	EC:1.6.99.3
isotig00077	ribosomal protein l2	3433	10	6.74087e-155	88.7%	7	F:structural constituent of ribosome; F:RNA binding; C:large ribosomal subunit; F:transferase activity; C:chloroplast; P:translation; C:mitochondrion	-
GR7D2IN01EER20	uncharacterized protein	491	10	1.05392e-46	93.4%	3	F:molecular_function; P:biological_process; C:cellular_component
GR7D2IN01AFSBT	protein phosphatase 2c 32-like	472	10	2.52422e-60	89.8%	6	P:regulation of meristem structural organization; F:phosphoprotein phosphatase activity; F:phospholipid binding; C:plasma membrane; P:maintenance of meristem identity; P:metabolic process	EC:3.1.3.16
GR7D2IN01BW3MO	protein binding	361	10	2.91814e-23	88.9%	2	P:RNA splicing; F:RNA polymerase binding	-
GR7D2IN01ELL7P	---NA---	387	0			0	-
GR7D2IN01D0JD3	aberrant root formation protein 4-like	443	7	3.58484e-08	66.0%	2	C:cytoplasm; C:nucleus
GR7D2IN01AM2UN	la rna-binding protein	465	10	9.81374e-17	70.1%	2	C:cytosol; C:nucleus	-
GR7D2IN01CYT5A	aspartyl protease family protein	452	10	1.36603e-49	90.4%	3	C:anchored to membrane; P:proteolysis; F:aspartic-type endopeptidase activity	EC:3.4.23.0
GR7D2IN01AOL65	uncharacterized protein loc100807902	326	9	9.59582e-05	7.02222e+13	0	-
GR7D2IN01B61IP	---NA---	413	0			0	-
GR7D2IN01B5FM7	---NA---	395	0			0	-
GR7D2IN01BMNF5	wrky transcription factor	364	10	1.02058e-23	94.0%	3	F:sequence-specific DNA binding transcription factor activity; F:sequence-specific DNA binding; P:regulation of transcription, DNA-dependent	-
GR7D2IN01EKH54	eukaryotic translation initiation factor 5b	295	10	5.76185e-14	91.7%	7	F:translation initiation factor activity; P:translational initiation; C:cytosol; P:GTP catabolic process; F:GTPase activity; F:GTP binding; C:plasma membrane	-
GR7D2IN01C36JA	unknown [Populus trichocarpa]	365	1	0.0199878	61.0%	2	F:polysaccharide binding; C:chloroplast
GR7D2IN01B3CYM	non-specific lipid-transfer protein	463	10	2.21877e-13	69.0%	1	P:transport	-
GR7D2IN01EG2HH	---NA---	407	0			0	-
GR7D2IN01CN9EP	atp binding	460	1	2.47352	81.0%	4	P:response to stress; P:protein phosphorylation; F:ATP binding; F:phosphorylase kinase activity	EC:2.7.11.19
GR7D2IN01ESERJ	aspartyl protease family protein	235	10	2.34083e-11	80.0%	3	C:plant-type cell wall; P:proteolysis; F:aspartic-type endopeptidase activity	EC:3.4.23.0
GR7D2IN01C2SLR	atp binding	370	10	1.28012e-30	87.4%	2	F:microtubule-severing ATPase activity; F:ATP binding	EC:3.6.4.3
GR7D2IN01AXO7U	protease 2-like	388	10	2.33726e-11	86.8%	5	F:serine-type exopeptidase activity; C:mitochondrion; P:proteolysis; F:serine-type endopeptidase activity; C:chloroplast	EC:3.4.21.0; EC:3.4.21.0
GR7D2IN01ASJAH	apyrase partial	340	10	7.45162e-12	71.0%	4	F:nucleoside-diphosphatase activity; F:ATPase activity; P:pollen germination; C:Golgi apparatus	EC:3.6.1.6; EC:3.6.1.3
GR7D2IN01ANVLM	---NA---	410	0			0	-
GR7D2IN01ARTUJ	---NA---	377	0			0	-
GR7D2IN01C0J63	s-formylglutathione hydrolase	439	10	1.72913e-33	93.0%	9	F:methyl indole-3-acetate esterase activity; F:carboxylesterase activity; P:response to cadmium ion; C:cytoplasmic membrane-bounded vesicle; F:S-formylglutathione hydrolase activity; F:retinyl-palmitate esterase activity; C:apoplast; F:methyl salicylate esterase activity; F:methyl jasmonate esterase activity	EC:3.1.1.1; EC:3.1.2.12; EC:3.1.1.21
GR7D2IN01A866K	cyclic nucleotide-gated ion channel 4-like	464	10	6.12902e-43	97.8%	8	P:plant-type hypersensitive response; F:cyclic nucleotide binding; P:divalent metal ion transport; P:cellular cation homeostasis; P:transmembrane transport; C:integral to membrane; F:cation channel activity; F:calmodulin binding	-
GR7D2IN01DULVV	---NA---	371	0			0	-
GR7D2IN01DJOIL	o-diphenol-o-methyl transferase	445	10	8.81773e-36	84.9%	4	F:catechol O-methyltransferase activity; F:protein dimerization activity; F:caffeate O-methyltransferase activity; P:methylation	EC:2.1.1.6; EC:2.1.1.68
GR7D2IN01AKA0E	1-aminocyclopropane-1-carboxylate synthase	504	10	1.27952e-66	90.0%	4	F:pyridoxal phosphate binding; F:1-aminocyclopropane-1-carboxylate synthase activity; F:transferase activity; P:1-aminocyclopropane-1-carboxylate biosynthetic process	EC:4.4.1.14
GR7D2IN01EMMF8	benzoquinone reductase	391	10	7.18789e-37	84.3%	7	F:2-hydroxy-1,4-benzoquinone reductase activity; P:oxidation-reduction process; P:response to auxin stimulus; P:negative regulation of transcription, DNA-dependent; C:vacuole; F:FMN binding; C:plasma membrane	EC:1.6.5.7
GR7D2IN01D5MTE	uncharacterized protein loc100266835	408	10	7.34888e-21	76.8%	0	-
GR7D2IN01EZ4O4	protein	431	10	3.28031e-34	77.3%	1	C:intracellular part	-
GR7D2IN01BIPDE	magnesium transporter mrs2-4-like	486	10	1.49748e-45	79.3%	6	P:pollen development; P:magnesium ion transport; C:plasma membrane; P:transmembrane transport; F:magnesium ion transmembrane transporter activity; C:mitochondrion	-
GR7D2IN01APCGX	receptor-like protein	478	10	7.5188e-15	72.8%	1	F:receptor activity
GR7D2IN01EIR74	conserved hypothetical protein [Ricinus communis]	262	1	7367.48	94.0%	0	-
GR7D2IN01C3LXM	---NA---	448	0			0	-
GR7D2IN01A0DII	pectin acetylesterase	399	10	2.46306e-21	89.2%	0	-
GR7D2IN01D4GMW	aconitate hydratase 1	426	10	3.84006e-26	96.8%	34	F:mRNA 5'-UTR binding; P:citrate metabolic process; C:apoplast; P:cellular response to nitric oxide; P:water transport; F:citrate dehydratase activity; C:vacuole; F:4 iron, 4 sulfur cluster binding; P:ethylene biosynthetic process; P:isocitrate metabolic process; P:response to salt stress; P:photosynthesis; F:isocitrate hydro-lyase (cis-aconitate-forming) activity; P:vacuole organization; F:oxido…	EC:4.2.1.3; EC:1.14.11.0; EC:1.14.17.4
GR7D2IN01E06LG	---NA---	299	0			0	-
GR7D2IN01A3VFT	---NA---	317	0			0	-
GR7D2IN01BZ1DG	at-rich interactive domain-containing protein 2	450	10	1.05952e-30	83.4%	0	-
GR7D2IN01C3A07	equilibrative nucleoside transporter	456	10	7.16892e-44	86.3%	5	F:nucleoside transmembrane transporter activity, against a concentration gradient; P:nucleoside transport; C:plasma membrane; C:vacuolar membrane; C:integral to membrane	-
GR7D2IN01EX6IC	secologanin synthase-like	368	10	1.39777e-32	82.6%	9	P:brassinosteroid metabolic process; F:electron carrier activity; F:monooxygenase activity; P:unidimensional cell growth; F:heme binding; F:oxidoreductase activity, acting on paired donors, with incorporation or reduction of molecular oxygen; C:endoplasmic reticulum; P:response to light stimulus; P:oxidation-reduction process	-
GR7D2IN01CQIDE	low quality protein: secologanin synthase-like	446	10	2.91276e-14	70.4%	0	-
GR7D2IN01BF3XF	bes1 bzr1 homolog protein 4-like	383	8	3.19022	788.75	0	-
GR7D2IN01DGEHZ	rrna intron-encoded homing endonuclease	381	10	3.18283e-08	100.0%	1	F:endonuclease activity	-
GR7D2IN01BONO0	chloride channel protein clc-f-like	455	10	0.0488284	73.4%	5	P:transport; C:intracellular membrane-bounded organelle; C:cytoplasmic part; C:membrane; F:ion channel activity	-
GR7D2IN01BE81B	cation-transporting atpase	329	4	0.255991	68.0%	2	F:binding; F:hydrolase activity, acting on acid anhydrides, catalyzing transmembrane movement of substances	EC:3.6.3.0
GR7D2IN01EW0NV	uncharacterized protein	497	8	9.08421e-23	631.25	8	P:meiosis I; P:gene expression; P:chromosome organization; P:DNA metabolic process; P:regulation of nucleobase-containing compound metabolic process; P:RNA metabolic process; P:cellular macromolecule biosynthetic process; P:regulation of macromolecule metabolic process	-
GR7D2IN01DCYNT	---NA---	358	0			0	-
GR7D2IN01ES97Q	protein	449	10	1.65722e-59	100.0%	10	C:cytoplasm; C:nucleolus; F:peptidase activity; C:proteasome regulatory particle, base subcomplex; C:plasma membrane; P:protein catabolic process; C:cell wall; F:ATP binding; F:microtubule-severing ATPase activity; P:proteolysis	EC:3.6.4.3
GR7D2IN01B7PVY	subtilisin-like protease	456	10	3.6948e-18	83.9%	15	C:cytosol; P:methionine biosynthetic process; P:regulation of meristem growth; C:plasmodesma; F:identical protein binding; C:plant-type cell wall; P:proteolysis; P:negative regulation of catalytic activity; F:serine-type endopeptidase activity; P:RNA splicing, via endonucleolytic cleavage and ligation; P:anther development; P:plant-type cell wall organization; C:extracellular region; P:plant-type…	EC:3.4.21.0
GR7D2IN01DB78P	dna replication licensing factor mcm6	408	10	1.95716e-46	94.5%	7	P:DNA unwinding involved in DNA replication; F:DNA-dependent ATPase activity; P:DNA replication initiation; F:DNA binding; F:protein binding; F:ATP binding; C:nucleus	-
GR7D2IN01DJELD	disease resistance protein at4g27190-like	517	10	0.0592119	61.8%	1	F:nucleotide binding	-
GR7D2IN01AYXW8	gtp cyclohydrolase i	521	10	5.4352e-10	86.5%	3	C:cytoplasm; F:GTP cyclohydrolase I activity; P:tetrahydrofolate biosynthetic process	EC:3.5.4.16
GR7D2IN01E1KX9	af120335_1 transposase	455	5	2161.8	70.8%	0	-
GR7D2IN01A3CT3	glycerophosphoryl diester	442	10	5.39137e-07	70.4%	6	P:root epidermal cell differentiation; P:cell morphogenesis; P:carbohydrate metabolic process; F:phosphoric diester hydrolase activity; P:cell development; C:plasma membrane	EC:3.1.4.0
GR7D2IN01A568I	plastid atp adp transport protein 2	511	10	1.45851e-68	95.9%	5	C:chloroplast envelope; P:transport; F:ATP:ADP antiporter activity; F:ATP binding; C:integral to membrane	-
GR7D2IN01C2OBN	mixed-lineage leukemia	351	10	4.43067e-39	76.7%	5	P:histone lysine methylation; F:histone-lysine N-methyltransferase activity; C:nucleus; F:zinc ion binding; C:mitochondrion	EC:2.1.1.43
GR7D2IN01BYA9D	---NA---	361	0			0	-
GR7D2IN01A243E	histone h2a	461	10	3.52593e-27	96.6%	4	C:nucleosome; F:DNA binding; P:nucleosome assembly; C:nucleus	-
GR7D2IN01EIQS0	uncharacterized protein loc100260307 isoform 2	475	10	2.69642e-26	82.5%	2	F:nucleic acid binding; C:mitochondrion	-
GR7D2IN01CH2E2	---NA---	422	0			0	-
GR7D2IN01CM1RK	---NA---	294	0			0	-
GR7D2IN01CXAO6	delta-9 desaturase	426	10	2.08154e-37	88.6%	11	P:negative regulation of defense response; P:fatty acid biosynthetic process; P:defense response to insect; F:oxidoreductase activity, acting on paired donors, with oxidation of a pair of donors resulting in the reduction of molecular oxygen to two molecules of water; F:drug transmembrane transporter activity; P:drug transmembrane transport; P:long-chain fatty acid metabolic process; P:response t…	EC:1.14.19.0
GR7D2IN01DLHZZ	---NA---	325	0			0	-
GR7D2IN01B8Y15	uncharacterized protein loc100253849 isoform 1	360	10	4.29392e-26	77.8%	2	F:RNA binding; P:RNA processing	-
GR7D2IN01CL8ZA	pentatricopeptide repeat-containing protein	513	10	1.41148e-21	67.7%	3	P:RNA splicing; P:embryo sac egg cell differentiation; C:mitochondrion	-
GR7D2IN01BG5YJ	eukaryotic translation initiation factor 4g-like	519	10	7.99105e-62	89.0%	6	P:translational initiation; F:DNA binding; P:response to abscisic acid stimulus; F:translation initiation factor activity; P:RNA metabolic process; P:response to virus	-
GR7D2IN01AV45A	---NA---	483	0			0	-
GR7D2IN01E0J4G	---NA---	530	0			0	-
GR7D2IN01BQGTB	phospholipase d-gamma	425	10	5.75564e-50	86.7%	15	P:response to oxidative stress; F:calcium ion binding; P:lipid catabolic process; P:membrane lipid metabolic process; P:phosphatidylcholine metabolic process; P:response to aluminum ion; F:phosphatidylinositol-4,5-bisphosphate binding; F:phospholipase D activity; F:protein binding; C:chloroplast; F:NAPE-specific phospholipase D activity; C:cytosolic ribosome; P:defense response to bacterium, inco…	EC:3.1.4.4
GR7D2IN01B8Y9Q	pentatricopeptide repeat-containing protein	481	10	1.55641e-71	97.2%	20	F:NAD binding; P:oxidation-reduction process; F:zinc ion binding; F:oxidoreductase activity, acting on NAD(P)H, NAD(P) as acceptor; C:mitochondrion; P:response to salt stress; F:cobalt ion binding; F:malate dehydrogenase (decarboxylating) activity; P:response to temperature stimulus; P:malate metabolic process; F:ATP binding; P:hyperosmotic response; P:water transport; P:Golgi organization; P:gly…	EC:1.6.1.0; EC:1.1.1.39; EC:4.1.1.3; EC:1.1.1.38
GR7D2IN01CNFSH	heat shock protein binding	298	10	2.78424e-12	97.0%	3	P:response to stress; F:heat shock protein binding; C:plastid	-
GR7D2IN01ASR9M	eukaryotic initiation factor 4b2	516	10	1.405e-16	69.7%	1	F:translation initiation factor activity	-
GR7D2IN01CA8U0	e3 ubiquitin-protein ligase ubr4	483	10	2.58336e-50	80.2%	13	C:cytosol; F:zinc ion binding; P:response to fungus; C:plasmodesma; P:auxin polar transport; P:photomorphogenesis; P:lateral root formation; P:response to auxin stimulus; F:ubiquitin-protein ligase activity; P:protein ubiquitination; P:indeterminate inflorescence morphogenesis; P:unidimensional cell growth; C:membrane	EC:6.3.2.19
GR7D2IN01E1DV0	dna polymerase	223	10	4.37262e-09	93.9%	7	F:DNA-directed DNA polymerase activity; P:DNA replication; F:DNA binding; F:3'-5' exonuclease activity; C:nucleoid; C:chloroplast; C:mitochondrion	EC:2.7.7.7
GR7D2IN01AY5NZ	---NA---	252	0			0	-
GR7D2IN01ARZLP	---NA---	421	0			0	-
GR7D2IN01EBBUY	microtubule-associated protein 70-2-like	484	10	2.04297e-31	83.2%	5	F:microtubule binding; C:cortical microtubule, transverse to long axis; C:plasma membrane; P:xylem and phloem pattern formation; P:plant-type cell wall biogenesis	-
GR7D2IN01DLU3U	---NA---	501	0			0	-
GR7D2IN01BUWXE	tubulin gamma-2 chain	444	10	2.23736e-46	97.4%	19	P:stomatal complex morphogenesis; F:structural molecule activity; P:phragmoplast assembly; P:microtubule-based process; P:cellular localization; C:microtubule organizing center; F:GTP binding; C:cell wall; P:GTP catabolic process; C:cytosol; C:microtubule; P:protein polymerization; C:nuclear envelope; P:embryo sac development; P:root hair cell tip growth; P:leaf development; F:GTPase activity; C:…	-
GR7D2IN01CQ1O1	sensitive to freezing 6 protein	330	10	7.5064e-34	82.8%	12	P:cold acclimation; P:cell adhesion; P:circadian regulation of gene expression; P:actin nucleation; P:regulation of long-day photoperiodism, flowering; P:protein desumoylation; P:response to osmotic stress; P:trichome morphogenesis; P:hydrogen peroxide biosynthetic process; P:root hair cell differentiation; C:nucleus; P:cell wall organization	-
GR7D2IN01AHEXG	ftsh protease 10	448	10	3.54761e-34	96.9%	9	F:ATPase activity; F:metalloendopeptidase activity; P:protein catabolic process; F:ATP binding; C:integral to membrane; P:proteolysis; F:zinc ion binding; C:chloroplast thylakoid membrane; C:mitochondrion	EC:3.6.1.3; EC:3.4.24.0
GR7D2IN01CPCPY	gag-pol polyprotein	465	9	1.28308e-23	82.0%	3	F:nucleic acid binding; F:zinc ion binding; P:DNA integration	-
GR7D2IN01EY2XN	xylulose kinase	446	10	9.1871e-45	89.2%	4	F:xylulokinase activity; C:cytosol; P:xylulose metabolic process; P:phosphorylation	EC:2.7.1.17
GR7D2IN01AVGF3	---NA---	422	0			0	-
GR7D2IN01D7BQ0	---NA---	489	0			0	-
GR7D2IN01DCEHP	zinc finger ccch domain-containing protein 53-like	377	10	9.94405e-24	91.6%	3	F:zinc ion binding; F:nucleotide binding; F:RNA binding	-
GR7D2IN01CAX5B	wd40 and beach domain-containing protein	416	10	8.54749e-23	85.0%	3	C:cytoplasmic membrane-bounded vesicle; P:signal transduction; C:mitochondrion	-
GR7D2IN01EZ39P	---NA---	473	0			0	-
GR7D2IN01C9JF8	splicing factor u2af large	438	10	1.65733e-41	93.4%	5	P:defense response to bacterium; F:RNA binding; C:nucleus; P:mRNA splicing, via spliceosome; F:nucleotide binding	-
GR7D2IN01DTLKG	uncharacterized protein	462	10	1.37373e-55	89.3%	1	C:plasma membrane	-
GR7D2IN01BJFR7	beta-hexosaminidase 2	518	10	1.21195e-62	86.5%	5	P:carbohydrate metabolic process; F:beta-N-acetylhexosaminidase activity; F:UDP-glucosyltransferase activity; C:plasma membrane; F:cation binding	EC:3.2.1.52
GR7D2IN01A54HD	---NA---	292	0			0	-
GR7D2IN01D1ZE5	wrky2 transcription partial	377	10	3.09364e-16	77.0%	3	F:sequence-specific DNA binding transcription factor activity; F:sequence-specific DNA binding; P:regulation of transcription, DNA-dependent	-
GR7D2IN01EKZP3	---NA---	291	0			0	-
GR7D2IN01A9VLN	helicase swr1	464	10	4.42302e-17	60.8%	15	P:flower development; P:response to wounding; P:production of small RNA involved in gene silencing by RNA; P:posttranscriptional gene silencing by RNA; P:macromolecule modification; C:cytosol; P:signaling; P:cell communication; P:organelle organization; P:organ boundary specification between lateral organs and the meristem; P:response to abiotic stimulus; P:regulation of cellular process; F:chrom…	-
GR7D2IN01C9QSI	phosphoenolpyruvate carboxylase	456	10	1.5756e-54	94.8%	3	P:tricarboxylic acid cycle; F:phosphoenolpyruvate carboxylase activity; P:carbon fixation	EC:4.1.1.31
GR7D2IN01C5P4Q	---NA---	383	0			0	-
GR7D2IN01E2AR3	abscisic insensitive 1b	283	10	4.90574e-23	88.9%	4	P:protein dephosphorylation; F:metal ion binding; F:protein serine/threonine phosphatase activity; C:protein serine/threonine phosphatase complex	-
GR7D2IN01DZPIN	zinc finger	520	10	0.00852563	89.1%	5	F:2-alkenal reductase [NAD(P)] activity; P:oxidation-reduction process; F:zinc ion binding; C:plasma membrane; F:transferase activity	EC:1.3.1.74
GR7D2IN01BD9FF	pleckstrin homology domain-containing protein	464	10	2.12535e-42	83.1%	7	P:nucleoside diphosphate phosphorylation; F:nucleoside diphosphate kinase activity; F:phospholipid binding; P:UTP biosynthetic process; F:ATP binding; P:GTP biosynthetic process; P:CTP biosynthetic process	EC:2.7.4.6
GR7D2IN01BH2HR	erd7 protein	342	10	5.48087e-21	76.0%	5	P:response to high light intensity; P:response to water deprivation; P:response to salt stress; P:response to cold; C:plasma membrane	-
GR7D2IN01BZJOX	polyribonucleotide nucleotidyltransferase, putative [Ricinus communis]	372	1	100.731	54.0%	7	P:mRNA catabolic process; F:RNA binding; F:nucleotidyltransferase activity; F:transferase activity; F:polyribonucleotide nucleotidyltransferase activity; P:RNA processing; F:3'-5'-exoribonuclease activity
GR7D2IN01BRYKL	---NA---	233	0			0	-
GR7D2IN01CJ6Z4	ubiquitin ligase protein	449	10	4.11609e-39	86.5%	13	P:red, far-red light phototransduction; P:protein phosphorylation; P:oxidation-reduction process; P:negative regulation of photomorphogenesis; P:regulation of photoperiodism, flowering; F:protein kinase activity; P:response to red light; F:ligase activity; F:ATP binding; F:2-alkenal reductase [NAD(P)] activity; P:response to far red light; P:short-day photoperiodism, flowering; C:nucleus	EC:1.3.1.74
GR7D2IN01BF4VI	---NA---	220	0			0	-
GR7D2IN01CI3FO	iaa-amino acid hydrolase 11	425	10	0.000356556	85.4%	7	F:IAA-Ala conjugate hydrolase activity; P:response to wounding; F:hippurate hydrolase activity; C:plasma membrane; P:metabolic process; P:regulation of systemic acquired resistance; C:endoplasmic reticulum	EC:3.5.1.32
GR7D2IN01CFSOW	transformation transcription domain-associated protein	456	10	4.71845e-05	81.8%	12	P:microtubule cytoskeleton organization; F:kinase activity; P:methylation-dependent chromatin silencing; P:cytokinesis by cell plate formation; F:phosphotransferase activity, alcohol group as acceptor; P:vegetative phase change; P:phosphorylation; C:cytosol; P:production of miRNAs involved in gene silencing by miRNA; C:plasmodesma; P:production of ta-siRNAs involved in RNA interference; P:virus i…	EC:2.7.1.0
GR7D2IN01D2IYM	arginine-trna-protein transferase 1 homolog	458	10	4.29697e-55	87.3%	14	P:arginyl-tRNA aminoacylation; P:regulation of seed germination; F:nucleic acid binding; P:regulation of lipid catabolic process; P:protein arginylation; F:arginyltransferase activity; P:methylglyoxal catabolic process to D-lactate; F:ATP binding; P:xylem development; P:response to abscisic acid stimulus; P:calcium ion transport; F:arginine-tRNA ligase activity; P:leaf senescence; C:cytoplasm	EC:2.3.2.8; EC:6.1.1.19
GR7D2IN01AVR7A	protein	358	10	0.000229695	62.4%	1	F:oxidoreductase activity, acting on CH-OH group of donors	-
GR7D2IN01BS1UK	programmed cell death 6-interacting	480	10	1.28274e-49	93.3%	2	C:plasmodesma; C:cytosol	-
GR7D2IN01ETVYH	run and tbc1 domain containing	381	10	5.41517e-29	79.3%	3	F:Rab GTPase activator activity; C:cytosol; P:positive regulation of Rab GTPase activity	-
GR7D2IN01CXOIJ	adp-ribosylation factor gtpase-activating protein agd7-like	504	10	1.36349e-48	97.2%	4	C:cytosol; F:ARF GTPase activator activity; P:regulation of ARF GTPase activity; F:zinc ion binding	-
GR7D2IN01A8JR4	uncharacterized protein loc100781324	435	10	3.79026e-55	92.4%	1	C:mitochondrion	-
GR7D2IN01E4AYO	aldose 1-	491	10	9.21142e-51	84.1%	3	F:carbohydrate binding; P:carbohydrate metabolic process; F:isomerase activity	-
GR7D2IN01ET6ZW	mitogen-activated protein kinase kinase kinase a	462	10	2.37606e-07	73.7%	3	F:kinase activity; P:phosphorylation; F:nucleotide binding	-
GR7D2IN01DHHEZ	dna repair protein rad23-4	362	10	7.0803e-18	81.8%	9	P:proteasomal ubiquitin-dependent protein catabolic process; C:cytosol; P:nucleotide-excision repair; F:damaged DNA binding; P:response to cold; F:ubiquitin binding; F:proteasome binding; P:mitosis; C:nucleus	-
GR7D2IN01EAHPX	snare associated golgi protein	415	10	2.26337e-14	70.2%	1	C:endoplasmic reticulum	-
GR7D2IN01BSI46	transcription factor glabra 3-like	249	10	2.72055e-12	74.6%	2	P:epidermal cell differentiation; P:cell fate specification	-
GR7D2IN01CEFGH	putative protein [Arabidopsis thaliana]	474	1	0.342416	85.0%	0	-
GR7D2IN01AN6W8	---NA---	346	0			0	-
GR7D2IN01CJC2A	f-box family protein	364	10	2.20561	62.0%	4	F:binding; P:cellular response to chemical stimulus; P:response to organic substance; P:organ development	-
GR7D2IN01E3GS0	protein transport protein sec31	505	10	1.03905e-21	93.2%	6	C:plasmodesma; P:N-terminal protein myristoylation; C:membrane; C:cytosol; P:glucose catabolic process; C:Cul4-RING ubiquitin ligase complex	-
GR7D2IN01EMDVJ	yt521-b-like protein	422	9	7.42948e-18	566666666666666	2	F:molecular_function; P:biological_process
GR7D2IN01ES9VB	af203882_1dynamin homolog	414	8	0.286982	601.25	5	F:GTP binding; F:GTPase activity; P:GTP catabolic process; F:nucleotide binding; F:phospholipid binding
GR7D2IN01BUH9M	peroxisomal biogenesis	509	10	4.23196e-37	95.5%	8	F:identical protein binding; P:systemic acquired resistance; C:integral to peroxisomal membrane; P:regulation of defense response; C:plasmodesma; P:peroxisome fission; C:chloroplast; C:mitochondrion	-
GR7D2IN01ATI1X	fyve finger-containing phosphoinositide	487	10	2.21832e-57	92.5%	8	P:phosphatidylinositol phosphorylation; P:pollen development; F:metal ion binding; F:ATP binding; P:cellular protein metabolic process; F:1-phosphatidylinositol-3-phosphate 5-kinase activity; P:vacuole organization; C:mitochondrion	EC:2.7.1.150
GR7D2IN01BISZR	lysine-specific demethylase ref6-like	471	10	1.06034e-21	62.6%	7	P:negative regulation of histone acetylation; P:response to brassinosteroid stimulus; P:vegetative to reproductive phase transition of meristem; P:histone H3-K9 demethylation; P:leaf development; P:unidimensional cell growth; C:nucleus	-
GR7D2IN01AQC90	iaa-amino acid hydrolase 11	453	10	6.12782e-25	80.0%	6	F:IAA-Ala conjugate hydrolase activity; P:response to wounding; C:plasma membrane; P:metabolic process; P:regulation of systemic acquired resistance; C:endoplasmic reticulum	-
GR7D2IN01CXCNA	---NA---	337	0			0	-
[truncated: 25,450 more rows]

## Sheet: Kegg Pathways
Pathway	Seqs in Pathway	Enzyme	Ezyme ID	Seqs of Enzyme	Pathway ID	Seqs
Starch and sucrose metabolism	498	decarboxylase	ec:4.1.1.35	11	map00500	isotig00095
Starch and sucrose metabolism	498	decarboxylase	ec:4.1.1.35	11	map00500	isotig00096
Starch and sucrose metabolism	498	decarboxylase	ec:4.1.1.35	11	map00500	isotig00097
[truncated: 8,396 more rows]

## Sheet:  Kegg Pathways Summary
Kegg Pathway	Unigenes
[truncated: 19 more rows]
